# Supplementary material for: Computational Study on Substrate Specificity of a Novel Cysteine Protease 1 Precursor from Zea mays
Source: PubMed Central journal article supplement (PMC4100162; doi:10.3390/ijms150610459), 2014-06-11
Supplement: ijms-15-10459-s001.pdf [file ijms-15-10459-s001.pdf]

# Supplementary Information

## 1. The Coordinates of the Model

TITLE SWISS-MODEL SERVER (<http://swissmodel.expasy.org>)  
TITLE 2 Untitled Project  
EXPDTA THEORETICAL MODEL (SWISS-MODEL SERVER)  
AUTHOR SWISS-MODEL SERVER (SEE REFERENCE IN JRNL Records)  
REVSTAT 1 06-MAY-14 1MOD 1 03:24  
JRNL AUTH K.ARNOLD, L.BORDOLI, J.KOPP, T.SCHWEDE  
JRNL TITL SWISS-MODEL WORKSPACE: A WEB-BASED ENVIRONMENT FOR PROTEIN  
JRNL TITL 2 STRUCTURE HOMOMOLOGY MODELLING  
JRNL REF BIOINFORMATICS V. 22 195 2006  
JRNL REFN ISSN 1367-4803  
JRNL PMID 16301204  
JRNL DOI 10.1093/bioinformatics/bti770  
REMARK 1  
REMARK 1 REFERENCE 1  
REMARK 1 AUTH P.BENKERT, M.BIASINI, T.SCHWEDE  
REMARK 1 TITL TOWARD THE ESTIMATION OF THE ABSOLUTE QUALITY OF INDIVIDUAL  
REMARK 1 TITL 2 PROTEIN STRUCTURE MODELS  
REMARK 1 REF BIOINFORMATICS V. 3 343 2011  
REMARK 1 REFN ISSN 1367-4803  
REMARK 1 PMID 21134891  
REMARK 1 DOI 10.1093/bioinformatics/btq662  
REMARK 1  
REMARK 1 REFERENCE 2  
REMARK 1 AUTH F.KIEFER, K.ARNOLD, M.KUENZLI, L.BORDOLI, T.SCHWEDE  
REMARK 1 TITL THE SWISS-MODEL REPOSITORY AND ASSOCIATED RESOURCES  
REMARK 1 REF NUCLEIC.ACIDS.RES V. 37 D387 2009  
REMARK 1 REFN ISSN 0305-1048  
REMARK 1 PMID 18931379  
REMARK 1 DOI 10.1093/nar/gkn750  
REMARK 1  
REMARK 1  
REMARK 1 REFERENCE 3  
REMARK 1 AUTH T.SCHWEDE, J.KOPP, N.GUOX, M.C.PEITSCH  
REMARK 1 TITL SWISS\_MODEL: AN AUTOMATED PROTEIN HOMOMOLOGY-MODELING  
REMARK 1 TITL 2 SERVER  
REMARK 1 REF NUCLEIC.ACIDS.RES. V. 31 3381 2003  
REMARK 1 REFN ISSN 0305-1048  
REMARK 1 PMID 12824332  
REMARK 1 DOI 10.1093/nar/gkg520  
REMARK 1

REMARK 1 REFERENCE 4

REMARK 1 AUTH M.C.PEITSCH, N.GUEX

REMARK 1 TITL SWISS-MODEL AND THE SWISS-PDBVIEWER: AN ENVIRONMENT

REMARK 1 TITL 2 FOR COMPARATIVE PROTEIN MODELLING

REMARK 1 REF ELECTROPHORESIS V. 18 2714 1997

REMARK 1 REFN ISSN

REMARK 1 DOI 10.1002/elps.1150181505

REMARK 1 PMID 9504803

REMARK 1

REMARK 1 REFERENCE 5

REMARK 1 AUTH M.C.PEITSCH

REMARK 1 TITL PROTEIN MODELING BY E-MAIL

REMARK 1 REF BIO/TECHNOLOGY V. 13 658 1995

REMARK 1 REFN ISSN 1087-0156

REMARK 1 DOI 10.1038/nbt0795-658

REMARK 1

REMARK 1 DISCLAIMER

REMARK 1 The SWISS-MODEL SERVER produces theoretical models for proteins.

REMARK 1 The results of any theoretical modelling procedure is

REMARK 1 NON-EXPERIMENTAL and MUST be considered with care. These models may

REMARK 1 contain significant errors. This is especially true for automated

REMARK 1 modeling since there is no human intervention during model

REMARK 1 building. Please read the header section and the logfile carefully

REMARK 1 to know what templates and alignments were used during the model

REMARK 1 building process. All information by the SWISS-MODEL SERVER is

REMARK 1 provided "AS-IS", without any warranty, expressed or implied.

REMARK 2

REMARK 2 COPYRIGHT NOTICE

REMARK 2 This SWISS-MODEL protein model is copyright. It is produced by the

REMARK 2 SWISS-MODEL Server Group at Swiss Institute of Bioinformatics. There

REMARK 2 are no restrictions on the use of individual models for your or your

REMARK 2 employer's research projects. If you publish or patent any results

REMARK 2 obtained from this model, please cite the papers mentioned under

REMARK 2 JRNL.

REMARK 2

REMARK 2 FAIR USE NOTICE

REMARK 2 Downloading the entire data-base or substantial portions of it,

REMARK 2 systematic or automatic submission of data, mirroring the

REMARK 2 repository, or further redistribution of substantial portions data

REMARK 2 obtained from SWISS-MODEL is prohibited and requires written

REMARK 2 permission from the SWISS-MODEL Server Group at Swiss Institute of

REMARK 2 Bioinformatics.

REMARK 3

REMARK 3 MODEL INFORMATION

REMARK 3 ENGIN PROMOD

REMARK 3 VERSN 3.70

REMARK 3 OSTAT MONOMER

REMARK 3 OSRSN USER

REMARK 3 GMQE NA

REMARK 3 QMN4 -1.26

REMARK 3

REMARK 3 TEMPLATE 1

REMARK 3 PDBID 1s4v

REMARK 3 CHAIN A

REMARK 3 MMCIF A

REMARK 3 PDBV 04-04-2014

REMARK 3 SMTLE 1s4v.1.A

REMARK 3 SMTLV 09-04-14

REMARK 3 MTHD X-RAY DIFFRACTION 2.00 A

REMARK 3 FOUND HHblits

REMARK 3 GMQE 0.57

REMARK 3 SIM 0.49

REMARK 3 SID 58.80

REMARK 3 OSTAT monomer

REMARK 3 LIGND DVA-LEU-LYS-0QE

|      |    |     |     |   |     |        |        |        |      |      |   |
|------|----|-----|-----|---|-----|--------|--------|--------|------|------|---|
| ATOM | 1  | N   | ASP | A | 124 | 22.257 | 29.647 | 22.354 | 1.00 | 0.44 | N |
| ATOM | 2  | CA  | ASP | A | 124 | 21.712 | 30.942 | 22.801 | 1.00 | 0.44 | C |
| ATOM | 3  | C   | ASP | A | 124 | 20.891 | 31.624 | 21.689 | 1.00 | 0.44 | C |
| ATOM | 4  | O   | ASP | A | 124 | 21.441 | 32.240 | 20.778 | 1.00 | 0.44 | O |
| ATOM | 5  | CB  | ASP | A | 124 | 22.842 | 31.865 | 23.284 | 1.00 | 0.44 | C |
| ATOM | 6  | CG  | ASP | A | 124 | 22.338 | 33.236 | 23.763 | 1.00 | 0.44 | C |
| ATOM | 7  | OD1 | ASP | A | 124 | 21.101 | 33.416 | 23.848 | 1.00 | 0.44 | O |
| ATOM | 8  | OD2 | ASP | A | 124 | 23.207 | 34.066 | 24.098 | 1.00 | 0.44 | O |
| ATOM | 9  | N   | ALA | A | 125 | 19.577 | 31.503 | 21.823 | 1.00 | 0.65 | N |
| ATOM | 10 | CA  | ALA | A | 125 | 18.642 | 32.171 | 20.905 | 1.00 | 0.65 | C |
| ATOM | 11 | C   | ALA | A | 125 | 17.996 | 33.346 | 21.643 | 1.00 | 0.65 | C |
| ATOM | 12 | O   | ALA | A | 125 | 17.670 | 33.239 | 22.828 | 1.00 | 0.65 | O |
| ATOM | 13 | CB  | ALA | A | 125 | 17.575 | 31.171 | 20.453 | 1.00 | 0.65 | C |
| ATOM | 14 | N   | ALA | A | 126 | 17.848 | 34.455 | 20.924 | 1.00 | 0.74 | N |
| ATOM | 15 | CA  | ALA | A | 126 | 17.194 | 35.663 | 21.462 | 1.00 | 0.74 | C |
| ATOM | 16 | C   | ALA | A | 126 | 15.799 | 35.302 | 22.000 | 1.00 | 0.74 | C |
| ATOM | 17 | O   | ALA | A | 126 | 15.167 | 34.346 | 21.547 | 1.00 | 0.74 | O |
| ATOM | 18 | CB  | ALA | A | 126 | 17.073 | 36.718 | 20.356 | 1.00 | 0.74 | C |
| ATOM | 19 | N   | GLN | A | 127 | 15.356 | 36.062 | 22.990 | 1.00 | 0.67 | N |

|      |    |     |     |   |     |        |        |        |      |      |   |
|------|----|-----|-----|---|-----|--------|--------|--------|------|------|---|
| ATOM | 20 | CA  | GLN | A | 127 | 14.014 | 35.903 | 23.590 | 1.00 | 0.67 | C |
| ATOM | 21 | C   | GLN | A | 127 | 12.905 | 35.954 | 22.524 | 1.00 | 0.67 | C |
| ATOM | 22 | O   | GLN | A | 127 | 11.916 | 35.231 | 22.618 | 1.00 | 0.67 | O |
| ATOM | 23 | CB  | GLN | A | 127 | 13.749 | 36.957 | 24.678 | 1.00 | 0.67 | C |
| ATOM | 24 | CG  | GLN | A | 127 | 13.637 | 38.417 | 24.205 | 1.00 | 0.67 | C |
| ATOM | 25 | CD  | GLN | A | 127 | 14.937 | 39.039 | 23.677 | 1.00 | 0.67 | C |
| ATOM | 26 | OE1 | GLN | A | 127 | 16.041 | 38.520 | 23.747 | 1.00 | 0.67 | O |
| ATOM | 27 | NE2 | GLN | A | 127 | 14.825 | 40.235 | 23.162 | 1.00 | 0.67 | N |
| ATOM | 28 | N   | SER | A | 128 | 13.106 | 36.799 | 21.512 | 1.00 | 0.83 | N |
| ATOM | 29 | CA  | SER | A | 128 | 12.147 | 36.959 | 20.407 | 1.00 | 0.83 | C |
| ATOM | 30 | C   | SER | A | 128 | 12.827 | 37.501 | 19.151 | 1.00 | 0.83 | C |
| ATOM | 31 | O   | SER | A | 128 | 13.841 | 38.198 | 19.215 | 1.00 | 0.83 | O |
| ATOM | 32 | CB  | SER | A | 128 | 11.019 | 37.917 | 20.803 | 1.00 | 0.83 | C |
| ATOM | 33 | OG  | SER | A | 128 | 11.525 | 39.232 | 21.051 | 1.00 | 0.83 | O |
| ATOM | 34 | N   | VAL | A | 129 | 12.260 | 37.097 | 18.024 | 1.00 | 0.86 | N |
| ATOM | 35 | CA  | VAL | A | 129 | 12.715 | 37.537 | 16.691 | 1.00 | 0.86 | C |
| ATOM | 36 | C   | VAL | A | 129 | 11.475 | 37.853 | 15.849 | 1.00 | 0.86 | C |
| ATOM | 37 | O   | VAL | A | 129 | 10.532 | 37.068 | 15.803 | 1.00 | 0.86 | O |
| ATOM | 38 | CB  | VAL | A | 129 | 13.580 | 36.450 | 16.019 | 1.00 | 0.86 | C |
| ATOM | 39 | CG1 | VAL | A | 129 | 14.044 | 36.870 | 14.622 | 1.00 | 0.86 | C |
| ATOM | 40 | CG2 | VAL | A | 129 | 14.831 | 36.121 | 16.843 | 1.00 | 0.86 | C |
| ATOM | 41 | N   | ASP | A | 130 | 11.512 | 39.013 | 15.208 | 1.00 | 0.86 | N |
| ATOM | 42 | CA  | ASP | A | 130 | 10.466 | 39.432 | 14.269 | 1.00 | 0.86 | C |
| ATOM | 43 | C   | ASP | A | 130 | 11.144 | 39.863 | 12.963 | 1.00 | 0.86 | C |
| ATOM | 44 | O   | ASP | A | 130 | 11.522 | 41.024 | 12.809 | 1.00 | 0.86 | O |
| ATOM | 45 | CB  | ASP | A | 130 | 9.650  | 40.572 | 14.895 | 1.00 | 0.86 | C |
| ATOM | 46 | CG  | ASP | A | 130 | 8.446  | 40.985 | 14.041 | 1.00 | 0.86 | C |
| ATOM | 47 | OD1 | ASP | A | 130 | 8.487  | 40.761 | 12.808 | 1.00 | 0.86 | O |
| ATOM | 48 | OD2 | ASP | A | 130 | 7.506  | 41.549 | 14.629 | 1.00 | 0.86 | O |
| ATOM | 49 | N   | TRP | A | 131 | 11.180 | 38.945 | 12.006 | 1.00 | 0.81 | N |
| ATOM | 50 | CA  | TRP | A | 131 | 11.783 | 39.208 | 10.684 | 1.00 | 0.81 | C |
| ATOM | 51 | C   | TRP | A | 131 | 11.112 | 40.331 | 9.886  | 1.00 | 0.81 | C |
| ATOM | 52 | O   | TRP | A | 131 | 11.769 | 40.999 | 9.089  | 1.00 | 0.81 | O |
| ATOM | 53 | CB  | TRP | A | 131 | 11.857 | 37.930 | 9.850  | 1.00 | 0.81 | C |
| ATOM | 54 | CG  | TRP | A | 131 | 12.856 | 36.957 | 10.472 | 1.00 | 0.81 | C |
| ATOM | 55 | CD1 | TRP | A | 131 | 12.581 | 35.780 | 11.029 | 1.00 | 0.81 | C |
| ATOM | 56 | CD2 | TRP | A | 131 | 14.220 | 37.170 | 10.599 | 1.00 | 0.81 | C |
| ATOM | 57 | NE1 | TRP | A | 131 | 13.703 | 35.242 | 11.505 | 1.00 | 0.81 | N |
| ATOM | 58 | CE2 | TRP | A | 131 | 14.720 | 36.064 | 11.263 | 1.00 | 0.81 | C |
| ATOM | 59 | CE3 | TRP | A | 131 | 15.062 | 38.208 | 10.220 | 1.00 | 0.81 | C |
| ATOM | 60 | CZ2 | TRP | A | 131 | 16.073 | 35.996 | 11.557 | 1.00 | 0.81 | C |
| ATOM | 61 | CZ3 | TRP | A | 131 | 16.419 | 38.130 | 10.502 | 1.00 | 0.81 | C |

|      |     |        |      |     |        |        |        |        |      |      |   |
|------|-----|--------|------|-----|--------|--------|--------|--------|------|------|---|
| ATOM | 62  | CH2TRP | A    | 131 | 16.926 | 37.023 | 11.173 | 1.00   | 0.81 | C    |   |
| ATOM | 63  | N      | ARG  | A   | 132    | 9.843  | 40.603 | 10.184 | 1.00 | 0.73 | N |
| ATOM | 64  | CA     | ARG  | A   | 132    | 9.118  | 41.740 | 9.575  | 1.00 | 0.73 | C |
| ATOM | 65  | C      | ARG  | A   | 132    | 9.724  | 43.070 | 10.038 | 1.00 | 0.73 | C |
| ATOM | 66  | O      | ARG  | A   | 132    | 10.152 | 43.874 | 9.218  | 1.00 | 0.73 | O |
| ATOM | 67  | CB     | ARG  | A   | 132    | 7.647  | 41.759 | 9.969  | 1.00 | 0.73 | C |
| ATOM | 68  | CG     | ARG  | A   | 132    | 6.907  | 40.483 | 9.579  | 1.00 | 0.73 | C |
| ATOM | 69  | CD     | ARG  | A   | 132    | 5.500  | 40.527 | 10.159 | 1.00 | 0.73 | C |
| ATOM | 70  | NE     | ARG  | A   | 132    | 5.571  | 40.621 | 11.624 | 1.00 | 0.73 | N |
| ATOM | 71  | CZ     | ARG  | A   | 132    | 4.535  | 40.749 | 12.445 | 1.00 | 0.73 | C |
| ATOM | 72  | NH1    | ARG  | A   | 132    | 3.287  | 40.754 | 11.997 | 1.00 | 0.73 | N |
| ATOM | 73  | NH2    | ARG  | A   | 132    | 4.748  | 40.884 | 13.739 | 1.00 | 0.73 | N |
| ATOM | 74  | N      | ALA  | A   | 133    | 9.920  | 43.166 | 11.353 | 1.00 | 0.78 | N |
| ATOM | 75  | CA     | ALA  | A   | 133    | 10.572 | 44.317 | 12.008 | 1.00 | 0.78 | C |
| ATOM | 76  | C      | ALA  | A   | 133    | 12.056 | 44.438 | 11.626 | 1.00 | 0.78 | C |
| ATOM | 77  | O      | ALA  | A   | 133    | 12.580 | 45.543 | 11.527 | 1.00 | 0.78 | O |
| ATOM | 78  | CB     | ALA  | A   | 133    | 10.439 | 44.187 | 13.527 | 1.00 | 0.78 | C |
| ATOM | 79  | N      | MET  | A   | 134    | 12.690 | 43.293 | 11.374 | 1.00 | 0.73 | N |
| ATOM | 80  | CA     | MET  | A   | 134    | 14.098 | 43.232 | 10.931 | 1.00 | 0.73 | C |
| ATOM | 81  | C      | MET  | A   | 134    | 14.255 | 43.599 | 9.439  | 1.00 | 0.73 | C |
| ATOM | 82  | O      | MET  | A   | 134    | 15.364 | 43.710 | 8.920  | 1.00 | 0.73 | O |
| ATOM | 83  | CB     | MET  | A   | 134    | 14.668 | 41.844 | 11.251 | 1.00 | 0.73 | C |
| ATOM | 84  | CG     | MET  | A   | 134    | 16.189 | 41.769 | 11.048 | 1.00 | 0.73 | C |
| ATOM | 85  | SD     | MET  | A   | 134    | 17.141 | 42.965 | 12.054 | 1.00 | 0.73 | S |
| ATOM | 86  | CE     | MET  | A   | 134    | 17.038 | 42.159 | 13.637 | 1.00 | 0.73 | C |
| ATOM | 87  | N      | GLYA | 135 | 13.106 | 43.744 | 8.767  | 1.00   | 0.75 | N    |   |
| ATOM | 88  | CA     | GLYA | 135 | 13.026 | 44.136 | 7.349  | 1.00   | 0.75 | C    |   |
| ATOM | 89  | C      | GLYA | 135 | 13.404 | 43.016 | 6.374  | 1.00   | 0.75 | C    |   |
| ATOM | 90  | O      | GLYA | 135 | 13.847 | 43.303 | 5.267  | 1.00   | 0.75 | O    |   |
| ATOM | 91  | N      | ALA  | A   | 136    | 13.078 | 41.775 | 6.732  | 1.00 | 0.76 | N |
| ATOM | 92  | CA     | ALA  | A   | 136    | 13.308 | 40.616 | 5.846  | 1.00 | 0.76 | C |
| ATOM | 93  | C      | ALA  | A   | 136    | 12.011 | 39.992 | 5.298  | 1.00 | 0.76 | C |
| ATOM | 94  | O      | ALA  | A   | 136    | 12.020 | 38.912 | 4.707  | 1.00 | 0.76 | O |
| ATOM | 95  | CB     | ALA  | A   | 136    | 14.143 | 39.574 | 6.600  | 1.00 | 0.76 | C |
| ATOM | 96  | N      | VALA | 137 | 10.894 | 40.702 | 5.453  | 1.00   | 0.75 | N    |   |
| ATOM | 97  | CA     | VALA | 137 | 9.586  | 40.208 | 4.983  | 1.00   | 0.75 | C    |   |
| ATOM | 98  | C      | VALA | 137 | 8.924  | 41.262 | 4.088  | 1.00   | 0.75 | C    |   |
| ATOM | 99  | O      | VALA | 137 | 8.808  | 42.430 | 4.452  | 1.00   | 0.75 | O    |   |
| ATOM | 100 | CB     | VALA | 137 | 8.677  | 39.836 | 6.173  | 1.00   | 0.75 | C    |   |
| ATOM | 101 | CG1    | VALA | 137 | 7.369  | 39.193 | 5.706  | 1.00   | 0.75 | C    |   |
| ATOM | 102 | CG2    | VALA | 137 | 9.358  | 38.856 | 7.132  | 1.00   | 0.75 | C    |   |
| ATOM | 103 | N      | THR  | A   | 138    | 8.430  | 40.778 | 2.957  | 1.00 | 0.74 | N |

|      |     |     |       |     |        |        |        |        |      |      |   |
|------|-----|-----|-------|-----|--------|--------|--------|--------|------|------|---|
| ATOM | 104 | CA  | THR   | A   | 138    | 7.672  | 41.611 | 2.001  | 1.00 | 0.74 | C |
| ATOM | 105 | C   | THR   | A   | 138    | 6.199  | 41.716 | 2.430  | 1.00 | 0.74 | C |
| ATOM | 106 | O   | THR   | A   | 138    | 5.777  | 41.057 | 3.381  | 1.00 | 0.74 | O |
| ATOM | 107 | CB  | THR   | A   | 138    | 7.784  | 41.039 | 0.580  | 1.00 | 0.74 | C |
| ATOM | 108 | OG1 | THR   | A   | 138    | 7.212  | 39.731 | 0.545  | 1.00 | 0.74 | O |
| ATOM | 109 | CG2 | THR   | A   | 138    | 9.232  | 41.009 | 0.079  | 1.00 | 0.74 | C |
| ATOM | 110 | N   | GLYA  | 139 | 5.419  | 42.447 | 1.623  | 1.00   | 0.77 | N    |   |
| ATOM | 111 | CA  | GLYA  | 139 | 3.967  | 42.601 | 1.842  | 1.00   | 0.77 | C    |   |
| ATOM | 112 | C   | GLYA  | 139 | 3.250  | 41.245 | 1.781  | 1.00   | 0.77 | C    |   |
| ATOM | 113 | O   | GLYA  | 139 | 3.718  | 40.304 | 1.140  | 1.00   | 0.77 | O    |   |
| ATOM | 114 | N   | VALA  | 140 | 2.143  | 41.160 | 2.508  | 1.00   | 0.79 | N    |   |
| ATOM | 115 | CA  | VALA  | 140 | 1.275  | 39.966 | 2.498  | 1.00   | 0.79 | C    |   |
| ATOM | 116 | C   | VALA  | 140 | 0.636  | 39.855 | 1.106  | 1.00   | 0.79 | C    |   |
| ATOM | 117 | O   | VALA  | 140 | 0.066  | 40.812 | 0.582  | 1.00   | 0.79 | O    |   |
| ATOM | 118 | CB  | VALA  | 140 | 0.207  | 40.057 | 3.604  | 1.00   | 0.79 | C    |   |
| ATOM | 119 | CG1 | VALA  | 140 | -0.750 | 38.858 | 3.593  | 1.00   | 0.79 | C    |   |
| ATOM | 120 | CG2 | VALA  | 140 | 0.866  | 40.124 | 4.984  | 1.00   | 0.79 | C    |   |
| ATOM | 121 | N   | LYS A | 141 | 0.648  | 38.632 | 0.603  | 1.00   | 0.75 | N    |   |
| ATOM | 122 | CA  | LYS A | 141 | 0.084  | 38.320 | -0.718 | 1.00   | 0.75 | C    |   |
| ATOM | 123 | C   | LYS A | 141 | -1.206 | 37.507 | -0.560 | 1.00   | 0.75 | C    |   |
| ATOM | 124 | O   | LYS A | 141 | -1.545 | 37.028 | 0.524  | 1.00   | 0.75 | O    |   |
| ATOM | 125 | CB  | LYS A | 141 | 1.092  | 37.502 | -1.524 | 1.00   | 0.75 | C    |   |
| ATOM | 126 | CG  | LYS A | 141 | 2.512  | 38.069 | -1.633 | 1.00   | 0.75 | C    |   |
| ATOM | 127 | CD  | LYS A | 141 | 2.560  | 39.495 | -2.192 | 1.00   | 0.75 | C    |   |
| ATOM | 128 | CE  | LYS A | 141 | 3.989  | 39.900 | -2.568 | 1.00   | 0.75 | C    |   |
| ATOM | 129 | NZ  | LYS A | 141 | 4.920  | 39.775 | -1.438 | 1.00   | 0.75 | N    |   |
| ATOM | 130 | N   | ASP A | 142 | -1.968 | 37.458 | -1.645 | 1.00   | 0.78 | N    |   |
| ATOM | 131 | CA  | ASP A | 142 | -3.180 | 36.634 | -1.709 | 1.00   | 0.78 | C    |   |
| ATOM | 132 | C   | ASP A | 142 | -3.062 | 35.701 | -2.917 | 1.00   | 0.78 | C    |   |
| ATOM | 133 | O   | ASP A | 142 | -3.082 | 36.155 | -4.061 | 1.00   | 0.78 | O    |   |
| ATOM | 134 | CB  | ASP A | 142 | -4.414 | 37.540 | -1.816 | 1.00   | 0.78 | C    |   |
| ATOM | 135 | CG  | ASP A | 142 | -5.734 | 36.778 | -1.648 | 1.00   | 0.78 | C    |   |
| ATOM | 136 | OD1 | ASP A | 142 | -5.771 | 35.583 | -2.022 | 1.00   | 0.78 | O    |   |
| ATOM | 137 | OD2 | ASP A | 142 | -6.690 | 37.412 | -1.160 | 1.00   | 0.78 | O    |   |
| ATOM | 138 | N   | GLN   | A   | 143    | -2.950 | 34.410 | -2.629 | 1.00 | 0.75 | N |
| ATOM | 139 | CA  | GLN   | A   | 143    | -2.846 | 33.376 | -3.676 | 1.00 | 0.75 | C |
| ATOM | 140 | C   | GLN   | A   | 143    | -4.072 | 33.304 | -4.604 | 1.00 | 0.75 | C |
| ATOM | 141 | O   | GLN   | A   | 143    | -3.957 | 32.773 | -5.700 | 1.00 | 0.75 | O |
| ATOM | 142 | CB  | GLN   | A   | 143    | -2.547 | 32.006 | -3.061 | 1.00 | 0.75 | C |
| ATOM | 143 | CG  | GLN   | A   | 143    | -3.674 | 31.477 | -2.171 | 1.00 | 0.75 | C |
| ATOM | 144 | CD  | GLN   | A   | 143    | -3.295 | 30.129 | -1.567 | 1.00 | 0.75 | C |
| ATOM | 145 | OE1 | GLN   | A   | 143    | -2.627 | 30.026 | -0.550 | 1.00 | 0.75 | O |

|      |     |     |      |   |     |        |        |        |      |      |   |
|------|-----|-----|------|---|-----|--------|--------|--------|------|------|---|
| ATOM | 146 | NE2 | GLN  | A | 143 | -3.675 | 29.058 | -2.223 | 1.00 | 0.75 | N |
| ATOM | 147 | N   | GLYA | A | 144 | -5.219 | 33.813 | -4.137 | 1.00 | 0.77 | N |
| ATOM | 148 | CA  | GLYA | A | 144 | -6.491 | 33.799 | -4.885 | 1.00 | 0.77 | C |
| ATOM | 149 | C   | GLYA | A | 144 | -6.995 | 32.365 | -5.094 | 1.00 | 0.77 | C |
| ATOM | 150 | O   | GLYA | A | 144 | -6.676 | 31.456 | -4.327 | 1.00 | 0.77 | O |
| ATOM | 151 | N   | ALA  | A | 145 | -7.727 | 32.182 | -6.190 | 1.00 | 0.77 | N |
| ATOM | 152 | CA  | ALA  | A | 145 | -8.310 | 30.877 | -6.562 | 1.00 | 0.77 | C |
| ATOM | 153 | C   | ALA  | A | 145 | -7.325 | 29.983 | -7.341 | 1.00 | 0.77 | C |
| ATOM | 154 | O   | ALA  | A | 145 | -7.539 | 29.583 | -8.486 | 1.00 | 0.77 | O |
| ATOM | 155 | CB  | ALA  | A | 145 | -9.611 | 31.125 | -7.333 | 1.00 | 0.77 | C |
| ATOM | 156 | N   | SERA | A | 146 | -6.221 | 29.675 | -6.673 | 1.00 | 0.77 | N |
| ATOM | 157 | CA  | SERA | A | 146 | -5.180 | 28.785 | -7.213 | 1.00 | 0.77 | C |
| ATOM | 158 | C   | SERA | A | 146 | -4.404 | 28.182 | -6.042 | 1.00 | 0.77 | C |
| ATOM | 159 | O   | SERA | A | 146 | -3.971 | 28.878 | -5.118 | 1.00 | 0.77 | O |
| ATOM | 160 | CB  | SERA | A | 146 | -4.226 | 29.558 | -8.121 | 1.00 | 0.77 | C |
| ATOM | 161 | OG  | SERA | A | 146 | -3.573 | 30.517 | -7.316 | 1.00 | 0.77 | O |
| ATOM | 162 | N   | GLYA | A | 147 | -4.401 | 26.848 | -6.027 | 1.00 | 0.86 | N |
| ATOM | 163 | CA  | GLYA | A | 147 | -3.741 | 26.072 | -4.958 | 1.00 | 0.86 | C |
| ATOM | 164 | C   | GLYA | A | 147 | -2.216 | 26.146 | -5.079 | 1.00 | 0.86 | C |
| ATOM | 165 | O   | GLYA | A | 147 | -1.539 | 25.138 | -5.268 | 1.00 | 0.86 | O |
| ATOM | 166 | N   | CYSA | A | 148 | -1.681 | 27.339 | -4.854 | 1.00 | 0.87 | N |
| ATOM | 167 | CA  | CYSA | A | 148 | -0.228 | 27.567 | -4.961 | 1.00 | 0.87 | C |
| ATOM | 168 | C   | CYSA | A | 148 | 0.380  | 28.030 | -3.630 | 1.00 | 0.87 | C |
| ATOM | 169 | O   | CYSA | A | 148 | 1.467  | 28.605 | -3.605 | 1.00 | 0.87 | O |
| ATOM | 170 | CB  | CYSA | A | 148 | 0.020  | 28.610 | -6.043 | 1.00 | 0.87 | C |
| ATOM | 171 | SG  | CYSA | A | 148 | -0.838 | 30.123 | -5.517 | 1.00 | 0.87 | S |
| ATOM | 172 | N   | CYSA | A | 149 | -0.252 | 27.642 | -2.524 | 1.00 | 0.85 | N |
| ATOM | 173 | CA  | CYSA | A | 149 | 0.259  | 27.952 | -1.172 | 1.00 | 0.85 | C |
| ATOM | 174 | C   | CYSA | A | 149 | 1.715  | 27.492 | -0.979 | 1.00 | 0.85 | C |
| ATOM | 175 | O   | CYSA | A | 149 | 2.534  | 28.235 | -0.444 | 1.00 | 0.85 | O |
| ATOM | 176 | CB  | CYSA | A | 149 | -0.620 | 27.298 | -0.109 | 1.00 | 0.85 | C |
| ATOM | 177 | SG  | CYSA | A | 149 | -0.614 | 25.466 | -0.135 | 1.00 | 0.85 | S |
| ATOM | 178 | N   | TRPA | A | 150 | 2.055  | 26.365 | -1.610 | 1.00 | 0.83 | N |
| ATOM | 179 | CA  | TRPA | A | 150 | 3.429  | 25.822 | -1.610 | 1.00 | 0.83 | C |
| ATOM | 180 | C   | TRPA | A | 150 | 4.459  | 26.798 | -2.202 | 1.00 | 0.83 | C |
| ATOM | 181 | O   | TRPA | A | 150 | 5.540  | 26.976 | -1.642 | 1.00 | 0.83 | O |
| ATOM | 182 | CB  | TRPA | A | 150 | 3.480  | 24.490 | -2.365 | 1.00 | 0.83 | C |
| ATOM | 183 | CG  | TRPA | A | 150 | 3.076  | 24.627 | -3.837 | 1.00 | 0.83 | C |
| ATOM | 184 | CD1 | TRPA | A | 150 | 1.833  | 24.577 | -4.308 | 1.00 | 0.83 | C |
| ATOM | 185 | CD2 | TRPA | A | 150 | 3.924  | 24.839 | -4.915 | 1.00 | 0.83 | C |
| ATOM | 186 | NE1 | TRPA | A | 150 | 1.852  | 24.740 | -5.631 | 1.00 | 0.83 | N |
| ATOM | 187 | CE2 | TRPA | A | 150 | 3.110  | 24.904 | -6.034 | 1.00 | 0.83 | C |

|      |     |     |     |   |     |        |        |        |      |      |   |
|------|-----|-----|-----|---|-----|--------|--------|--------|------|------|---|
| ATOM | 188 | CE3 | TRP | A | 150 | 5.304  | 24.970 | -5.043 | 1.00 | 0.83 | C |
| ATOM | 189 | CZ2 | TRP | A | 150 | 3.673  | 25.095 | -7.287 | 1.00 | 0.83 | C |
| ATOM | 190 | CZ3 | TRP | A | 150 | 5.867  | 25.151 | -6.302 | 1.00 | 0.83 | C |
| ATOM | 191 | CH2 | TRP | A | 150 | 5.051  | 25.211 | -7.425 | 1.00 | 0.83 | C |
| ATOM | 192 | N   | ALA | A | 151 | 4.053  | 27.500 | -3.261 | 1.00 | 0.87 | N |
| ATOM | 193 | CA  | ALA | A | 151 | 4.895  | 28.498 | -3.947 | 1.00 | 0.87 | C |
| ATOM | 194 | C   | ALA | A | 151 | 5.117  | 29.749 | -3.082 | 1.00 | 0.87 | C |
| ATOM | 195 | O   | ALA | A | 151 | 6.250  | 30.193 | -2.906 | 1.00 | 0.87 | O |
| ATOM | 196 | CB  | ALA | A | 151 | 4.260  | 28.884 | -5.286 | 1.00 | 0.87 | C |
| ATOM | 197 | N   | PHE | A | 152 | 4.041  | 30.202 | -2.436 | 1.00 | 0.83 | N |
| ATOM | 198 | CA  | PHE | A | 152 | 4.081  | 31.358 | -1.514 | 1.00 | 0.83 | C |
| ATOM | 199 | C   | PHE | A | 152 | 4.886  | 31.080 | -0.238 | 1.00 | 0.83 | C |
| ATOM | 200 | O   | PHE | A | 152 | 5.695  | 31.883 | 0.220  | 1.00 | 0.83 | O |
| ATOM | 201 | CB  | PHE | A | 152 | 2.668  | 31.804 | -1.141 | 1.00 | 0.83 | C |
| ATOM | 202 | CG  | PHE | A | 152 | 2.014  | 32.580 | -2.284 | 1.00 | 0.83 | C |
| ATOM | 203 | CD1 | PHE | A | 152 | 1.379  | 31.905 | -3.313 | 1.00 | 0.83 | C |
| ATOM | 204 | CD2 | PHE | A | 152 | 2.058  | 33.969 | -2.298 | 1.00 | 0.83 | C |
| ATOM | 205 | CE1 | PHE | A | 152 | 0.808  | 32.625 | -4.351 | 1.00 | 0.83 | C |
| ATOM | 206 | CE2 | PHE | A | 152 | 1.470  | 34.672 | -3.341 | 1.00 | 0.83 | C |
| ATOM | 207 | CZ  | PHE | A | 152 | 0.840  | 34.001 | -4.366 | 1.00 | 0.83 | C |
| ATOM | 208 | N   | SER | A | 153 | 4.749  | 29.865 | 0.272  | 1.00 | 0.88 | N |
| ATOM | 209 | CA  | SER | A | 153 | 5.545  | 29.433 | 1.433  | 1.00 | 0.88 | C |
| ATOM | 210 | C   | SER | A | 153 | 7.047  | 29.450 | 1.115  | 1.00 | 0.88 | C |
| ATOM | 211 | O   | SER | A | 153 | 7.834  | 30.035 | 1.857  | 1.00 | 0.88 | O |
| ATOM | 212 | CB  | SER | A | 153 | 5.115  | 28.031 | 1.835  | 1.00 | 0.88 | C |
| ATOM | 213 | OG  | SER | A | 153 | 5.991  | 27.526 | 2.841  | 1.00 | 0.88 | O |
| ATOM | 214 | N   | ALA | A | 154 | 7.389  | 28.903 | -0.051 | 1.00 | 0.88 | N |
| ATOM | 215 | CA  | ALA | A | 154 | 8.783  | 28.827 | -0.527 | 1.00 | 0.88 | C |
| ATOM | 216 | C   | ALA | A | 154 | 9.408  | 30.214 | -0.739 | 1.00 | 0.88 | C |
| ATOM | 217 | O   | ALA | A | 154 | 10.479 | 30.503 | -0.202 | 1.00 | 0.88 | O |
| ATOM | 218 | CB  | ALA | A | 154 | 8.832  | 28.034 | -1.834 | 1.00 | 0.88 | C |
| ATOM | 219 | N   | VAL | A | 155 | 8.635  | 31.109 | -1.355 | 1.00 | 0.84 | N |
| ATOM | 220 | CA  | VAL | A | 155 | 9.096  | 32.477 | -1.669 | 1.00 | 0.84 | C |
| ATOM | 221 | C   | VAL | A | 155 | 9.401  | 33.285 | -0.401 | 1.00 | 0.84 | C |
| ATOM | 222 | O   | VAL | A | 155 | 10.372 | 34.033 | -0.368 | 1.00 | 0.84 | O |
| ATOM | 223 | CB  | VAL | A | 155 | 8.096  | 33.214 | -2.580 | 1.00 | 0.84 | C |
| ATOM | 224 | CG1 | VAL | A | 155 | 6.766  | 33.463 | -1.889 | 1.00 | 0.84 | C |
| ATOM | 225 | CG2 | VAL | A | 155 | 8.612  | 34.573 | -3.049 | 1.00 | 0.84 | C |
| ATOM | 226 | N   | ALA | A | 156 | 8.600  | 33.085 | 0.637  | 1.00 | 0.85 | N |
| ATOM | 227 | CA  | ALA | A | 156 | 8.769  | 33.858 | 1.871  | 1.00 | 0.85 | C |
| ATOM | 228 | C   | ALA | A | 156 | 10.110 | 33.555 | 2.547  | 1.00 | 0.85 | C |
| ATOM | 229 | O   | ALA | A | 156 | 10.848 | 34.475 | 2.894  | 1.00 | 0.85 | O |



|      |     |     |      |     |        |        |        |        |      |      |   |
|------|-----|-----|------|-----|--------|--------|--------|--------|------|------|---|
| ATOM | 230 | CB  | ALA  | A   | 156    | 7.613  | 33.489 | 2.762  | 1.00 | 0.85 | C |
| ATOM | 231 | N   | ALA  | A   | 157    | 10.495 | 32.280 | 2.485  | 1.00 | 0.87 | N |
| ATOM | 232 | CA  | ALA  | A   | 157    | 11.790 | 31.807 | 3.002  | 1.00 | 0.87 | C |
| ATOM | 233 | C   | ALA  | A   | 157    | 12.978 | 32.319 | 2.167  | 1.00 | 0.87 | C |
| ATOM | 234 | O   | ALA  | A   | 157    | 13.973 | 32.784 | 2.722  | 1.00 | 0.87 | O |
| ATOM | 235 | CB  | ALA  | A   | 157    | 11.778 | 30.281 | 3.033  | 1.00 | 0.87 | C |
| ATOM | 236 | N   | VALA | 158 | 12.794 | 32.362 | 0.846  | 1.00   | 0.83 | N    |   |
| ATOM | 237 | CA  | VALA | 158 | 13.850 | 32.821 | -0.084 | 1.00   | 0.83 | C    |   |
| ATOM | 238 | C   | VALA | 158 | 14.027 | 34.346 | -0.003 | 1.00   | 0.83 | C    |   |
| ATOM | 239 | O   | VALA | 158 | 15.149 | 34.837 | 0.107  | 1.00   | 0.83 | O    |   |
| ATOM | 240 | CB  | VALA | 158 | 13.584 | 32.360 | -1.530 | 1.00   | 0.83 | C    |   |
| ATOM | 241 | CG1 | VALA | 158 | 14.708 | 32.796 | -2.476 | 1.00   | 0.83 | C    |   |
| ATOM | 242 | CG2 | VALA | 158 | 13.497 | 30.834 | -1.617 | 1.00   | 0.83 | C    |   |
| ATOM | 243 | N   | GLU  | A   | 159    | 12.908 | 35.067 | 0.028  | 1.00 | 0.76 | N |
| ATOM | 244 | CA  | GLU  | A   | 159    | 12.926 | 36.537 | 0.181  | 1.00 | 0.76 | C |
| ATOM | 245 | C   | GLU  | A   | 159    | 13.591 | 36.943 | 1.505  | 1.00 | 0.76 | C |
| ATOM | 246 | O   | GLU  | A   | 159    | 14.406 | 37.865 | 1.529  | 1.00 | 0.76 | O |
| ATOM | 247 | CB  | GLU  | A   | 159    | 11.512 | 37.115 | 0.168  | 1.00 | 0.76 | C |
| ATOM | 248 | CG  | GLU  | A   | 159    | 10.804 | 36.924 | -1.173 | 1.00 | 0.76 | C |
| ATOM | 249 | CD  | GLU  | A   | 159    | 9.375  | 37.470 | -1.153 | 1.00 | 0.76 | C |
| ATOM | 250 | OE1 | GLU  | A   | 159    | 8.752  | 37.465 | -0.069 | 1.00 | 0.76 | O |
| ATOM | 251 | OE2 | GLU  | A   | 159    | 8.915  | 37.843 | -2.256 | 1.00 | 0.76 | O |
| ATOM | 252 | N   | GLYA | 160 | 13.354 | 36.095 | 2.518  | 1.00   | 0.89 | N    |   |
| ATOM | 253 | CA  | GLYA | 160 | 13.894 | 36.257 | 3.880  | 1.00   | 0.89 | C    |   |
| ATOM | 254 | C   | GLYA | 160 | 15.421 | 36.136 | 3.910  | 1.00   | 0.89 | C    |   |
| ATOM | 255 | O   | GLYA | 160 | 16.125 | 37.125 | 4.124  | 1.00   | 0.89 | O    |   |
| ATOM | 256 | N   | LEUA | 161 | 15.902 | 34.943 | 3.563  | 1.00   | 0.80 | N    |   |
| ATOM | 257 | CA  | LEUA | 161 | 17.350 | 34.648 | 3.562  | 1.00   | 0.80 | C    |   |
| ATOM | 258 | C   | LEUA | 161 | 18.137 | 35.603 | 2.650  | 1.00   | 0.80 | C    |   |
| ATOM | 259 | O   | LEUA | 161 | 19.244 | 36.004 | 3.003  | 1.00   | 0.80 | O    |   |
| ATOM | 260 | CB  | LEUA | 161 | 17.590 | 33.177 | 3.189  | 1.00   | 0.80 | C    |   |
| ATOM | 261 | CG  | LEUA | 161 | 19.059 | 32.747 | 3.326  | 1.00   | 0.80 | C    |   |
| ATOM | 262 | CD1 | LEUA | 161 | 19.134 | 31.244 | 3.557  | 1.00   | 0.80 | C    |   |
| ATOM | 263 | CD2 | LEUA | 161 | 19.864 | 33.029 | 2.055  | 1.00   | 0.80 | C    |   |
| ATOM | 264 | N   | ASN  | A   | 162    | 17.510 | 36.050 | 1.560  | 1.00 | 0.76 | N |
| ATOM | 265 | CA  | ASN  | A   | 162    | 18.147 | 36.988 | 0.618  | 1.00 | 0.76 | C |
| ATOM | 266 | C   | ASN  | A   | 162    | 18.435 | 38.342 | 1.282  | 1.00 | 0.76 | C |
| ATOM | 267 | O   | ASN  | A   | 162    | 19.556 | 38.836 | 1.236  | 1.00 | 0.76 | O |
| ATOM | 268 | CB  | ASN  | A   | 162    | 17.284 | 37.185 | -0.630 | 1.00 | 0.76 | C |
| ATOM | 269 | CG  | ASN  | A   | 162    | 17.978 | 38.122 | -1.620 | 1.00 | 0.76 | C |
| ATOM | 270 | OD1 | ASN  | A   | 162    | 19.063 | 37.861 | -2.119 | 1.00 | 0.76 | O |
| ATOM | 271 | ND2 | ASN  | A   | 162    | 17.393 | 39.281 | -1.825 | 1.00 | 0.76 | N |

|      |     |     |      |   |     |        |        |        |      |      |   |
|------|-----|-----|------|---|-----|--------|--------|--------|------|------|---|
| ATOM | 272 | N   | LYS  | A | 163 | 17.445 | 38.860 | 2.000  | 1.00 | 0.73 | N |
| ATOM | 273 | CA  | LYS  | A | 163 | 17.589 | 40.135 | 2.723  | 1.00 | 0.73 | C |
| ATOM | 274 | C   | LYS  | A | 163 | 18.601 | 40.013 | 3.869  | 1.00 | 0.73 | C |
| ATOM | 275 | O   | LYS  | A | 163 | 19.399 | 40.913 | 4.098  | 1.00 | 0.73 | O |
| ATOM | 276 | CB  | LYS  | A | 163 | 16.226 | 40.567 | 3.271  | 1.00 | 0.73 | C |
| ATOM | 277 | CG  | LYS  | A | 163 | 16.278 | 41.889 | 4.047  | 1.00 | 0.73 | C |
| ATOM | 278 | CD  | LYS  | A | 163 | 16.704 | 43.006 | 3.111  | 1.00 | 0.73 | C |
| ATOM | 279 | CE  | LYS  | A | 163 | 16.732 | 44.425 | 3.656  | 1.00 | 0.73 | C |
| ATOM | 280 | NZ  | LYS  | A | 163 | 17.872 | 44.518 | 4.563  | 1.00 | 0.73 | N |
| ATOM | 281 | N   | ILE  | A | 164 | 18.577 | 38.873 | 4.549  | 1.00 | 0.74 | N |
| ATOM | 282 | CA  | ILE  | A | 164 | 19.515 | 38.590 | 5.655  | 1.00 | 0.74 | C |
| ATOM | 283 | C   | ILE  | A | 164 | 20.975 | 38.603 | 5.163  | 1.00 | 0.74 | C |
| ATOM | 284 | O   | ILE  | A | 164 | 21.868 | 39.053 | 5.879  | 1.00 | 0.74 | O |
| ATOM | 285 | CB  | ILE  | A | 164 | 19.147 | 37.256 | 6.337  | 1.00 | 0.74 | C |
| ATOM | 286 | CG1 | ILE  | A | 164 | 17.756 | 37.373 | 6.983  | 1.00 | 0.74 | C |
| ATOM | 287 | CG2 | ILE  | A | 164 | 20.208 | 36.820 | 7.366  | 1.00 | 0.74 | C |
| ATOM | 288 | CD1 | ILE  | A | 164 | 17.217 | 36.064 | 7.571  | 1.00 | 0.74 | C |
| ATOM | 289 | N   | ARG  | A | 165 | 21.185 | 38.102 | 3.951  | 1.00 | 0.72 | N |
| ATOM | 290 | CA  | ARG  | A | 165 | 22.544 | 37.953 | 3.401  | 1.00 | 0.72 | C |
| ATOM | 291 | C   | ARG  | A | 165 | 23.038 | 39.191 | 2.640  | 1.00 | 0.72 | C |
| ATOM | 292 | O   | ARG  | A | 165 | 24.202 | 39.567 | 2.757  | 1.00 | 0.72 | O |
| ATOM | 293 | CB  | ARG  | A | 165 | 22.638 | 36.697 | 2.527  | 1.00 | 0.72 | C |
| ATOM | 294 | CG  | ARG  | A | 165 | 21.718 | 36.760 | 1.309  | 1.00 | 0.72 | C |
| ATOM | 295 | CD  | ARG  | A | 165 | 21.918 | 35.566 | 0.403  | 1.00 | 0.72 | C |
| ATOM | 296 | NE  | ARG  | A | 165 | 21.026 | 35.664 | -0.762 | 1.00 | 0.72 | N |
| ATOM | 297 | CZ  | ARG  | A | 165 | 20.964 | 34.745 | -1.716 | 1.00 | 0.72 | C |
| ATOM | 298 | NH1 | ARG  | A | 165 | 21.740 | 33.667 | -1.658 | 1.00 | 0.72 | N |
| ATOM | 299 | NH2 | ARG  | A | 165 | 20.140 | 34.910 | -2.741 | 1.00 | 0.72 | N |
| ATOM | 300 | N   | THR  | A | 166 | 22.130 | 39.837 | 1.915  | 1.00 | 0.79 | N |
| ATOM | 301 | CA  | THR  | A | 166 | 22.501 | 40.940 | 1.004  | 1.00 | 0.79 | C |
| ATOM | 302 | C   | THR  | A | 166 | 22.089 | 42.309 | 1.556  | 1.00 | 0.79 | C |
| ATOM | 303 | O   | THR  | A | 166 | 22.485 | 43.346 | 1.024  | 1.00 | 0.79 | O |
| ATOM | 304 | CB  | THR  | A | 166 | 21.899 | 40.753 | -0.399 | 1.00 | 0.79 | C |
| ATOM | 305 | OG1 | THR  | A | 166 | 20.482 | 40.950 | -0.362 | 1.00 | 0.79 | O |
| ATOM | 306 | CG2 | THR  | A | 166 | 22.261 | 39.395 | -1.017 | 1.00 | 0.79 | C |
| ATOM | 307 | N   | GLYA | A | 167 | 21.199 | 42.282 | 2.554  | 1.00 | 0.77 | N |
| ATOM | 308 | CA  | GLYA | A | 167 | 20.635 | 43.504 | 3.152  | 1.00 | 0.77 | C |
| ATOM | 309 | C   | GLYA | A | 167 | 19.758 | 44.276 | 2.154  | 1.00 | 0.77 | C |
| ATOM | 310 | O   | GLYA | A | 167 | 19.547 | 45.474 | 2.329  | 1.00 | 0.77 | O |
| ATOM | 311 | N   | ARG  | A | 168 | 19.207 | 43.558 | 1.172  | 1.00 | 0.64 | N |
| ATOM | 312 | CA  | ARG  | A | 168 | 18.267 | 44.109 | 0.177  | 1.00 | 0.64 | C |
| ATOM | 313 | C   | ARG  | A | 168 | 17.013 | 43.230 | 0.053  | 1.00 | 0.64 | C |

|      |     |     |      |     |        |        |        |        |      |      |   |
|------|-----|-----|------|-----|--------|--------|--------|--------|------|------|---|
| ATOM | 314 | O   | ARG  | A   | 168    | 17.098 | 42.027 | -0.199 | 1.00 | 0.64 | O |
| ATOM | 315 | CB  | ARG  | A   | 168    | 18.961 | 44.226 | -1.181 | 1.00 | 0.64 | C |
| ATOM | 316 | CG  | ARG  | A   | 168    | 18.084 | 44.952 | -2.206 | 1.00 | 0.64 | C |
| ATOM | 317 | CD  | ARG  | A   | 168    | 17.862 | 46.417 | -1.816 | 1.00 | 0.64 | C |
| ATOM | 318 | NE  | ARG  | A   | 168    | 16.984 | 47.062 | -2.808 | 1.00 | 0.64 | N |
| ATOM | 319 | CZ  | ARG  | A   | 168    | 15.650 | 47.022 | -2.829 | 1.00 | 0.64 | C |
| ATOM | 320 | NH1 | ARG  | A   | 168    | 14.976 | 46.383 | -1.891 | 1.00 | 0.64 | N |
| ATOM | 321 | NH2 | ARG  | A   | 168    | 14.971 | 47.634 | -3.788 | 1.00 | 0.64 | N |
| ATOM | 322 | N   | LEUA | 169 | 15.868 | 43.838 | 0.366  | 1.00   | 0.65 | N    |   |
| ATOM | 323 | CA  | LEUA | 169 | 14.582 | 43.119 | 0.374  | 1.00   | 0.65 | C    |   |
| ATOM | 324 | C   | LEUA | 169 | 13.979 | 43.112 | -1.026 | 1.00   | 0.65 | C    |   |
| ATOM | 325 | O   | LEUA | 169 | 13.479 | 44.117 | -1.518 | 1.00   | 0.65 | O    |   |
| ATOM | 326 | CB  | LEUA | 169 | 13.601 | 43.721 | 1.392  | 1.00   | 0.65 | C    |   |
| ATOM | 327 | CG  | LEUA | 169 | 12.299 | 42.915 | 1.508  | 1.00   | 0.65 | C    |   |
| ATOM | 328 | CD1 | LEUA | 169 | 12.546 | 41.484 | 2.001  | 1.00   | 0.65 | C    |   |
| ATOM | 329 | CD2 | LEUA | 169 | 11.320 | 43.638 | 2.432  | 1.00   | 0.65 | C    |   |
| ATOM | 330 | N   | VALA | 170 | 13.998 | 41.938 | -1.633 | 1.00   | 0.67 | N    |   |
| ATOM | 331 | CA  | VALA | 170 | 13.499 | 41.782 | -3.010 | 1.00   | 0.67 | C    |   |
| ATOM | 332 | C   | VALA | 170 | 12.285 | 40.847 | -2.986 | 1.00   | 0.67 | C    |   |
| ATOM | 333 | O   | VALA | 170 | 12.345 | 39.742 | -2.444 | 1.00   | 0.67 | O    |   |
| ATOM | 334 | CB  | VALA | 170 | 14.608 | 41.229 | -3.928 | 1.00   | 0.67 | C    |   |
| ATOM | 335 | CG1 | VALA | 170 | 14.140 | 41.133 | -5.385 | 1.00   | 0.67 | C    |   |
| ATOM | 336 | CG2 | VALA | 170 | 15.885 | 42.077 | -3.876 | 1.00   | 0.67 | C    |   |
| ATOM | 337 | N   | SERA | 171 | 11.202 | 41.315 | -3.596 | 1.00   | 0.73 | N    |   |
| ATOM | 338 | CA  | SERA | 171 | 10.010 | 40.477 | -3.817 | 1.00   | 0.73 | C    |   |
| ATOM | 339 | C   | SERA | 171 | 10.270 | 39.534 | -4.998 | 1.00   | 0.73 | C    |   |
| ATOM | 340 | O   | SERA | 171 | 10.656 | 39.963 | -6.085 | 1.00   | 0.73 | O    |   |
| ATOM | 341 | CB  | SERA | 171 | 8.789  | 41.357 | -4.083 | 1.00   | 0.73 | C    |   |
| ATOM | 342 | OG  | SERA | 171 | 7.624  | 40.541 | -4.217 | 1.00   | 0.73 | O    |   |
| ATOM | 343 | N   | LEUA | 172 | 10.001 | 38.258 | -4.771 | 1.00   | 0.71 | N    |   |
| ATOM | 344 | CA  | LEUA | 172 | 10.288 | 37.194 | -5.746 | 1.00   | 0.71 | C    |   |
| ATOM | 345 | C   | LEUA | 172 | 9.016  | 36.580 | -6.342 | 1.00   | 0.71 | C    |   |
| ATOM | 346 | O   | LEUA | 172 | 7.916  | 36.750 | -5.819 | 1.00   | 0.71 | O    |   |
| ATOM | 347 | CB  | LEUA | 172 | 11.188 | 36.149 | -5.076 | 1.00   | 0.71 | C    |   |
| ATOM | 348 | CG  | LEUA | 172 | 12.518 | 36.746 | -4.600 | 1.00   | 0.71 | C    |   |
| ATOM | 349 | CD1 | LEUA | 172 | 13.323 | 35.677 | -3.872 | 1.00   | 0.71 | C    |   |
| ATOM | 350 | CD2 | LEUA | 172 | 13.348 | 37.319 | -5.754 | 1.00   | 0.71 | C    |   |
| ATOM | 351 | N   | SERA | 173 | 9.212  | 35.884 | -7.453 | 1.00   | 0.79 | N    |   |
| ATOM | 352 | CA  | SERA | 173 | 8.128  | 35.341 | -8.292 | 1.00   | 0.79 | C    |   |
| ATOM | 353 | C   | SERA | 173 | 7.606  | 33.965 | -7.850 | 1.00   | 0.79 | C    |   |
| ATOM | 354 | O   | SERA | 173 | 8.185  | 32.917 | -8.147 | 1.00   | 0.79 | O    |   |
| ATOM | 355 | CB  | SERA | 173 | 8.598  | 35.284 | -9.747 | 1.00   | 0.79 | C    |   |

|      |     |     |      |   |     |        |        |         |      |      |   |
|------|-----|-----|------|---|-----|--------|--------|---------|------|------|---|
| ATOM | 356 | OG  | SER  | A | 173 | 7.627  | 34.610 | -10.554 | 1.00 | 0.79 | O |
| ATOM | 357 | N   | GLU  | A | 174 | 6.429  | 33.987 | -7.233  | 1.00 | 0.80 | N |
| ATOM | 358 | CA  | GLU  | A | 174 | 5.654  | 32.749 | -6.970  | 1.00 | 0.80 | C |
| ATOM | 359 | C   | GLU  | A | 174 | 5.159  | 32.130 | -8.281  | 1.00 | 0.80 | C |
| ATOM | 360 | O   | GLU  | A | 174 | 5.145  | 30.910 | -8.450  | 1.00 | 0.80 | O |
| ATOM | 361 | CB  | GLU  | A | 174 | 4.410  | 32.960 | -6.101  | 1.00 | 0.80 | C |
| ATOM | 362 | CG  | GLU  | A | 174 | 4.729  | 33.422 | -4.679  | 1.00 | 0.80 | C |
| ATOM | 363 | CD  | GLU  | A | 174 | 5.019  | 34.926 | -4.525  | 1.00 | 0.80 | C |
| ATOM | 364 | OE1 | GLU  | A | 174 | 5.039  | 35.639 | -5.552  | 1.00 | 0.80 | O |
| ATOM | 365 | OE2 | GLU  | A | 174 | 5.140  | 35.363 | -3.365  | 1.00 | 0.80 | O |
| ATOM | 366 | N   | GLN  | A | 175 | 4.818  | 33.009 | -9.221  | 1.00 | 0.78 | N |
| ATOM | 367 | CA  | GLN  | A | 175 | 4.307  | 32.606 | -10.534 | 1.00 | 0.78 | C |
| ATOM | 368 | C   | GLN  | A | 175 | 5.287  | 31.736 | -11.334 | 1.00 | 0.78 | C |
| ATOM | 369 | O   | GLN  | A | 175 | 4.867  | 30.798 | -12.016 | 1.00 | 0.78 | O |
| ATOM | 370 | CB  | GLN  | A | 175 | 3.961  | 33.847 | -11.347 | 1.00 | 0.78 | C |
| ATOM | 371 | CG  | GLN  | A | 175 | 3.150  | 33.378 | -12.544 | 1.00 | 0.78 | C |
| ATOM | 372 | CD  | GLN  | A | 175 | 1.823  | 32.758 | -12.084 | 1.00 | 0.78 | C |
| ATOM | 373 | OE1 | GLN  | A | 175 | 1.008  | 33.334 | -11.370 | 1.00 | 0.78 | O |
| ATOM | 374 | NE2 | GLN  | A | 175 | 1.512  | 31.616 | -12.654 | 1.00 | 0.78 | N |
| ATOM | 375 | N   | GLU  | A | 176 | 6.576  | 32.035 | -11.193 | 1.00 | 0.78 | N |
| ATOM | 376 | CA  | GLU  | A | 176 | 7.625  | 31.262 | -11.880 | 1.00 | 0.78 | C |
| ATOM | 377 | C   | GLU  | A | 176 | 7.588  | 29.805 | -11.404 | 1.00 | 0.78 | C |
| ATOM | 378 | O   | GLU  | A | 176 | 7.580  | 28.893 | -12.221 | 1.00 | 0.78 | O |
| ATOM | 379 | CB  | GLU  | A | 176 | 9.011  | 31.839 | -11.602 | 1.00 | 0.78 | C |
| ATOM | 380 | CG  | GLU  | A | 176 | 10.075 | 31.124 | -12.445 | 1.00 | 0.78 | C |
| ATOM | 381 | CD  | GLU  | A | 176 | 11.501 | 31.570 | -12.118 | 1.00 | 0.78 | C |
| ATOM | 382 | OE1 | GLU  | A | 176 | 11.665 | 32.721 | -11.649 | 1.00 | 0.78 | O |
| ATOM | 383 | OE2 | GLU  | A | 176 | 12.389 | 30.706 | -12.259 | 1.00 | 0.78 | O |
| ATOM | 384 | N   | LEUA |   | 177 | 7.439  | 29.624 | -10.095 | 1.00 | 0.82 | N |
| ATOM | 385 | CA  | LEUA |   | 177 | 7.284  | 28.286 | -9.498  | 1.00 | 0.82 | C |
| ATOM | 386 | C   | LEUA |   | 177 | 6.052  | 27.557 | -10.035 | 1.00 | 0.82 | C |
| ATOM | 387 | O   | LEUA |   | 177 | 6.189  | 26.471 | -10.591 | 1.00 | 0.82 | O |
| ATOM | 388 | CB  | LEUA |   | 177 | 7.191  | 28.370 | -7.975  | 1.00 | 0.82 | C |
| ATOM | 389 | CG  | LEUA |   | 177 | 8.490  | 28.854 | -7.328  | 1.00 | 0.82 | C |
| ATOM | 390 | CD1 | LEUA |   | 177 | 8.286  | 28.963 | -5.817  | 1.00 | 0.82 | C |
| ATOM | 391 | CD2 | LEUA |   | 177 | 9.655  | 27.905 | -7.628  | 1.00 | 0.82 | C |
| ATOM | 392 | N   | VALA |   | 178 | 4.923  | 28.262 | -10.043 | 1.00 | 0.82 | N |
| ATOM | 393 | CA  | VALA |   | 178 | 3.652  | 27.725 | -10.574 | 1.00 | 0.82 | C |
| ATOM | 394 | C   | VALA |   | 178 | 3.821  | 27.244 | -12.026 | 1.00 | 0.82 | C |
| ATOM | 395 | O   | VALA |   | 178 | 3.445  | 26.121 | -12.349 | 1.00 | 0.82 | O |
| ATOM | 396 | CB  | VALA |   | 178 | 2.526  | 28.774 | -10.461 | 1.00 | 0.82 | C |
| ATOM | 397 | CG1 | VALA |   | 178 | 1.213  | 28.323 | -11.116 | 1.00 | 0.82 | C |

|      |     |     |       |     |        |        |         |      |      |   |
|------|-----|-----|-------|-----|--------|--------|---------|------|------|---|
| ATOM | 398 | CG2 | VALA  | 178 | 2.239  | 29.094 | -8.992  | 1.00 | 0.82 | C |
| ATOM | 399 | N   | ASP A | 179 | 4.375  | 28.117 | -12.862 | 1.00 | 0.80 | N |
| ATOM | 400 | CA  | ASP A | 179 | 4.501  | 27.839 | -14.304 | 1.00 | 0.80 | C |
| ATOM | 401 | C   | ASP A | 179 | 5.628  | 26.872 | -14.680 | 1.00 | 0.80 | C |
| ATOM | 402 | O   | ASP A | 179 | 5.442  | 26.013 | -15.537 | 1.00 | 0.80 | O |
| ATOM | 403 | CB  | ASP A | 179 | 4.673  | 29.136 | -15.094 | 1.00 | 0.80 | C |
| ATOM | 404 | CG  | ASP A | 179 | 3.469  | 30.077 | -14.995 | 1.00 | 0.80 | C |
| ATOM | 405 | OD1 | ASP A | 179 | 2.404  | 29.654 | -14.491 | 1.00 | 0.80 | O |
| ATOM | 406 | OD2 | ASP A | 179 | 3.628  | 31.256 | -15.375 | 1.00 | 0.80 | O |
| ATOM | 407 | N   | CYSA  | 180 | 6.769  | 27.028 | -14.020 | 1.00 | 0.83 | N |
| ATOM | 408 | CA  | CYSA  | 180 | 8.017  | 26.366 | -14.438 | 1.00 | 0.83 | C |
| ATOM | 409 | C   | CYSA  | 180 | 8.425  | 25.152 | -13.597 | 1.00 | 0.83 | C |
| ATOM | 410 | O   | CYSA  | 180 | 8.994  | 24.201 | -14.132 | 1.00 | 0.83 | O |
| ATOM | 411 | CB  | CYSA  | 180 | 9.150  | 27.393 | -14.459 | 1.00 | 0.83 | C |
| ATOM | 412 | SG  | CYSA  | 180 | 8.888  | 28.758 | -15.649 | 1.00 | 0.83 | S |
| ATOM | 413 | N   | ASP A | 181 | 8.167  | 25.195 | -12.292 | 1.00 | 0.80 | N |
| ATOM | 414 | CA  | ASP A | 181 | 8.476  | 24.058 | -11.409 | 1.00 | 0.80 | C |
| ATOM | 415 | C   | ASP A | 181 | 7.411  | 22.953 | -11.551 | 1.00 | 0.80 | C |
| ATOM | 416 | O   | ASP A | 181 | 6.536  | 22.807 | -10.700 | 1.00 | 0.80 | O |
| ATOM | 417 | CB  | ASP A | 181 | 8.618  | 24.570 | -9.969  | 1.00 | 0.80 | C |
| ATOM | 418 | CG  | ASP A | 181 | 9.039  | 23.475 | -8.988  | 1.00 | 0.80 | C |
| ATOM | 419 | OD1 | ASP A | 181 | 9.582  | 22.453 | -9.462  | 1.00 | 0.80 | O |
| ATOM | 420 | OD2 | ASP A | 181 | 8.875  | 23.738 | -7.780  | 1.00 | 0.80 | O |
| ATOM | 421 | N   | VALA  | 182 | 7.601  | 22.118 | -12.570 | 1.00 | 0.73 | N |
| ATOM | 422 | CA  | VALA  | 182 | 6.614  | 21.079 | -12.963 | 1.00 | 0.73 | C |
| ATOM | 423 | C   | VALA  | 182 | 7.114  | 19.622 | -12.827 | 1.00 | 0.73 | C |
| ATOM | 424 | O   | VALA  | 182 | 6.410  | 18.665 | -13.146 | 1.00 | 0.73 | O |
| ATOM | 425 | CB  | VALA  | 182 | 6.103  | 21.394 | -14.389 | 1.00 | 0.73 | C |
| ATOM | 426 | CG1 | VALA  | 182 | 7.219  | 21.328 | -15.439 | 1.00 | 0.73 | C |
| ATOM | 427 | CG2 | VALA  | 182 | 4.899  | 20.542 | -14.817 | 1.00 | 0.73 | C |
| ATOM | 428 | N   | SERA  | 183 | 8.359  | 19.444 | -12.406 | 1.00 | 0.67 | N |
| ATOM | 429 | CA  | SERA  | 183 | 8.921  | 18.084 | -12.331 | 1.00 | 0.67 | C |
| ATOM | 430 | C   | SERA  | 183 | 9.145  | 17.646 | -10.886 | 1.00 | 0.67 | C |
| ATOM | 431 | O   | SERA  | 183 | 9.117  | 18.458 | -9.959  | 1.00 | 0.67 | O |
| ATOM | 432 | CB  | SERA  | 183 | 10.217 | 17.970 | -13.135 | 1.00 | 0.67 | C |
| ATOM | 433 | OG  | SERA  | 183 | 10.619 | 16.596 | -13.154 | 1.00 | 0.67 | O |
| ATOM | 434 | N   | GLYA  | 184 | 9.209  | 16.319 | -10.731 | 1.00 | 0.67 | N |
| ATOM | 435 | CA  | GLYA  | 184 | 9.382  | 15.658 | -9.426  | 1.00 | 0.67 | C |
| ATOM | 436 | C   | GLYA  | 184 | 8.067  | 15.650 | -8.638  | 1.00 | 0.67 | C |
| ATOM | 437 | O   | GLYA  | 184 | 7.706  | 14.631 | -8.058  | 1.00 | 0.67 | O |
| ATOM | 438 | N   | VALA  | 185 | 7.362  | 16.780 | -8.666  | 1.00 | 0.68 | N |
| ATOM | 439 | CA  | VALA  | 185 | 6.057  | 16.927 | -7.994  | 1.00 | 0.68 | C |

|      |     |     |       |     |        |        |         |         |      |      |   |
|------|-----|-----|-------|-----|--------|--------|---------|---------|------|------|---|
| ATOM | 440 | C   | VALA  | 185 | 5.140  | 17.999 | -8.598  | 1.00    | 0.68 | C    |   |
| ATOM | 441 | O   | VALA  | 185 | 4.105  | 17.674 | -9.175  | 1.00    | 0.68 | O    |   |
| ATOM | 442 | CB  | VALA  | 185 | 6.247  | 17.086 | -6.464  | 1.00    | 0.68 | C    |   |
| ATOM | 443 | CG1 | VALA  | 185 | 7.024  | 18.321 | -6.078  | 1.00    | 0.68 | C    |   |
| ATOM | 444 | CG2 | VALA  | 185 | 4.939  | 17.176 | -5.681  | 1.00    | 0.68 | C    |   |
| ATOM | 445 | N   | ASP A | 186 | 5.544  | 19.252 | -8.389  | 1.00    | 0.76 | N    |   |
| ATOM | 446 | CA  | ASP A | 186 | 4.646  | 20.396 | -8.225  | 1.00    | 0.76 | C    |   |
| ATOM | 447 | C   | ASP A | 186 | 3.746  | 20.538 | -9.433  | 1.00    | 0.76 | C    |   |
| ATOM | 448 | O   | ASP A | 186 | 4.167  | 20.325 | -10.568 | 1.00    | 0.76 | O    |   |
| ATOM | 449 | CB  | ASP A | 186 | 5.459  | 21.675 | -8.008  | 1.00    | 0.76 | C    |   |
| ATOM | 450 | CG  | ASP A | 186 | 6.290  | 21.594 | -6.725  | 1.00    | 0.76 | C    |   |
| ATOM | 451 | OD1 | ASP A | 186 | 5.753  | 21.105 | -5.714  | 1.00    | 0.76 | O    |   |
| ATOM | 452 | OD2 | ASP A | 186 | 7.501  | 21.836 | -6.794  | 1.00    | 0.76 | O    |   |
| ATOM | 453 | N   | GLN   | A   | 187    | 2.492  | 20.798  | -9.127  | 1.00 | 0.74 | N |
| ATOM | 454 | CA  | GLN   | A   | 187    | 1.554  | 20.917  | -10.244 | 1.00 | 0.74 | C |
| ATOM | 455 | C   | GLN   | A   | 187    | 0.789  | 22.264  | -10.222 | 1.00 | 0.74 | C |
| ATOM | 456 | O   | GLN   | A   | 187    | -0.407 | 22.414  | -10.468 | 1.00 | 0.74 | O |
| ATOM | 457 | CB  | GLN   | A   | 187    | 0.736  | 19.623  | -10.430 | 1.00 | 0.74 | C |
| ATOM | 458 | CG  | GLN   | A   | 187    | 1.010  | 18.210  | -9.898  | 1.00 | 0.74 | C |
| ATOM | 459 | CD  | GLN   | A   | 187    | -0.280 | 17.377  | -9.718  | 1.00 | 0.74 | C |
| ATOM | 460 | OE1 | GLN   | A   | 187    | -1.382 | 17.606  | -10.203 | 1.00 | 0.74 | O |
| ATOM | 461 | NE2 | GLN   | A   | 187    | -0.107 | 16.344  | -8.933  | 1.00 | 0.74 | N |
| ATOM | 462 | N   | GLYA  | 188 | 1.567  | 23.316 | -9.933  | 1.00    | 0.84 | N    |   |
| ATOM | 463 | CA  | GLYA  | 188 | 1.093  | 24.715 | -10.005 | 1.00    | 0.84 | C    |   |
| ATOM | 464 | C   | GLYA  | 188 | -0.109 | 24.966 | -9.086  | 1.00    | 0.84 | C    |   |
| ATOM | 465 | O   | GLYA  | 188 | -0.058 | 24.677 | -7.890  | 1.00    | 0.84 | O    |   |
| ATOM | 466 | N   | CYSA  | 189 | -1.209 | 25.395 | -9.698  | 1.00    | 0.83 | N    |   |
| ATOM | 467 | CA  | CYSA  | 189 | -2.479 | 25.659 | -8.988  | 1.00    | 0.83 | C    |   |
| ATOM | 468 | C   | CYSA  | 189 | -3.178 | 24.420 | -8.410  | 1.00    | 0.83 | C    |   |
| ATOM | 469 | O   | CYSA  | 189 | -4.204 | 24.554 | -7.745  | 1.00    | 0.83 | O    |   |
| ATOM | 470 | CB  | CYSA  | 189 | -3.478 | 26.385 | -9.888  | 1.00    | 0.83 | C    |   |
| ATOM | 471 | SG  | CYSA  | 189 | -2.865 | 27.977 | -10.540 | 1.00    | 0.83 | S    |   |
| ATOM | 472 | N   | ASP A | 190 | -2.622 | 23.232 | -8.616  | 1.00    | 0.84 | N    |   |
| ATOM | 473 | CA  | ASP A | 190 | -3.255 | 22.023 | -8.043  | 1.00    | 0.84 | C    |   |
| ATOM | 474 | C   | ASP A | 190 | -2.455 | 21.433 | -6.852  | 1.00    | 0.84 | C    |   |
| ATOM | 475 | O   | ASP A | 190 | -2.504 | 20.226 | -6.601  | 1.00    | 0.84 | O    |   |
| ATOM | 476 | CB  | ASP A | 190 | -3.506 | 21.023 | -9.193  | 1.00    | 0.84 | C    |   |
| ATOM | 477 | CG  | ASP A | 190 | -2.190 | 20.486 | -9.757  | 1.00    | 0.84 | C    |   |
| ATOM | 478 | OD1 | ASP A | 190 | -1.254 | 20.541 | -8.930  | 1.00    | 0.84 | O    |   |
| ATOM | 479 | OD2 | ASP A | 190 | -2.109 | 20.218 | -10.970 | 1.00    | 0.84 | O    |   |
| ATOM | 480 | N   | GLYA  | 191 | -1.518 | 22.238 | -6.317  | 1.00    | 0.87 | N    |   |
| ATOM | 481 | CA  | GLYA  | 191 | -0.679 | 21.818 | -5.183  | 1.00    | 0.87 | C    |   |

|      |     |     |       |     |        |        |        |        |      |      |   |
|------|-----|-----|-------|-----|--------|--------|--------|--------|------|------|---|
| ATOM | 482 | C   | GLYA  | 191 | 0.775  | 21.509 | -5.563 | 1.00   | 0.87 | C    |   |
| ATOM | 483 | O   | GLYA  | 191 | 1.152  | 21.361 | -6.727 | 1.00   | 0.87 | O    |   |
| ATOM | 484 | N   | GLYA  | 192 | 1.584  | 21.482 | -4.504 | 1.00   | 0.85 | N    |   |
| ATOM | 485 | CA  | GLYA  | 192 | 3.019  | 21.177 | -4.590 | 1.00   | 0.85 | C    |   |
| ATOM | 486 | C   | GLYA  | 192 | 3.622  | 21.077 | -3.186 | 1.00   | 0.85 | C    |   |
| ATOM | 487 | O   | GLYA  | 192 | 2.905  | 21.079 | -2.186 | 1.00   | 0.85 | O    |   |
| ATOM | 488 | N   | LEUA  | 193 | 4.945  | 21.038 | -3.145 | 1.00   | 0.84 | N    |   |
| ATOM | 489 | CA  | LEUA  | 193 | 5.713  | 20.909 | -1.900 | 1.00   | 0.84 | C    |   |
| ATOM | 490 | C   | LEUA  | 193 | 6.867  | 21.917 | -1.916 | 1.00   | 0.84 | C    |   |
| ATOM | 491 | O   | LEUA  | 193 | 7.579  | 22.035 | -2.914 | 1.00   | 0.84 | O    |   |
| ATOM | 492 | CB  | LEUA  | 193 | 6.228  | 19.466 | -1.814 | 1.00   | 0.84 | C    |   |
| ATOM | 493 | CG  | LEUA  | 193 | 6.780  | 19.098 | -0.433 | 1.00   | 0.84 | C    |   |
| ATOM | 494 | CD1 | LEUA  | 193 | 5.690  | 19.160 | 0.643  | 1.00   | 0.84 | C    |   |
| ATOM | 495 | CD2 | LEUA  | 193 | 7.395  | 17.698 | -0.482 | 1.00   | 0.84 | C    |   |
| ATOM | 496 | N   | MET   | A   | 194    | 7.131  | 22.511 | -0.755 | 1.00 | 0.84 | N |
| ATOM | 497 | CA  | MET   | A   | 194    | 8.199  | 23.530 | -0.631 | 1.00 | 0.84 | C |
| ATOM | 498 | C   | MET   | A   | 194    | 9.598  | 22.977 | -0.907 | 1.00 | 0.84 | C |
| ATOM | 499 | O   | MET   | A   | 194    | 10.367 | 23.581 | -1.650 | 1.00 | 0.84 | O |
| ATOM | 500 | CB  | MET   | A   | 194    | 8.232  | 24.216 | 0.736  | 1.00 | 0.84 | C |
| ATOM | 501 | CG  | MET   | A   | 194    | 6.997  | 25.082 | 0.952  | 1.00 | 0.84 | C |
| ATOM | 502 | SD  | MET   | A   | 194    | 5.505  | 24.080 | 1.278  | 1.00 | 0.84 | S |
| ATOM | 503 | CE  | MET   | A   | 194    | 5.729  | 23.719 | 3.007  | 1.00 | 0.84 | C |
| ATOM | 504 | N   | ASP A | 195 | 9.859  | 21.763 | -0.421 | 1.00   | 0.85 | N    |   |
| ATOM | 505 | CA  | ASP A | 195 | 11.161 | 21.105 | -0.645 | 1.00   | 0.85 | C    |   |
| ATOM | 506 | C   | ASP A | 195 | 11.525 | 20.945 | -2.120 | 1.00   | 0.85 | C    |   |
| ATOM | 507 | O   | ASP A | 195 | 12.645 | 21.262 | -2.505 | 1.00   | 0.85 | O    |   |
| ATOM | 508 | CB  | ASP A | 195 | 11.258 | 19.743 | 0.045  | 1.00   | 0.85 | C    |   |
| ATOM | 509 | CG  | ASP A | 195 | 11.468 | 19.877 | 1.554  | 1.00   | 0.85 | C    |   |
| ATOM | 510 | OD1 | ASP A | 195 | 11.973 | 20.942 | 1.979  | 1.00   | 0.85 | O    |   |
| ATOM | 511 | OD2 | ASP A | 195 | 11.104 | 18.910 | 2.250  | 1.00   | 0.85 | O    |   |
| ATOM | 512 | N   | ASN   | A   | 196    | 10.544 | 20.580 | -2.936 | 1.00 | 0.81 | N |
| ATOM | 513 | CA  | ASN   | A   | 196    | 10.801 | 20.462 | -4.380 | 1.00 | 0.81 | C |
| ATOM | 514 | C   | ASN   | A   | 196    | 11.010 | 21.820 | -5.059 | 1.00 | 0.81 | C |
| ATOM | 515 | O   | ASN   | A   | 196    | 11.830 | 21.939 | -5.966 | 1.00 | 0.81 | O |
| ATOM | 516 | CB  | ASN   | A   | 196    | 9.626  | 19.784 | -5.031 | 1.00 | 0.81 | C |
| ATOM | 517 | CG  | ASN   | A   | 196    | 9.888  | 19.482 | -6.508 | 1.00 | 0.81 | C |
| ATOM | 518 | OD1 | ASN   | A   | 196    | 9.648  | 20.283 | -7.396 | 1.00 | 0.81 | O |
| ATOM | 519 | ND2 | ASN   | A   | 196    | 10.229 | 18.244 | -6.783 | 1.00 | 0.81 | N |
| ATOM | 520 | N   | ALA   | A   | 197    | 10.333 | 22.834 | -4.524 | 1.00 | 0.86 | N |
| ATOM | 521 | CA  | ALA   | A   | 197    | 10.454 | 24.221 | -5.007 | 1.00 | 0.86 | C |
| ATOM | 522 | C   | ALA   | A   | 197    | 11.846 | 24.803 | -4.721 | 1.00 | 0.86 | C |
| ATOM | 523 | O   | ALA   | A   | 197    | 12.437 | 25.455 | -5.579 | 1.00 | 0.86 | O |

|      |     |     |      |     |        |        |         |        |      |      |   |
|------|-----|-----|------|-----|--------|--------|---------|--------|------|------|---|
| ATOM | 524 | CB  | ALA  | A   | 197    | 9.372  | 25.086  | -4.361 | 1.00 | 0.86 | C |
| ATOM | 525 | N   | PHEA | 198 | 12.403 | 24.459 | -3.561  | 1.00   | 0.84 | N    |   |
| ATOM | 526 | CA  | PHEA | 198 | 13.773 | 24.853 | -3.187  | 1.00   | 0.84 | C    |   |
| ATOM | 527 | C   | PHEA | 198 | 14.825 | 24.174 | -4.073  | 1.00   | 0.84 | C    |   |
| ATOM | 528 | O   | PHEA | 198 | 15.777 | 24.788 | -4.543  | 1.00   | 0.84 | O    |   |
| ATOM | 529 | CB  | PHEA | 198 | 14.065 | 24.487 | -1.739  | 1.00   | 0.84 | C    |   |
| ATOM | 530 | CG  | PHEA | 198 | 13.328 | 25.329 | -0.703  | 1.00   | 0.84 | C    |   |
| ATOM | 531 | CD1 | PHEA | 198 | 13.338 | 26.717 | -0.778  | 1.00   | 0.84 | C    |   |
| ATOM | 532 | CD2 | PHEA | 198 | 12.720 | 24.684 | 0.364   | 1.00   | 0.84 | C    |   |
| ATOM | 533 | CE1 | PHEA | 198 | 12.740 | 27.463 | 0.227   | 1.00   | 0.84 | C    |   |
| ATOM | 534 | CE2 | PHEA | 198 | 12.123 | 25.432 | 1.369   | 1.00   | 0.84 | C    |   |
| ATOM | 535 | CZ  | PHEA | 198 | 12.136 | 26.820 | 1.301   | 1.00   | 0.84 | C    |   |
| ATOM | 536 | N   | GLN  | A   | 199    | 14.558 | 22.914  | -4.390 | 1.00 | 0.79 | N |
| ATOM | 537 | CA  | GLN  | A   | 199    | 15.400 | 22.172  | -5.347 | 1.00 | 0.79 | C |
| ATOM | 538 | C   | GLN  | A   | 199    | 15.367 | 22.872  | -6.714 | 1.00 | 0.79 | C |
| ATOM | 539 | O   | GLN  | A   | 199    | 16.405 | 23.006  | -7.356 | 1.00 | 0.79 | O |
| ATOM | 540 | CB  | GLN  | A   | 199    | 14.916 | 20.733  | -5.512 | 1.00 | 0.79 | C |
| ATOM | 541 | CG  | GLN  | A   | 199    | 14.965 | 20.017  | -4.172 | 1.00 | 0.79 | C |
| ATOM | 542 | CD  | GLN  | A   | 199    | 14.555 | 18.556  | -4.212 | 1.00 | 0.79 | C |
| ATOM | 543 | OE1 | GLN  | A   | 199    | 15.074 | 17.748  | -4.965 | 1.00 | 0.79 | O |
| ATOM | 544 | NE2 | GLN  | A   | 199    | 13.634 | 18.194  | -3.346 | 1.00 | 0.79 | N |
| ATOM | 545 | N   | PHEA | 200 | 14.191 | 23.420 | -7.033  | 1.00   | 0.80 | N    |   |
| ATOM | 546 | CA  | PHEA | 200 | 13.945 | 24.136 | -8.312  | 1.00   | 0.80 | C    |   |
| ATOM | 547 | C   | PHEA | 200 | 14.807 | 25.348 | -8.490  | 1.00   | 0.80 | C    |   |
| ATOM | 548 | O   | PHEA | 200 | 15.578 | 25.504 | -9.431  | 1.00   | 0.80 | O    |   |
| ATOM | 549 | CB  | PHEA | 200 | 12.458 | 24.449 | -8.533  | 1.00   | 0.80 | C    |   |
| ATOM | 550 | CG  | PHEA | 200 | 12.244 | 25.203 | -9.855  | 1.00   | 0.80 | C    |   |
| ATOM | 551 | CD1 | PHEA | 200 | 12.080 | 24.660 | -11.136 | 1.00   | 0.80 | C    |   |
| ATOM | 552 | CD2 | PHEA | 200 | 12.181 | 26.572 | -9.712  | 1.00   | 0.80 | C    |   |
| ATOM | 553 | CE1 | PHEA | 200 | 11.828 | 25.454 | -12.232 | 1.00   | 0.80 | C    |   |
| ATOM | 554 | CE2 | PHEA | 200 | 11.939 | 27.378 | -10.811 | 1.00   | 0.80 | C    |   |
| ATOM | 555 | CZ  | PHEA | 200 | 11.755 | 26.823 | -12.069 | 1.00   | 0.80 | C    |   |
| ATOM | 556 | N   | VALA | 201 | 14.699 | 26.163 | -7.464  | 1.00   | 0.82 | N    |   |
| ATOM | 557 | CA  | VALA | 201 | 15.447 | 27.412 | -7.411  | 1.00   | 0.82 | C    |   |
| ATOM | 558 | C   | VALA | 201 | 16.961 | 27.145 | -7.375  | 1.00   | 0.82 | C    |   |
| ATOM | 559 | O   | VALA | 201 | 17.702 | 27.815 | -8.090  | 1.00   | 0.82 | O    |   |
| ATOM | 560 | CB  | VALA | 201 | 14.905 | 28.276 | -6.262  | 1.00   | 0.82 | C    |   |
| ATOM | 561 | CG1 | VALA | 201 | 14.928 | 27.562 | -4.925  | 1.00   | 0.82 | C    |   |
| ATOM | 562 | CG2 | VALA | 201 | 15.659 | 29.593 | -6.114  | 1.00   | 0.82 | C    |   |
| ATOM | 563 | N   | ALA  | A   | 202    | 17.372 | 26.098  | -6.659 | 1.00 | 0.84 | N |
| ATOM | 564 | CA  | ALA  | A   | 202    | 18.791 | 25.711  | -6.566 | 1.00 | 0.84 | C |
| ATOM | 565 | C   | ALA  | A   | 202    | 19.349 | 25.296  | -7.936 | 1.00 | 0.84 | C |



|      |     |     |      |     |        |        |         |         |      |      |   |
|------|-----|-----|------|-----|--------|--------|---------|---------|------|------|---|
| ATOM | 566 | O   | ALA  | A   | 202    | 20.328 | 25.873  | -8.405  | 1.00 | 0.84 | O |
| ATOM | 567 | CB  | ALA  | A   | 202    | 18.956 | 24.568  | -5.562  | 1.00 | 0.84 | C |
| ATOM | 568 | N   | ARG  | A   | 203    | 18.580 | 24.464  | -8.637  | 1.00 | 0.73 | N |
| ATOM | 569 | CA  | ARG  | A   | 203    | 18.957 | 23.950  | -9.968  | 1.00 | 0.73 | C |
| ATOM | 570 | C   | ARG  | A   | 203    | 18.890 | 24.994  | -11.092 | 1.00 | 0.73 | C |
| ATOM | 571 | O   | ARG  | A   | 203    | 19.669 | 24.931  | -12.040 | 1.00 | 0.73 | O |
| ATOM | 572 | CB  | ARG  | A   | 203    | 18.140 | 22.704  | -10.336 | 1.00 | 0.73 | C |
| ATOM | 573 | CG  | ARG  | A   | 203    | 16.638 | 22.961  | -10.487 | 1.00 | 0.73 | C |
| ATOM | 574 | CD  | ARG  | A   | 203    | 15.900 | 21.703  | -10.944 | 1.00 | 0.73 | C |
| ATOM | 575 | NE  | ARG  | A   | 203    | 14.440 | 21.899  | -11.001 | 1.00 | 0.73 | N |
| ATOM | 576 | CZ  | ARG  | A   | 203    | 13.588 | 21.722  | -9.991  | 1.00 | 0.73 | C |
| ATOM | 577 | NH1 | ARG  | A   | 203    | 14.014 | 21.396  | -8.781  | 1.00 | 0.73 | N |
| ATOM | 578 | NH2 | ARG  | A   | 203    | 12.298 | 21.943  | -10.103 | 1.00 | 0.73 | N |
| ATOM | 579 | N   | ARG  | A   | 204    | 17.954 | 25.934  | -10.974 | 1.00 | 0.71 | N |
| ATOM | 580 | CA  | ARG  | A   | 204    | 17.791 | 27.012  | -11.969 | 1.00 | 0.71 | C |
| ATOM | 581 | C   | ARG  | A   | 204    | 18.864 | 28.099  | -11.854 | 1.00 | 0.71 | C |
| ATOM | 582 | O   | ARG  | A   | 204    | 19.012 | 28.935  | -12.744 | 1.00 | 0.71 | O |
| ATOM | 583 | CB  | ARG  | A   | 204    | 16.393 | 27.638  | -11.888 | 1.00 | 0.71 | C |
| ATOM | 584 | CG  | ARG  | A   | 204    | 15.276 | 26.661  | -12.276 | 1.00 | 0.71 | C |
| ATOM | 585 | CD  | ARG  | A   | 204    | 15.523 | 25.895  | -13.580 | 1.00 | 0.71 | C |
| ATOM | 586 | NE  | ARG  | A   | 204    | 15.845 | 26.813  | -14.688 | 1.00 | 0.71 | N |
| ATOM | 587 | CZ  | ARG  | A   | 204    | 15.789 | 26.501  | -15.981 | 1.00 | 0.71 | C |
| ATOM | 588 | NH1 | ARG  | A   | 204    | 15.381 | 25.299  | -16.367 | 1.00 | 0.71 | N |
| ATOM | 589 | NH2 | ARG  | A   | 204    | 16.182 | 27.370  | -16.902 | 1.00 | 0.71 | N |
| ATOM | 590 | N   | GLYA | 205 | 19.530 | 28.087 | -10.693 | 1.00    | 0.76 | N    |   |
| ATOM | 591 | CA  | GLYA | 205 | 20.526 | 29.103 | -10.317 | 1.00    | 0.76 | C    |   |
| ATOM | 592 | C   | GLYA | 205 | 19.840 | 30.364 | -9.776  | 1.00    | 0.76 | C    |   |
| ATOM | 593 | O   | GLYA | 205 | 20.426 | 31.445 | -9.756  | 1.00    | 0.76 | O    |   |
| ATOM | 594 | N   | GLYA | 206 | 18.621 | 30.158 | -9.265  | 1.00    | 0.77 | N    |   |
| ATOM | 595 | CA  | GLYA | 206 | 17.832 | 31.210 | -8.624  | 1.00    | 0.77 | C    |   |
| ATOM | 596 | C   | GLYA | 206 | 16.417 | 31.350 | -9.186  | 1.00    | 0.77 | C    |   |
| ATOM | 597 | O   | GLYA | 206 | 15.961 | 30.579 | -10.027 | 1.00    | 0.77 | O    |   |
| ATOM | 598 | N   | LEUA | 207 | 15.726 | 32.309 | -8.593  | 1.00    | 0.74 | N    |   |
| ATOM | 599 | CA  | LEUA | 207 | 14.340 | 32.657 | -8.939  | 1.00    | 0.74 | C    |   |
| ATOM | 600 | C   | LEUA | 207 | 14.296 | 34.156 | -9.278  | 1.00    | 0.74 | C    |   |
| ATOM | 601 | O   | LEUA | 207 | 15.001 | 34.964 | -8.667  | 1.00    | 0.74 | O    |   |
| ATOM | 602 | CB  | LEUA | 207 | 13.475 | 32.268 | -7.730  | 1.00    | 0.74 | C    |   |
| ATOM | 603 | CG  | LEUA | 207 | 11.965 | 32.354 | -7.963  | 1.00    | 0.74 | C    |   |
| ATOM | 604 | CD1 | LEUA | 207 | 11.213 | 31.483 | -6.963  | 1.00    | 0.74 | C    |   |
| ATOM | 605 | CD2 | LEUA | 207 | 11.499 | 33.756 | -7.641  | 1.00    | 0.74 | C    |   |
| ATOM | 606 | N   | ALA  | A   | 208    | 13.490 | 34.486  | -10.282 | 1.00 | 0.70 | N |
| ATOM | 607 | CA  | ALA  | A   | 208    | 13.334 | 35.868  | -10.776 | 1.00 | 0.70 | C |

|      |     |     |      |   |     |        |        |         |      |      |   |
|------|-----|-----|------|---|-----|--------|--------|---------|------|------|---|
| ATOM | 608 | C   | ALA  | A | 208 | 12.445 | 36.727 | -9.859  | 1.00 | 0.70 | C |
| ATOM | 609 | O   | ALA  | A | 208 | 11.705 | 36.241 | -9.010  | 1.00 | 0.70 | O |
| ATOM | 610 | CB  | ALA  | A | 208 | 12.776 | 35.836 | -12.202 | 1.00 | 0.70 | C |
| ATOM | 611 | N   | SERA | A | 209 | 12.534 | 38.036 | -10.027 | 1.00 | 0.69 | N |
| ATOM | 612 | CA  | SERA | A | 209 | 11.716 | 38.974 | -9.231  | 1.00 | 0.69 | C |
| ATOM | 613 | C   | SERA | A | 209 | 10.221 | 38.883 | -9.579  | 1.00 | 0.69 | C |
| ATOM | 614 | O   | SERA | A | 209 | 9.835  | 38.513 | -10.690 | 1.00 | 0.69 | O |
| ATOM | 615 | CB  | SERA | A | 209 | 12.230 | 40.403 | -9.422  | 1.00 | 0.69 | C |
| ATOM | 616 | OG  | SERA | A | 209 | 11.455 | 41.313 | -8.636  | 1.00 | 0.69 | O |
| ATOM | 617 | N   | GLU  | A | 210 | 9.404  | 39.317 | -8.622  | 1.00 | 0.69 | N |
| ATOM | 618 | CA  | GLU  | A | 210 | 7.946  | 39.472 | -8.791  | 1.00 | 0.69 | C |
| ATOM | 619 | C   | GLU  | A | 210 | 7.625  | 40.412 | -9.963  | 1.00 | 0.69 | C |
| ATOM | 620 | O   | GLU  | A | 210 | 6.767  | 40.103 | -10.780 | 1.00 | 0.69 | O |
| ATOM | 621 | CB  | GLU  | A | 210 | 7.361  | 40.061 | -7.503  | 1.00 | 0.69 | C |
| ATOM | 622 | CG  | GLU  | A | 210 | 5.841  | 40.275 | -7.549  | 1.00 | 0.69 | C |
| ATOM | 623 | CD  | GLU  | A | 210 | 5.045  | 38.983 | -7.772  | 1.00 | 0.69 | C |
| ATOM | 624 | OE1 | GLU  | A | 210 | 5.513  | 37.906 | -7.342  | 1.00 | 0.69 | O |
| ATOM | 625 | OE2 | GLU  | A | 210 | 3.953  | 39.096 | -8.373  | 1.00 | 0.69 | O |
| ATOM | 626 | N   | SERA | A | 211 | 8.357  | 41.519 | -10.039 | 1.00 | 0.68 | N |
| ATOM | 627 | CA  | SERA | A | 211 | 8.189  | 42.526 | -11.108 | 1.00 | 0.68 | C |
| ATOM | 628 | C   | SERA | A | 211 | 8.393  | 41.936 | -12.512 | 1.00 | 0.68 | C |
| ATOM | 629 | O   | SERA | A | 211 | 7.630  | 42.234 | -13.425 | 1.00 | 0.68 | O |
| ATOM | 630 | CB  | SERA | A | 211 | 9.175  | 43.682 | -10.907 | 1.00 | 0.68 | C |
| ATOM | 631 | OG  | SERA | A | 211 | 10.523 | 43.193 | -10.890 | 1.00 | 0.68 | O |
| ATOM | 632 | N   | GLYA | A | 212 | 9.385  | 41.038 | -12.609 | 1.00 | 0.68 | N |
| ATOM | 633 | CA  | GLYA | A | 212 | 9.749  | 40.364 | -13.869 | 1.00 | 0.68 | C |
| ATOM | 634 | C   | GLYA | A | 212 | 8.724  | 39.298 | -14.273 | 1.00 | 0.68 | C |
| ATOM | 635 | O   | GLYA | A | 212 | 8.420  | 39.128 | -15.452 | 1.00 | 0.68 | O |
| ATOM | 636 | N   | TYR  | A | 213 | 8.245  | 38.572 | -13.267 | 1.00 | 0.71 | N |
| ATOM | 637 | CA  | TYR  | A | 213 | 7.304  | 37.461 | -13.464 | 1.00 | 0.71 | C |
| ATOM | 638 | C   | TYR  | A | 213 | 6.174  | 37.561 | -12.415 | 1.00 | 0.71 | C |
| ATOM | 639 | O   | TYR  | A | 213 | 6.151  | 36.810 | -11.436 | 1.00 | 0.71 | O |
| ATOM | 640 | CB  | TYR  | A | 213 | 8.126  | 36.172 | -13.366 | 1.00 | 0.71 | C |
| ATOM | 641 | CG  | TYR  | A | 213 | 7.547  | 34.973 | -14.120 | 1.00 | 0.71 | C |
| ATOM | 642 | CD1 | TYR  | A | 213 | 6.187  | 34.808 | -14.366 | 1.00 | 0.71 | C |
| ATOM | 643 | CD2 | TYR  | A | 213 | 8.446  | 34.022 | -14.579 | 1.00 | 0.71 | C |
| ATOM | 644 | CE1 | TYR  | A | 213 | 5.738  | 33.700 | -15.071 | 1.00 | 0.71 | C |
| ATOM | 645 | CE2 | TYR  | A | 213 | 8.004  | 32.916 | -15.289 | 1.00 | 0.71 | C |
| ATOM | 646 | CZ  | TYR  | A | 213 | 6.648  | 32.757 | -15.536 | 1.00 | 0.71 | C |
| ATOM | 647 | OH  | TYR  | A | 213 | 6.219  | 31.685 | -16.251 | 1.00 | 0.71 | O |
| ATOM | 648 | N   | PROA | A | 214 | 5.235  | 38.493 | -12.627 | 1.00 | 0.76 | N |
| ATOM | 649 | CA  | PROA | A | 214 | 4.170  | 38.805 | -11.656 | 1.00 | 0.76 | C |

|      |     |     |      |     |        |        |         |         |      |      |   |
|------|-----|-----|------|-----|--------|--------|---------|---------|------|------|---|
| ATOM | 650 | C   | PROA | 214 | 3.144  | 37.680 | -11.527 | 1.00    | 0.76 | C    |   |
| ATOM | 651 | O   | PROA | 214 | 2.902  | 36.946 | -12.480 | 1.00    | 0.76 | O    |   |
| ATOM | 652 | CB  | PROA | 214 | 3.546  | 40.100 | -12.174 | 1.00    | 0.76 | C    |   |
| ATOM | 653 | CG  | PROA | 214 | 3.741  | 40.006 | -13.687 | 1.00    | 0.76 | C    |   |
| ATOM | 654 | CD  | PROA | 214 | 5.111  | 39.346 | -13.826 | 1.00    | 0.76 | C    |   |
| ATOM | 655 | N   | TYR  | A   | 215    | 2.606  | 37.556  | -10.321 | 1.00 | 0.75 | N |
| ATOM | 656 | CA  | TYR  | A   | 215    | 1.592  | 36.551  | -9.975  | 1.00 | 0.75 | C |
| ATOM | 657 | C   | TYR  | A   | 215    | 0.234  | 36.948  | -10.551 | 1.00 | 0.75 | C |
| ATOM | 658 | O   | TYR  | A   | 215    | -0.248 | 38.064  | -10.362 | 1.00 | 0.75 | O |
| ATOM | 659 | CB  | TYR  | A   | 215    | 1.492  | 36.442  | -8.453  | 1.00 | 0.75 | C |
| ATOM | 660 | CG  | TYR  | A   | 215    | 0.574  | 35.292  | -8.047  | 1.00 | 0.75 | C |
| ATOM | 661 | CD1 | TYR  | A   | 215    | 0.989  | 33.992  | -8.304  | 1.00 | 0.75 | C |
| ATOM | 662 | CD2 | TYR  | A   | 215    | -0.630 | 35.554  | -7.398  | 1.00 | 0.75 | C |
| ATOM | 663 | CE1 | TYR  | A   | 215    | 0.198  | 32.936  | -7.909  | 1.00 | 0.75 | C |
| ATOM | 664 | CE2 | TYR  | A   | 215    | -1.423 | 34.502  | -6.988  | 1.00 | 0.75 | C |
| ATOM | 665 | CZ  | TYR  | A   | 215    | -0.989 | 33.221  | -7.258  | 1.00 | 0.75 | C |
| ATOM | 666 | OH  | TYR  | A   | 215    | -1.807 | 32.206  | -7.012  | 1.00 | 0.75 | O |
| ATOM | 667 | N   | GLN  | A   | 216    | -0.427 | 35.940  | -11.079 | 1.00 | 0.70 | N |
| ATOM | 668 | CA  | GLN  | A   | 216    | -1.743 | 36.178  | -11.690 | 1.00 | 0.70 | C |
| ATOM | 669 | C   | GLN  | A   | 216    | -2.776 | 35.092  | -11.340 | 1.00 | 0.70 | C |
| ATOM | 670 | O   | GLN  | A   | 216    | -3.785 | 34.921  | -12.021 | 1.00 | 0.70 | O |
| ATOM | 671 | CB  | GLN  | A   | 216    | -1.433 | 36.264  | -13.170 | 1.00 | 0.70 | C |
| ATOM | 672 | CG  | GLN  | A   | 216    | -1.132 | 34.860  | -13.709 | 1.00 | 0.70 | C |
| ATOM | 673 | CD  | GLN  | A   | 216    | 0.306  | 34.541  | -13.884 | 1.00 | 0.70 | C |
| ATOM | 674 | OE1 | GLN  | A   | 216    | 1.174  | 35.240  | -13.394 | 1.00 | 0.70 | O |
| ATOM | 675 | NE2 | GLN  | A   | 216    | 0.558  | 33.393  | -14.471 | 1.00 | 0.70 | N |
| ATOM | 676 | N   | CYSA | 217 | -2.380 | 34.271 | -10.369 | 1.00    | 0.75 | N    |   |
| ATOM | 677 | CA  | CYSA | 217 | -3.216 | 33.200 | -9.801  | 1.00    | 0.75 | C    |   |
| ATOM | 678 | C   | CYSA | 217 | -3.881 | 32.329 | -10.886 | 1.00    | 0.75 | C    |   |
| ATOM | 679 | O   | CYSA | 217 | -5.097 | 32.303 | -11.055 | 1.00    | 0.75 | O    |   |
| ATOM | 680 | CB  | CYSA | 217 | -4.244 | 33.860 | -8.873  | 1.00    | 0.75 | C    |   |
| ATOM | 681 | SG  | CYSA | 217 | -5.446 | 32.660 | -8.205  | 1.00    | 0.75 | S    |   |
| ATOM | 682 | N   | ARG  | A   | 218    | -3.040 | 31.616  | -11.623 | 1.00 | 0.66 | N |
| ATOM | 683 | CA  | ARG  | A   | 218    | -3.486 | 30.718  | -12.709 | 1.00 | 0.66 | C |
| ATOM | 684 | C   | ARG  | A   | 218    | -2.308 | 29.882  | -13.217 | 1.00 | 0.66 | C |
| ATOM | 685 | O   | ARG  | A   | 218    | -1.145 | 30.235  | -13.005 | 1.00 | 0.66 | O |
| ATOM | 686 | CB  | ARG  | A   | 218    | -4.140 | 31.487  | -13.875 | 1.00 | 0.66 | C |
| ATOM | 687 | CG  | ARG  | A   | 218    | -3.176 | 32.405  | -14.631 | 1.00 | 0.66 | C |
| ATOM | 688 | CD  | ARG  | A   | 218    | -3.861 | 33.122  | -15.800 | 1.00 | 0.66 | C |
| ATOM | 689 | NE  | ARG  | A   | 218    | -2.935 | 34.017  | -16.525 | 1.00 | 0.66 | N |
| ATOM | 690 | CZ  | ARG  | A   | 218    | -2.694 | 35.303  | -16.246 | 1.00 | 0.66 | C |
| ATOM | 691 | NH1 | ARG  | A   | 218    | -3.333 | 35.887  | -15.245 | 1.00 | 0.66 | N |

|      |     |          |   |     |        |        |         |      |      |   |
|------|-----|----------|---|-----|--------|--------|---------|------|------|---|
| ATOM | 692 | NH2ARG   | A | 218 | -1.671 | 35.944 | -16.809 | 1.00 | 0.66 | N |
| ATOM | 693 | N ASPA   |   | 219 | -2.647 | 28.733 | -13.794 | 1.00 | 0.75 | N |
| ATOM | 694 | CA ASPA  |   | 219 | -1.649 | 27.836 | -14.405 | 1.00 | 0.75 | C |
| ATOM | 695 | C ASPA   |   | 219 | -1.208 | 28.351 | -15.779 | 1.00 | 0.75 | C |
| ATOM | 696 | O ASPA   |   | 219 | -1.860 | 28.113 | -16.794 | 1.00 | 0.75 | O |
| ATOM | 697 | CB ASPA  |   | 219 | -2.164 | 26.399 | -14.537 | 1.00 | 0.75 | C |
| ATOM | 698 | CG ASPA  |   | 219 | -2.382 | 25.742 | -13.179 | 1.00 | 0.75 | C |
| ATOM | 699 | OD1ASP A |   | 219 | -1.367 | 25.467 | -12.502 | 1.00 | 0.75 | O |
| ATOM | 700 | OD2ASP A |   | 219 | -3.567 | 25.598 | -12.817 | 1.00 | 0.75 | O |
| ATOM | 701 | N GLYA   |   | 220 | -0.141 | 29.147 | -15.737 | 1.00 | 0.78 | N |
| ATOM | 702 | CA GLYA  |   | 220 | 0.473  | 29.702 | -16.950 | 1.00 | 0.78 | C |
| ATOM | 703 | C GLYA   |   | 220 | 1.550  | 28.753 | -17.511 | 1.00 | 0.78 | C |
| ATOM | 704 | O GLYA   |   | 220 | 2.127  | 27.966 | -16.755 | 1.00 | 0.78 | O |
| ATOM | 705 | N PROA   |   | 221 | 1.815  | 28.834 | -18.821 | 1.00 | 0.77 | N |
| ATOM | 706 | CA PROA  |   | 221 | 2.940  | 28.122 | -19.453 | 1.00 | 0.77 | C |
| ATOM | 707 | C PROA   |   | 221 | 4.249  | 28.791 | -19.013 | 1.00 | 0.77 | C |
| ATOM | 708 | O PROA   |   | 221 | 4.326  | 30.019 | -18.945 | 1.00 | 0.77 | O |
| ATOM | 709 | CB PROA  |   | 221 | 2.689  | 28.294 | -20.954 | 1.00 | 0.77 | C |
| ATOM | 710 | CG PROA  |   | 221 | 1.980  | 29.645 | -21.053 | 1.00 | 0.77 | C |
| ATOM | 711 | CD PROA  |   | 221 | 1.087  | 29.654 | -19.814 | 1.00 | 0.77 | C |
| ATOM | 712 | N CYSA   |   | 222 | 5.238  | 27.977 | -18.656 | 1.00 | 0.81 | N |
| ATOM | 713 | CA CYSA  |   | 222 | 6.554  | 28.481 | -18.215 | 1.00 | 0.81 | C |
| ATOM | 714 | C CYSA   |   | 222 | 7.150  | 29.454 | -19.243 | 1.00 | 0.81 | C |
| ATOM | 715 | O CYSA   |   | 222 | 7.416  | 29.094 | -20.390 | 1.00 | 0.81 | O |
| ATOM | 716 | CB CYSA  |   | 222 | 7.517  | 27.313 | -17.984 | 1.00 | 0.81 | C |
| ATOM | 717 | SG CYSA  |   | 222 | 9.185  | 27.853 | -17.453 | 1.00 | 0.81 | S |
| ATOM | 718 | N ARG    | A | 223 | 7.274  | 30.705 | -18.813 | 1.00 | 0.66 | N |
| ATOM | 719 | CA ARG   | A | 223 | 7.853  | 31.764 | -19.650 | 1.00 | 0.66 | C |
| ATOM | 720 | C ARG    | A | 223 | 9.374  | 31.699 | -19.489 | 1.00 | 0.66 | C |
| ATOM | 721 | O ARG    | A | 223 | 9.952  | 32.316 | -18.596 | 1.00 | 0.66 | O |
| ATOM | 722 | CB ARG   | A | 223 | 7.277  | 33.123 | -19.236 | 1.00 | 0.66 | C |
| ATOM | 723 | CG ARG   | A | 223 | 7.769  | 34.246 | -20.150 | 1.00 | 0.66 | C |
| ATOM | 724 | CD ARG   | A | 223 | 7.125  | 35.576 | -19.759 | 1.00 | 0.66 | C |
| ATOM | 725 | NE ARG   | A | 223 | 7.633  | 36.651 | -20.630 | 1.00 | 0.66 | N |
| ATOM | 726 | CZ ARG   | A | 223 | 8.785  | 37.311 | -20.489 | 1.00 | 0.66 | C |
| ATOM | 727 | NH1ARG   | A | 223 | 9.621  | 37.035 | -19.504 | 1.00 | 0.66 | N |
| ATOM | 728 | NH2ARG   | A | 223 | 9.110  | 38.289 | -21.321 | 1.00 | 0.66 | N |
| ATOM | 729 | N SERA   |   | 224 | 9.991  | 30.956 | -20.406 | 1.00 | 0.69 | N |
| ATOM | 730 | CA SERA  |   | 224 | 11.449 | 30.703 | -20.390 | 1.00 | 0.69 | C |
| ATOM | 731 | C SERA   |   | 224 | 12.290 | 31.990 | -20.348 | 1.00 | 0.69 | C |
| ATOM | 732 | O SERA   |   | 224 | 13.286 | 32.062 | -19.634 | 1.00 | 0.69 | O |
| ATOM | 733 | CB SERA  |   | 224 | 11.860 | 29.879 | -21.613 | 1.00 | 0.69 | C |

|      |     |    |       |     |        |        |         |         |      |      |   |
|------|-----|----|-------|-----|--------|--------|---------|---------|------|------|---|
| ATOM | 734 | OG | SER A | 224 | 13.268 | 29.637 | -21.582 | 1.00    | 0.69 | O    |   |
| ATOM | 735 | N  | SER A | 225 | 11.796 | 33.033 | -21.017 | 1.00    | 0.62 | N    |   |
| ATOM | 736 | CA | SER A | 225 | 12.483 | 34.342 | -21.060 | 1.00    | 0.62 | C    |   |
| ATOM | 737 | C  | SER A | 225 | 12.654 | 34.949 | -19.657 | 1.00    | 0.62 | C    |   |
| ATOM | 738 | O  | SER A | 225 | 13.735 | 35.415 | -19.300 | 1.00    | 0.62 | O    |   |
| ATOM | 739 | CB | SER A | 225 | 11.715 | 35.325 | -21.946 | 1.00    | 0.62 | C    |   |
| ATOM | 740 | OG | SER A | 225 | 12.458 | 36.541 | -22.042 | 1.00    | 0.62 | O    |   |
| ATOM | 741 | N  | ALA   | A   | 226    | 11.621 | 34.777  | -18.830 | 1.00 | 0.70 | N |
| ATOM | 742 | CA | ALA   | A   | 226    | 11.606 | 35.222  | -17.423 | 1.00 | 0.70 | C |
| ATOM | 743 | C  | ALA   | A   | 226    | 12.324 | 34.231  | -16.486 | 1.00 | 0.70 | C |
| ATOM | 744 | O  | ALA   | A   | 226    | 11.836 | 33.857  | -15.416 | 1.00 | 0.70 | O |
| ATOM | 745 | CB | ALA   | A   | 226    | 10.158 | 35.450  | -16.989 | 1.00 | 0.70 | C |
| ATOM | 746 | N  | ALA   | A   | 227    | 13.503 | 33.811  | -16.933 | 1.00 | 0.68 | N |
| ATOM | 747 | CA | ALA   | A   | 227    | 14.364 | 32.919  | -16.145 | 1.00 | 0.68 | C |
| ATOM | 748 | C  | ALA   | A   | 227    | 15.281 | 33.792  | -15.300 | 1.00 | 0.68 | C |
| ATOM | 749 | O  | ALA   | A   | 227    | 15.378 | 33.478  | -14.125 | 1.00 | 0.68 | O |
| ATOM | 750 | CB | ALA   | A   | 227    | 15.186 | 31.968  | -17.013 | 1.00 | 0.68 | C |
| ATOM | 751 | N  | ALA   | A   | 228    | 15.918 | 34.777  | -15.961 | 1.00 | 0.56 | N |
| ATOM | 752 | CA | ALA   | A   | 228    | 16.615 | 35.955  | -15.385 | 1.00 | 0.56 | C |
| ATOM | 753 | C  | ALA   | A   | 228    | 16.574 | 35.979  | -13.852 | 1.00 | 0.56 | C |
| ATOM | 754 | O  | ALA   | A   | 228    | 15.801 | 36.698  | -13.213 | 1.00 | 0.56 | O |
| ATOM | 755 | CB | ALA   | A   | 228    | 15.977 | 37.220  | -15.981 | 1.00 | 0.56 | C |
| ATOM | 756 | N  | ALA   | A   | 229    | 17.323 | 35.026  | -13.289 | 1.00 | 0.66 | N |
| ATOM | 757 | CA | ALA   | A   | 229    | 17.266 | 34.757  | -11.852 | 1.00 | 0.66 | C |
| ATOM | 758 | C  | ALA   | A   | 229    | 17.813 | 35.993  | -11.148 | 1.00 | 0.66 | C |
| ATOM | 759 | O  | ALA   | A   | 229    | 18.689 | 36.678  | -11.674 | 1.00 | 0.66 | O |
| ATOM | 760 | CB | ALA   | A   | 229    | 18.103 | 33.519  | -11.519 | 1.00 | 0.66 | C |
| ATOM | 761 | N  | ALA   | A   | 230    | 17.164 | 36.330  | -10.049 | 1.00 | 0.66 | N |
| ATOM | 762 | CA | ALA   | A   | 230    | 17.549 | 37.520  | -9.274  | 1.00 | 0.66 | C |
| ATOM | 763 | C  | ALA   | A   | 230    | 18.168 | 37.131  | -7.928  | 1.00 | 0.66 | C |
| ATOM | 764 | O  | ALA   | A   | 230    | 19.019 | 37.840  | -7.399  | 1.00 | 0.66 | O |
| ATOM | 765 | CB | ALA   | A   | 230    | 16.323 | 38.416  | -9.074  | 1.00 | 0.66 | C |
| ATOM | 766 | N  | ALA   | A   | 231    | 17.695 | 36.011  | -7.385  | 1.00 | 0.78 | N |
| ATOM | 767 | CA | ALA   | A   | 231    | 18.174 | 35.483  | -6.099  | 1.00 | 0.78 | C |
| ATOM | 768 | C  | ALA   | A   | 231    | 18.423 | 33.980  | -6.216  | 1.00 | 0.78 | C |
| ATOM | 769 | O  | ALA   | A   | 231    | 17.514 | 33.243  | -6.594  | 1.00 | 0.78 | O |
| ATOM | 770 | CB | ALA   | A   | 231    | 17.121 | 35.754  | -5.020  | 1.00 | 0.78 | C |
| ATOM | 771 | N  | SER A | 232 | 19.614 | 33.569 | -5.804  | 1.00    | 0.76 | N    |   |
| ATOM | 772 | CA | SER A | 232 | 20.048 | 32.159 | -5.852  | 1.00    | 0.76 | C    |   |
| ATOM | 773 | C  | SER A | 232 | 20.173 | 31.574 | -4.446  | 1.00    | 0.76 | C    |   |
| ATOM | 774 | O  | SER A | 232 | 20.242 | 32.286 | -3.463  | 1.00    | 0.76 | O    |   |
| ATOM | 775 | CB | SER A | 232 | 21.412 | 32.046 | -6.537  | 1.00    | 0.76 | C    |   |

|      |     |     |      |   |     |        |        |        |      |      |   |
|------|-----|-----|------|---|-----|--------|--------|--------|------|------|---|
| ATOM | 776 | OG  | SER  | A | 232 | 22.386 | 32.782 | -5.789 | 1.00 | 0.76 | O |
| ATOM | 777 | N   | ILE  | A | 233 | 20.034 | 30.269 | -4.341 | 1.00 | 0.72 | N |
| ATOM | 778 | CA  | ILE  | A | 233 | 20.232 | 29.565 | -3.061 | 1.00 | 0.72 | C |
| ATOM | 779 | C   | ILE  | A | 233 | 21.166 | 28.379 | -3.337 | 1.00 | 0.72 | C |
| ATOM | 780 | O   | ILE  | A | 233 | 21.172 | 27.851 | -4.449 | 1.00 | 0.72 | O |
| ATOM | 781 | CB  | ILE  | A | 233 | 18.885 | 29.131 | -2.449 | 1.00 | 0.72 | C |
| ATOM | 782 | CG1 | ILE  | A | 233 | 18.186 | 28.060 | -3.293 | 1.00 | 0.72 | C |
| ATOM | 783 | CG2 | ILE  | A | 233 | 17.967 | 30.345 | -2.208 | 1.00 | 0.72 | C |
| ATOM | 784 | CD1 | ILE  | A | 233 | 17.144 | 27.326 | -2.448 | 1.00 | 0.72 | C |
| ATOM | 785 | N   | ARG  | A | 234 | 21.901 | 27.944 | -2.322 | 1.00 | 0.66 | N |
| ATOM | 786 | CA  | ARG  | A | 234 | 22.830 | 26.802 | -2.478 | 1.00 | 0.66 | C |
| ATOM | 787 | C   | ARG  | A | 234 | 22.146 | 25.423 | -2.370 | 1.00 | 0.66 | C |
| ATOM | 788 | O   | ARG  | A | 234 | 22.680 | 24.418 | -2.834 | 1.00 | 0.66 | O |
| ATOM | 789 | CB  | ARG  | A | 234 | 24.089 | 26.923 | -1.596 | 1.00 | 0.66 | C |
| ATOM | 790 | CG  | ARG  | A | 234 | 23.784 | 27.134 | -0.112 | 1.00 | 0.66 | C |
| ATOM | 791 | CD  | ARG  | A | 234 | 24.913 | 26.895 | 0.900  | 1.00 | 0.66 | C |
| ATOM | 792 | NE  | ARG  | A | 234 | 24.422 | 26.917 | 2.302  | 1.00 | 0.66 | N |
| ATOM | 793 | CZ  | ARG  | A | 234 | 24.063 | 27.990 | 3.023  | 1.00 | 0.66 | C |
| ATOM | 794 | NH1 | ARG  | A | 234 | 24.117 | 29.189 | 2.498  | 1.00 | 0.66 | N |
| ATOM | 795 | NH2 | ARG  | A | 234 | 23.616 | 27.866 | 4.276  | 1.00 | 0.66 | N |
| ATOM | 796 | N   | GLYA | A | 235 | 20.989 | 25.395 | -1.695 | 1.00 | 0.80 | N |
| ATOM | 797 | CA  | GLYA | A | 235 | 20.162 | 24.181 | -1.511 | 1.00 | 0.80 | C |
| ATOM | 798 | C   | GLYA | A | 235 | 19.068 | 24.449 | -0.465 | 1.00 | 0.80 | C |
| ATOM | 799 | O   | GLYA | A | 235 | 18.684 | 25.598 | -0.236 | 1.00 | 0.80 | O |
| ATOM | 800 | N   | HIS  | A | 236 | 18.807 | 23.429 | 0.346  | 1.00 | 0.76 | N |
| ATOM | 801 | CA  | HIS  | A | 236 | 17.771 | 23.479 | 1.395  | 1.00 | 0.76 | C |
| ATOM | 802 | C   | HIS  | A | 236 | 17.900 | 22.272 | 2.328  | 1.00 | 0.76 | C |
| ATOM | 803 | O   | HIS  | A | 236 | 18.384 | 21.213 | 1.933  | 1.00 | 0.76 | O |
| ATOM | 804 | CB  | HIS  | A | 236 | 16.372 | 23.503 | 0.762  | 1.00 | 0.76 | C |
| ATOM | 805 | CG  | HIS  | A | 236 | 16.091 | 22.267 | -0.097 | 1.00 | 0.76 | C |
| ATOM | 806 | ND1 | HIS  | A | 236 | 15.467 | 21.172 | 0.324  | 1.00 | 0.76 | N |
| ATOM | 807 | CD2 | HIS  | A | 236 | 16.536 | 22.050 | -1.331 | 1.00 | 0.76 | C |
| ATOM | 808 | CE1 | HIS  | A | 236 | 15.525 | 20.266 | -0.641 | 1.00 | 0.76 | C |
| ATOM | 809 | NE2 | HIS  | A | 236 | 16.190 | 20.813 | -1.648 | 1.00 | 0.76 | N |
| ATOM | 810 | N   | GLU  | A | 237 | 17.475 | 22.489 | 3.564  | 1.00 | 0.77 | N |
| ATOM | 811 | CA  | GLU  | A | 237 | 17.490 | 21.456 | 4.610  | 1.00 | 0.77 | C |
| ATOM | 812 | C   | GLU  | A | 237 | 16.164 | 21.475 | 5.381  | 1.00 | 0.77 | C |
| ATOM | 813 | O   | GLU  | A | 237 | 15.481 | 22.500 | 5.433  | 1.00 | 0.77 | O |
| ATOM | 814 | CB  | GLU  | A | 237 | 18.690 | 21.696 | 5.540  | 1.00 | 0.77 | C |
| ATOM | 815 | CG  | GLU  | A | 237 | 18.867 | 20.606 | 6.608  | 1.00 | 0.77 | C |
| ATOM | 816 | CD  | GLU  | A | 237 | 19.109 | 19.221 | 5.995  | 1.00 | 0.77 | C |
| ATOM | 817 | OE1 | GLU  | A | 237 | 18.116 | 18.623 | 5.517  | 1.00 | 0.77 | O |

|      |     |     |     |   |     |        |        |        |      |      |   |
|------|-----|-----|-----|---|-----|--------|--------|--------|------|------|---|
| ATOM | 818 | OE2 | GLU | A | 237 | 20.284 | 18.805 | 6.003  | 1.00 | 0.77 | O |
| ATOM | 819 | N   | ASP | A | 238 | 15.833 | 20.330 | 5.967  | 1.00 | 0.79 | N |
| ATOM | 820 | CA  | ASP | A | 238 | 14.631 | 20.191 | 6.803  | 1.00 | 0.79 | C |
| ATOM | 821 | C   | ASP | A | 238 | 15.022 | 20.278 | 8.284  | 1.00 | 0.79 | C |
| ATOM | 822 | O   | ASP | A | 238 | 16.067 | 19.784 | 8.710  | 1.00 | 0.79 | O |
| ATOM | 823 | CB  | ASP | A | 238 | 13.969 | 18.841 | 6.480  | 1.00 | 0.79 | C |
| ATOM | 824 | CG  | ASP | A | 238 | 12.581 | 18.619 | 7.100  | 1.00 | 0.79 | C |
| ATOM | 825 | OD1 | ASP | A | 238 | 12.315 | 19.153 | 8.179  | 1.00 | 0.79 | O |
| ATOM | 826 | OD2 | ASP | A | 238 | 11.783 | 17.885 | 6.485  | 1.00 | 0.79 | O |
| ATOM | 827 | N   | VAL | A | 239 | 14.142 | 20.924 | 9.039  | 1.00 | 0.80 | N |
| ATOM | 828 | CA  | VAL | A | 239 | 14.193 | 20.930 | 10.511 | 1.00 | 0.80 | C |
| ATOM | 829 | C   | VAL | A | 239 | 13.797 | 19.523 | 11.024 | 1.00 | 0.80 | C |
| ATOM | 830 | O   | VAL | A | 239 | 12.809 | 18.948 | 10.573 | 1.00 | 0.80 | O |
| ATOM | 831 | CB  | VAL | A | 239 | 13.229 | 22.000 | 11.059 | 1.00 | 0.80 | C |
| ATOM | 832 | CG1 | VAL | A | 239 | 13.245 | 22.102 | 12.587 | 1.00 | 0.80 | C |
| ATOM | 833 | CG2 | VAL | A | 239 | 13.509 | 23.383 | 10.464 | 1.00 | 0.80 | C |
| ATOM | 834 | N   | PRO | A | 240 | 14.491 | 19.007 | 12.043 | 1.00 | 0.77 | N |
| ATOM | 835 | CA  | PRO | A | 240 | 14.131 | 17.728 | 12.688 | 1.00 | 0.77 | C |
| ATOM | 836 | C   | PRO | A | 240 | 12.636 | 17.754 | 13.035 | 1.00 | 0.77 | C |
| ATOM | 837 | O   | PRO | A | 240 | 12.130 | 18.752 | 13.553 | 1.00 | 0.77 | O |
| ATOM | 838 | CB  | PRO | A | 240 | 14.981 | 17.709 | 13.956 | 1.00 | 0.77 | C |
| ATOM | 839 | CG  | PRO | A | 240 | 16.242 | 18.463 | 13.540 | 1.00 | 0.77 | C |
| ATOM | 840 | CD  | PRO | A | 240 | 15.721 | 19.571 | 12.629 | 1.00 | 0.77 | C |
| ATOM | 841 | N   | ARG | A | 241 | 11.937 | 16.716 | 12.587 | 1.00 | 0.68 | N |
| ATOM | 842 | CA  | ARG | A | 241 | 10.469 | 16.657 | 12.704 | 1.00 | 0.68 | C |
| ATOM | 843 | C   | ARG | A | 241 | 10.048 | 16.636 | 14.178 | 1.00 | 0.68 | C |
| ATOM | 844 | O   | ARG | A | 241 | 10.748 | 16.092 | 15.033 | 1.00 | 0.68 | O |
| ATOM | 845 | CB  | ARG | A | 241 | 9.941  | 15.411 | 11.988 | 1.00 | 0.68 | C |
| ATOM | 846 | CG  | ARG | A | 241 | 8.412  | 15.326 | 12.046 | 1.00 | 0.68 | C |
| ATOM | 847 | CD  | ARG | A | 241 | 7.881  | 14.055 | 11.393 | 1.00 | 0.68 | C |
| ATOM | 848 | NE  | ARG | A | 241 | 8.061  | 14.159 | 9.937  | 1.00 | 0.68 | N |
| ATOM | 849 | CZ  | ARG | A | 241 | 7.250  | 14.779 | 9.078  | 1.00 | 0.68 | C |
| ATOM | 850 | NH1 | ARG | A | 241 | 6.127  | 15.355 | 9.479  | 1.00 | 0.68 | N |
| ATOM | 851 | NH2 | ARG | A | 241 | 7.577  | 14.867 | 7.800  | 1.00 | 0.68 | N |
| ATOM | 852 | N   | ASN | A | 242 | 8.895  | 17.246 | 14.430 | 1.00 | 0.72 | N |
| ATOM | 853 | CA  | ASN | A | 242 | 8.234  | 17.188 | 15.751 | 1.00 | 0.72 | C |
| ATOM | 854 | C   | ASN | A | 242 | 9.131  | 17.665 | 16.897 | 1.00 | 0.72 | C |
| ATOM | 855 | O   | ASN | A | 242 | 9.254  | 17.029 | 17.946 | 1.00 | 0.72 | O |
| ATOM | 856 | CB  | ASN | A | 242 | 7.726  | 15.766 | 16.049 | 1.00 | 0.72 | C |
| ATOM | 857 | CG  | ASN | A | 242 | 6.718  | 15.342 | 14.996 | 1.00 | 0.72 | C |
| ATOM | 858 | OD1 | ASN | A | 242 | 6.099  | 16.180 | 14.395 | 1.00 | 0.72 | O |
| ATOM | 859 | ND2 | ASN | A | 242 | 6.627  | 14.047 | 14.748 | 1.00 | 0.72 | N |

|      |     |     |      |   |     |        |        |        |      |      |   |
|------|-----|-----|------|---|-----|--------|--------|--------|------|------|---|
| ATOM | 860 | N   | ASN  | A | 243 | 9.827  | 18.761 | 16.630 | 1.00 | 0.75 | N |
| ATOM | 861 | CA  | ASN  | A | 243 | 10.780 | 19.320 | 17.595 | 1.00 | 0.75 | C |
| ATOM | 862 | C   | ASN  | A | 243 | 10.737 | 20.846 | 17.513 | 1.00 | 0.75 | C |
| ATOM | 863 | O   | ASN  | A | 243 | 11.527 | 21.487 | 16.816 | 1.00 | 0.75 | O |
| ATOM | 864 | CB  | ASN  | A | 243 | 12.182 | 18.767 | 17.305 | 1.00 | 0.75 | C |
| ATOM | 865 | CG  | ASN  | A | 243 | 13.185 | 19.176 | 18.385 | 1.00 | 0.75 | C |
| ATOM | 866 | OD1 | ASN  | A | 243 | 13.023 | 20.147 | 19.118 | 1.00 | 0.75 | O |
| ATOM | 867 | ND2 | ASN  | A | 243 | 14.269 | 18.441 | 18.461 | 1.00 | 0.75 | N |
| ATOM | 868 | N   | GLU  | A | 244 | 9.847  | 21.421 | 18.313 | 1.00 | 0.76 | N |
| ATOM | 869 | CA  | GLU  | A | 244 | 9.672  | 22.886 | 18.339 | 1.00 | 0.76 | C |
| ATOM | 870 | C   | GLU  | A | 244 | 10.907 | 23.654 | 18.829 | 1.00 | 0.76 | C |
| ATOM | 871 | O   | GLU  | A | 244 | 11.116 | 24.790 | 18.416 | 1.00 | 0.76 | O |
| ATOM | 872 | CB  | GLU  | A | 244 | 8.433  | 23.308 | 19.128 | 1.00 | 0.76 | C |
| ATOM | 873 | CG  | GLU  | A | 244 | 7.163  | 22.949 | 18.354 | 1.00 | 0.76 | C |
| ATOM | 874 | CD  | GLU  | A | 244 | 5.934  | 23.598 | 18.990 | 1.00 | 0.76 | C |
| ATOM | 875 | OE1 | GLU  | A | 244 | 5.731  | 24.804 | 18.728 | 1.00 | 0.76 | O |
| ATOM | 876 | OE2 | GLU  | A | 244 | 5.243  | 22.921 | 19.782 | 1.00 | 0.76 | O |
| ATOM | 877 | N   | ALA  | A | 245 | 11.735 | 23.000 | 19.645 | 1.00 | 0.85 | N |
| ATOM | 878 | CA  | ALA  | A | 245 | 13.027 | 23.561 | 20.091 | 1.00 | 0.85 | C |
| ATOM | 879 | C   | ALA  | A | 245 | 14.013 | 23.710 | 18.919 | 1.00 | 0.85 | C |
| ATOM | 880 | O   | ALA  | A | 245 | 14.587 | 24.778 | 18.714 | 1.00 | 0.85 | O |
| ATOM | 881 | CB  | ALA  | A | 245 | 13.637 | 22.667 | 21.173 | 1.00 | 0.85 | C |
| ATOM | 882 | N   | ALA  | A | 246 | 14.039 | 22.692 | 18.058 | 1.00 | 0.88 | N |
| ATOM | 883 | CA  | ALA  | A | 246 | 14.855 | 22.696 | 16.827 | 1.00 | 0.88 | C |
| ATOM | 884 | C   | ALA  | A | 246 | 14.317 | 23.721 | 15.822 | 1.00 | 0.88 | C |
| ATOM | 885 | O   | ALA  | A | 246 | 15.068 | 24.498 | 15.232 | 1.00 | 0.88 | O |
| ATOM | 886 | CB  | ALA  | A | 246 | 14.853 | 21.310 | 16.183 | 1.00 | 0.88 | C |
| ATOM | 887 | N   | LEUA |   | 247 | 12.991 | 23.818 | 15.791 | 1.00 | 0.86 | N |
| ATOM | 888 | CA  | LEUA |   | 247 | 12.297 | 24.793 | 14.945 | 1.00 | 0.86 | C |
| ATOM | 889 | C   | LEUA |   | 247 | 12.555 | 26.237 | 15.392 | 1.00 | 0.86 | C |
| ATOM | 890 | O   | LEUA |   | 247 | 12.801 | 27.107 | 14.561 | 1.00 | 0.86 | O |
| ATOM | 891 | CB  | LEUA |   | 247 | 10.807 | 24.479 | 14.951 | 1.00 | 0.86 | C |
| ATOM | 892 | CG  | LEUA |   | 247 | 10.042 | 25.410 | 14.018 | 1.00 | 0.86 | C |
| ATOM | 893 | CD1 | LEUA |   | 247 | 10.488 | 25.314 | 12.557 | 1.00 | 0.86 | C |
| ATOM | 894 | CD2 | LEUA |   | 247 | 8.595  | 25.003 | 14.148 | 1.00 | 0.86 | C |
| ATOM | 895 | N   | ALA  | A | 248 | 12.650 | 26.420 | 16.705 | 1.00 | 0.89 | N |
| ATOM | 896 | CA  | ALA  | A | 248 | 12.929 | 27.729 | 17.324 | 1.00 | 0.89 | C |
| ATOM | 897 | C   | ALA  | A | 248 | 14.330 | 28.229 | 16.959 | 1.00 | 0.89 | C |
| ATOM | 898 | O   | ALA  | A | 248 | 14.477 | 29.347 | 16.470 | 1.00 | 0.89 | O |
| ATOM | 899 | CB  | ALA  | A | 248 | 12.782 | 27.629 | 18.843 | 1.00 | 0.89 | C |
| ATOM | 900 | N   | ALA  | A | 249 | 15.283 | 27.297 | 16.986 | 1.00 | 0.87 | N |
| ATOM | 901 | CA  | ALA  | A | 249 | 16.683 | 27.574 | 16.615 | 1.00 | 0.87 | C |



|      |     |     |       |     |        |        |        |        |      |      |   |
|------|-----|-----|-------|-----|--------|--------|--------|--------|------|------|---|
| ATOM | 902 | C   | ALA   | A   | 249    | 16.815 | 27.938 | 15.128 | 1.00 | 0.87 | C |
| ATOM | 903 | O   | ALA   | A   | 249    | 17.525 | 28.877 | 14.772 | 1.00 | 0.87 | O |
| ATOM | 904 | CB  | ALA   | A   | 249    | 17.546 | 26.351 | 16.933 | 1.00 | 0.87 | C |
| ATOM | 905 | N   | ALA   | A   | 250    | 16.004 | 27.277 | 14.301 | 1.00 | 0.90 | N |
| ATOM | 906 | CA  | ALA   | A   | 250    | 15.969 | 27.506 | 12.844 | 1.00 | 0.90 | C |
| ATOM | 907 | C   | ALA   | A   | 250    | 15.366 | 28.874 | 12.485 | 1.00 | 0.90 | C |
| ATOM | 908 | O   | ALA   | A   | 250    | 15.957 | 29.638 | 11.722 | 1.00 | 0.90 | O |
| ATOM | 909 | CB  | ALA   | A   | 250    | 15.173 | 26.386 | 12.173 | 1.00 | 0.90 | C |
| ATOM | 910 | N   | VALA  | 251 | 14.277 | 29.218 | 13.176 | 1.00   | 0.90 | N    |   |
| ATOM | 911 | CA  | VALA  | 251 | 13.557 | 30.495 | 12.976 | 1.00   | 0.90 | C    |   |
| ATOM | 912 | C   | VALA  | 251 | 14.401 | 31.689 | 13.448 | 1.00   | 0.90 | C    |   |
| ATOM | 913 | O   | VALA  | 251 | 14.337 | 32.764 | 12.852 | 1.00   | 0.90 | O    |   |
| ATOM | 914 | CB  | VALA  | 251 | 12.179 | 30.482 | 13.670 | 1.00   | 0.90 | C    |   |
| ATOM | 915 | CG1 | VALA  | 251 | 11.425 | 31.808 | 13.503 | 1.00   | 0.90 | C    |   |
| ATOM | 916 | CG2 | VALA  | 251 | 11.283 | 29.390 | 13.084 | 1.00   | 0.90 | C    |   |
| ATOM | 917 | N   | ALA   | A   | 252    | 15.202 | 31.464 | 14.488 | 1.00 | 0.87 | N |
| ATOM | 918 | CA  | ALA   | A   | 252    | 16.092 | 32.500 | 15.047 | 1.00 | 0.87 | C |
| ATOM | 919 | C   | ALA   | A   | 252    | 17.077 | 33.024 | 13.993 | 1.00 | 0.87 | C |
| ATOM | 920 | O   | ALA   | A   | 252    | 17.454 | 34.193 | 14.020 | 1.00 | 0.87 | O |
| ATOM | 921 | CB  | ALA   | A   | 252    | 16.865 | 31.930 | 16.237 | 1.00 | 0.87 | C |
| ATOM | 922 | N   | HIS A | 253 | 17.399 | 32.157 | 13.035 | 1.00   | 0.81 | N    |   |
| ATOM | 923 | CA  | HIS A | 253 | 18.327 | 32.478 | 11.942 | 1.00   | 0.81 | C    |   |
| ATOM | 924 | C   | HIS A | 253 | 17.636 | 33.144 | 10.741 | 1.00   | 0.81 | C    |   |
| ATOM | 925 | O   | HIS A | 253 | 18.250 | 33.958 | 10.056 | 1.00   | 0.81 | O    |   |
| ATOM | 926 | CB  | HIS A | 253 | 19.034 | 31.190 | 11.507 | 1.00   | 0.81 | C    |   |
| ATOM | 927 | CG  | HIS A | 253 | 20.026 | 31.453 | 10.372 | 1.00   | 0.81 | C    |   |
| ATOM | 928 | ND1 | HIS A | 253 | 19.714 | 31.543 | 9.082  | 1.00   | 0.81 | N    |   |
| ATOM | 929 | CD2 | HIS A | 253 | 21.335 | 31.649 | 10.493 | 1.00   | 0.81 | C    |   |
| ATOM | 930 | CE1 | HIS A | 253 | 20.827 | 31.790 | 8.402  | 1.00   | 0.81 | C    |   |
| ATOM | 931 | NE2 | HIS A | 253 | 21.830 | 31.842 | 9.275  | 1.00   | 0.81 | N    |   |
| ATOM | 932 | N   | GLN   | A   | 254    | 16.417 | 32.705 | 10.438 | 1.00 | 0.80 | N |
| ATOM | 933 | CA  | GLN   | A   | 254    | 15.728 | 33.060 | 9.185  | 1.00 | 0.80 | C |
| ATOM | 934 | C   | GLN   | A   | 254    | 14.259 | 32.605 | 9.227  | 1.00 | 0.80 | C |
| ATOM | 935 | O   | GLN   | A   | 254    | 13.930 | 31.694 | 9.995  | 1.00 | 0.80 | O |
| ATOM | 936 | CB  | GLN   | A   | 254    | 16.443 | 32.381 | 8.002  | 1.00 | 0.80 | C |
| ATOM | 937 | CG  | GLN   | A   | 254    | 16.331 | 30.858 | 8.096  | 1.00 | 0.80 | C |
| ATOM | 938 | CD  | GLN   | A   | 254    | 17.194 | 30.146 | 7.074  | 1.00 | 0.80 | C |
| ATOM | 939 | OE1 | GLN   | A   | 254    | 17.042 | 30.264 | 5.870  | 1.00 | 0.80 | O |
| ATOM | 940 | NE2 | GLN   | A   | 254    | 18.105 | 29.359 | 7.601  | 1.00 | 0.80 | N |
| ATOM | 941 | N   | PROA  | 255 | 13.413 | 33.191 | 8.369  | 1.00   | 0.91 | N    |   |
| ATOM | 942 | CA  | PROA  | 255 | 12.043 | 32.697 | 8.140  | 1.00   | 0.91 | C    |   |
| ATOM | 943 | C   | PROA  | 255 | 12.111 | 31.244 | 7.650  | 1.00   | 0.91 | C    |   |

|      |     |     |       |     |        |        |        |        |      |      |   |
|------|-----|-----|-------|-----|--------|--------|--------|--------|------|------|---|
| ATOM | 944 | O   | PROA  | 255 | 12.991 | 30.878 | 6.871  | 1.00   | 0.91 | O    |   |
| ATOM | 945 | CB  | PROA  | 255 | 11.496 | 33.597 | 7.032  | 1.00   | 0.91 | C    |   |
| ATOM | 946 | CG  | PROA  | 255 | 12.240 | 34.913 | 7.245  | 1.00   | 0.91 | C    |   |
| ATOM | 947 | CD  | PROA  | 255 | 13.640 | 34.462 | 7.654  | 1.00   | 0.91 | C    |   |
| ATOM | 948 | N   | VALA  | 256 | 11.199 | 30.427 | 8.158  | 1.00   | 0.87 | N    |   |
| ATOM | 949 | CA  | VALA  | 256 | 11.160 | 28.986 | 7.828  | 1.00   | 0.87 | C    |   |
| ATOM | 950 | C   | VALA  | 256 | 9.809  | 28.641 | 7.186  | 1.00   | 0.87 | C    |   |
| ATOM | 951 | O   | VALA  | 256 | 8.754  | 28.958 | 7.738  | 1.00   | 0.87 | O    |   |
| ATOM | 952 | CB  | VALA  | 256 | 11.424 | 28.140 | 9.095  | 1.00   | 0.87 | C    |   |
| ATOM | 953 | CG1 | VALA  | 256 | 11.356 | 26.631 | 8.830  | 1.00   | 0.87 | C    |   |
| ATOM | 954 | CG2 | VALA  | 256 | 12.804 | 28.444 | 9.688  | 1.00   | 0.87 | C    |   |
| ATOM | 955 | N   | SER A | 257 | 9.888  | 27.842 | 6.127  | 1.00   | 0.88 | N    |   |
| ATOM | 956 | CA  | SER A | 257 | 8.698  | 27.285 | 5.455  | 1.00   | 0.88 | C    |   |
| ATOM | 957 | C   | SER A | 257 | 8.169  | 26.097 | 6.254  | 1.00   | 0.88 | C    |   |
| ATOM | 958 | O   | SER A | 257 | 8.930  | 25.229 | 6.684  | 1.00   | 0.88 | O    |   |
| ATOM | 959 | CB  | SER A | 257 | 9.036  | 26.785 | 4.052  | 1.00   | 0.88 | C    |   |
| ATOM | 960 | OG  | SER A | 257 | 9.443  | 27.889 | 3.245  | 1.00   | 0.88 | O    |   |
| ATOM | 961 | N   | VALA  | 258 | 6.867  | 26.121 | 6.492  | 1.00   | 0.85 | N    |   |
| ATOM | 962 | CA  | VALA  | 258 | 6.193  | 25.062 | 7.265  | 1.00   | 0.85 | C    |   |
| ATOM | 963 | C   | VALA  | 258 | 4.862  | 24.673 | 6.597  | 1.00   | 0.85 | C    |   |
| ATOM | 964 | O   | VALA  | 258 | 4.237  | 25.468 | 5.889  | 1.00   | 0.85 | O    |   |
| ATOM | 965 | CB  | VALA  | 258 | 5.972  | 25.492 | 8.731  | 1.00   | 0.85 | C    |   |
| ATOM | 966 | CG1 | VALA  | 258 | 7.259  | 25.864 | 9.477  | 1.00   | 0.85 | C    |   |
| ATOM | 967 | CG2 | VALA  | 258 | 5.011  | 26.671 | 8.797  | 1.00   | 0.85 | C    |   |
| ATOM | 968 | N   | ALA   | A   | 259    | 4.405  | 23.482 | 6.949  | 1.00 | 0.90 | N |
| ATOM | 969 | CA  | ALA   | A   | 259    | 3.092  | 22.973 | 6.525  | 1.00 | 0.90 | C |
| ATOM | 970 | C   | ALA   | A   | 259    | 2.216  | 22.779 | 7.764  | 1.00 | 0.90 | C |
| ATOM | 971 | O   | ALA   | A   | 259    | 2.698  | 22.395 | 8.830  | 1.00 | 0.90 | O |
| ATOM | 972 | CB  | ALA   | A   | 259    | 3.272  | 21.641 | 5.798  | 1.00 | 0.90 | C |
| ATOM | 973 | N   | ILE A | 260 | 0.954  | 23.148 | 7.608  | 1.00   | 0.82 | N    |   |
| ATOM | 974 | CA  | ILE A | 260 | -0.040 | 23.068 | 8.691  | 1.00   | 0.82 | C    |   |
| ATOM | 975 | C   | ILE A | 260 | -1.359 | 22.483 | 8.172  | 1.00   | 0.82 | C    |   |
| ATOM | 976 | O   | ILE A | 260 | -1.591 | 22.362 | 6.964  | 1.00   | 0.82 | O    |   |
| ATOM | 977 | CB  | ILE A | 260 | -0.275 | 24.448 | 9.337  | 1.00   | 0.82 | C    |   |
| ATOM | 978 | CG1 | ILE A | 260 | -0.825 | 25.447 | 8.310  | 1.00   | 0.82 | C    |   |
| ATOM | 979 | CG2 | ILE A | 260 | 0.997  | 24.948 | 10.038 | 1.00   | 0.82 | C    |   |
| ATOM | 980 | CD1 | ILE A | 260 | -1.509 | 26.644 | 8.972  | 1.00   | 0.82 | C    |   |
| ATOM | 981 | N   | ASN   | A   | 261    | -2.228 | 22.202 | 9.127  | 1.00 | 0.84 | N |
| ATOM | 982 | CA  | ASN   | A   | 261    | -3.607 | 21.797 | 8.854  | 1.00 | 0.84 | C |
| ATOM | 983 | C   | ASN   | A   | 261    | -4.483 | 23.042 | 9.039  | 1.00 | 0.84 | C |
| ATOM | 984 | O   | ASN   | A   | 261    | -4.803 | 23.437 | 10.162 | 1.00 | 0.84 | O |
| ATOM | 985 | CB  | ASN   | A   | 261    | -3.998 | 20.693 | 9.838  | 1.00 | 0.84 | C |

|      |      |     |      |     |         |         |        |        |      |      |   |
|------|------|-----|------|-----|---------|---------|--------|--------|------|------|---|
| ATOM | 986  | CG  | ASN  | A   | 261     | -5.361  | 20.107 | 9.475  | 1.00 | 0.84 | C |
| ATOM | 987  | OD1 | ASN  | A   | 261     | -6.182  | 20.734 | 8.831  | 1.00 | 0.84 | O |
| ATOM | 988  | ND2 | ASN  | A   | 261     | -5.620  | 18.908 | 9.943  | 1.00 | 0.84 | N |
| ATOM | 989  | N   | GLYA | 262 | -4.816  | 23.658  | 7.901  | 1.00   | 0.84 | N    |   |
| ATOM | 990  | CA  | GLYA | 262 | -5.630  | 24.888  | 7.892  | 1.00   | 0.84 | C    |   |
| ATOM | 991  | C   | GLYA | 262 | -7.017  | 24.638  | 7.290  | 1.00   | 0.84 | C    |   |
| ATOM | 992  | O   | GLYA | 262 | -7.690  | 25.569  | 6.859  | 1.00   | 0.84 | O    |   |
| ATOM | 993  | N   | GLU  | A   | 263     | -7.465  | 23.385 | 7.385  | 1.00 | 0.72 | N |
| ATOM | 994  | CA  | GLU  | A   | 263     | -8.776  | 22.977 | 6.841  | 1.00 | 0.72 | C |
| ATOM | 995  | C   | GLU  | A   | 263     | -9.953  | 23.237 | 7.789  | 1.00 | 0.72 | C |
| ATOM | 996  | O   | GLU  | A   | 263     | -11.087 | 22.906 | 7.467  | 1.00 | 0.72 | O |
| ATOM | 997  | CB  | GLU  | A   | 263     | -8.801  | 21.507 | 6.414  | 1.00 | 0.72 | C |
| ATOM | 998  | CG  | GLU  | A   | 263     | -8.689  | 20.515 | 7.578  | 1.00 | 0.72 | C |
| ATOM | 999  | CD  | GLU  | A   | 263     | -8.507  | 19.063 | 7.132  | 1.00 | 0.72 | C |
| ATOM | 1000 | OE1 | GLU  | A   | 263     | -9.089  | 18.718 | 6.085  | 1.00 | 0.72 | O |
| ATOM | 1001 | OE2 | GLU  | A   | 263     | -7.822  | 18.318 | 7.873  | 1.00 | 0.72 | O |
| ATOM | 1002 | N   | ASPA | 264 | -9.646  | 23.581  | 9.032  | 1.00   | 0.73 | N    |   |
| ATOM | 1003 | CA  | ASPA | 264 | -10.712 | 23.799  | 10.022 | 1.00   | 0.73 | C    |   |
| ATOM | 1004 | C   | ASPA | 264 | -11.210 | 25.251  | 10.057 | 1.00   | 0.73 | C    |   |
| ATOM | 1005 | O   | ASPA | 264 | -10.489 | 26.191  | 9.723  | 1.00   | 0.73 | O    |   |
| ATOM | 1006 | CB  | ASPA | 264 | -10.250 | 23.355  | 11.406 | 1.00   | 0.73 | C    |   |
| ATOM | 1007 | CG  | ASPA | 264 | -9.066  | 24.171  | 11.890 | 1.00   | 0.73 | C    |   |
| ATOM | 1008 | OD1 | ASPA | 264 | -8.944  | 25.366  | 11.579 | 1.00   | 0.73 | O    |   |
| ATOM | 1009 | OD2 | ASPA | 264 | -8.251  | 23.527  | 12.511 | 1.00   | 0.73 | O    |   |
| ATOM | 1010 | N   | MET  | A   | 265     | -12.370 | 25.385 | 10.682 | 1.00 | 0.69 | N |
| ATOM | 1011 | CA  | MET  | A   | 265     | -13.035 | 26.685 | 10.884 | 1.00 | 0.69 | C |
| ATOM | 1012 | C   | MET  | A   | 265     | -12.325 | 27.653 | 11.844 | 1.00 | 0.69 | C |
| ATOM | 1013 | O   | MET  | A   | 265     | -12.183 | 28.844 | 11.590 | 1.00 | 0.69 | O |
| ATOM | 1014 | CB  | MET  | A   | 265     | -14.496 | 26.497 | 11.286 | 1.00 | 0.69 | C |
| ATOM | 1015 | CG  | MET  | A   | 265     | -14.609 | 25.792 | 12.640 | 1.00 | 0.69 | C |
| ATOM | 1016 | SD  | MET  | A   | 265     | -16.327 | 25.555 | 13.201 | 1.00 | 0.69 | S |
| ATOM | 1017 | CE  | MET  | A   | 265     | -16.843 | 24.348 | 11.999 | 1.00 | 0.69 | C |
| ATOM | 1018 | N   | ALA  | A   | 266     | -11.800 | 27.094 | 12.926 | 1.00 | 0.78 | N |
| ATOM | 1019 | CA  | ALA  | A   | 266     | -11.118 | 27.897 | 13.954 | 1.00 | 0.78 | C |
| ATOM | 1020 | C   | ALA  | A   | 266     | -9.918  | 28.661 | 13.379 | 1.00 | 0.78 | C |
| ATOM | 1021 | O   | ALA  | A   | 266     | -9.828  | 29.877 | 13.523 | 1.00 | 0.78 | O |
| ATOM | 1022 | CB  | ALA  | A   | 266     | -10.677 | 26.981 | 15.091 | 1.00 | 0.78 | C |
| ATOM | 1023 | N   | PHEA | 267 | -9.131  | 27.962  | 12.560 | 1.00   | 0.75 | N    |   |
| ATOM | 1024 | CA  | PHEA | 267 | -7.967  | 28.563  | 11.890 | 1.00   | 0.75 | C    |   |
| ATOM | 1025 | C   | PHEA | 267 | -8.411  | 29.527  | 10.783 | 1.00   | 0.75 | C    |   |
| ATOM | 1026 | O   | PHEA | 267 | -7.904  | 30.639  | 10.699 | 1.00   | 0.75 | O    |   |
| ATOM | 1027 | CB  | PHEA | 267 | -7.063  | 27.478  | 11.299 | 1.00   | 0.75 | C    |   |

|      |      |     |      |     |         |         |        |        |      |      |   |
|------|------|-----|------|-----|---------|---------|--------|--------|------|------|---|
| ATOM | 1028 | CG  | PHEA | 267 | -5.825  | 28.053  | 10.624 | 1.00   | 0.75 | C    |   |
| ATOM | 1029 | CD1 | PHEA | 267 | -5.887  | 28.480  | 9.304  | 1.00   | 0.75 | C    |   |
| ATOM | 1030 | CD2 | PHEA | 267 | -4.677  | 28.227  | 11.379 | 1.00   | 0.75 | C    |   |
| ATOM | 1031 | CE1 | PHEA | 267 | -4.788  | 29.107  | 8.738  | 1.00   | 0.75 | C    |   |
| ATOM | 1032 | CE2 | PHEA | 267 | -3.578  | 28.854  | 10.811 | 1.00   | 0.75 | C    |   |
| ATOM | 1033 | CZ  | PHEA | 267 | -3.636  | 29.296  | 9.494  | 1.00   | 0.75 | C    |   |
| ATOM | 1034 | N   | ARG  | A   | 268     | -9.396  | 29.106 | 9.995  | 1.00 | 0.68 | N |
| ATOM | 1035 | CA  | ARG  | A   | 268     | -9.847  | 29.902 | 8.836  | 1.00 | 0.68 | C |
| ATOM | 1036 | C   | ARG  | A   | 268     | -10.483 | 31.253 | 9.208  | 1.00 | 0.68 | C |
| ATOM | 1037 | O   | ARG  | A   | 268     | -10.300 | 32.218 | 8.474  | 1.00 | 0.68 | O |
| ATOM | 1038 | CB  | ARG  | A   | 268     | -10.771 | 29.096 | 7.924  | 1.00 | 0.68 | C |
| ATOM | 1039 | CG  | ARG  | A   | 268     | -12.062 | 28.774 | 8.653  | 1.00 | 0.68 | C |
| ATOM | 1040 | CD  | ARG  | A   | 268     | -13.101 | 28.051 | 7.828  | 1.00 | 0.68 | C |
| ATOM | 1041 | NE  | ARG  | A   | 268     | -12.630 | 26.713 | 7.493  | 1.00 | 0.68 | N |
| ATOM | 1042 | CZ  | ARG  | A   | 268     | -13.291 | 25.905 | 6.678  | 1.00 | 0.68 | C |
| ATOM | 1043 | NH1 | ARG  | A   | 268     | -14.469 | 26.247 | 6.168  | 1.00 | 0.68 | N |
| ATOM | 1044 | NH2 | ARG  | A   | 268     | -12.729 | 24.784 | 6.284  | 1.00 | 0.68 | N |
| ATOM | 1045 | N   | PHEA | 269 | -11.119 | 31.323  | 10.379 | 1.00   | 0.66 | N    |   |
| ATOM | 1046 | CA  | PHEA | 269 | -11.782 | 32.559  | 10.838 | 1.00   | 0.66 | C    |   |
| ATOM | 1047 | C   | PHEA | 269 | -11.013 | 33.281  | 11.951 | 1.00   | 0.66 | C    |   |
| ATOM | 1048 | O   | PHEA | 269 | -11.525 | 34.214  | 12.574 | 1.00   | 0.66 | O    |   |
| ATOM | 1049 | CB  | PHEA | 269 | -13.210 | 32.263  | 11.313 | 1.00   | 0.66 | C    |   |
| ATOM | 1050 | CG  | PHEA | 269 | -14.150 | 31.902  | 10.163 | 1.00   | 0.66 | C    |   |
| ATOM | 1051 | CD1 | PHEA | 269 | -14.793 | 32.889  | 9.429  | 1.00   | 0.66 | C    |   |
| ATOM | 1052 | CD2 | PHEA | 269 | -14.371 | 30.573  | 9.852  | 1.00   | 0.66 | C    |   |
| ATOM | 1053 | CE1 | PHEA | 269 | -15.635 | 32.539  | 8.379  | 1.00   | 0.66 | C    |   |
| ATOM | 1054 | CE2 | PHEA | 269 | -15.210 | 30.222  | 8.804  | 1.00   | 0.66 | C    |   |
| ATOM | 1055 | CZ  | PHEA | 269 | -15.837 | 31.203  | 8.056  | 1.00   | 0.66 | C    |   |
| ATOM | 1056 | N   | TYR  | A   | 270     | -9.754  | 32.885 | 12.149 | 1.00 | 0.77 | N |
| ATOM | 1057 | CA  | TYR  | A   | 270     | -8.851  | 33.590 | 13.072 | 1.00 | 0.77 | C |
| ATOM | 1058 | C   | TYR  | A   | 270     | -8.795  | 35.073 | 12.675 | 1.00 | 0.77 | C |
| ATOM | 1059 | O   | TYR  | A   | 270     | -8.621  | 35.412 | 11.506 | 1.00 | 0.77 | O |
| ATOM | 1060 | CB  | TYR  | A   | 270     | -7.455  | 32.963 | 12.995 | 1.00 | 0.77 | C |
| ATOM | 1061 | CG  | TYR  | A   | 270     | -6.402  | 33.830 | 13.689 | 1.00 | 0.77 | C |
| ATOM | 1062 | CD1 | TYR  | A   | 270     | -6.177  | 33.728 | 15.054 | 1.00 | 0.77 | C |
| ATOM | 1063 | CD2 | TYR  | A   | 270     | -5.724  | 34.782 | 12.938 | 1.00 | 0.77 | C |
| ATOM | 1064 | CE1 | TYR  | A   | 270     | -5.253  | 34.565 | 15.668 | 1.00 | 0.77 | C |
| ATOM | 1065 | CE2 | TYR  | A   | 270     | -4.811  | 35.627 | 13.550 | 1.00 | 0.77 | C |
| ATOM | 1066 | CZ  | TYR  | A   | 270     | -4.566  | 35.508 | 14.909 | 1.00 | 0.77 | C |
| ATOM | 1067 | OH  | TYR  | A   | 270     | -3.581  | 36.260 | 15.462 | 1.00 | 0.77 | O |
| ATOM | 1068 | N   | ASPA | 271 | -8.876  | 35.914  | 13.697 | 1.00   | 0.79 | N    |   |
| ATOM | 1069 | CA  | ASPA | 271 | -8.845  | 37.372  | 13.488 | 1.00   | 0.79 | C    |   |

|      |      |     |      |     |         |        |        |        |      |      |   |
|------|------|-----|------|-----|---------|--------|--------|--------|------|------|---|
| ATOM | 1070 | C   | ASPA | 271 | -7.761  | 38.100 | 14.286 | 1.00   | 0.79 | C    |   |
| ATOM | 1071 | O   | ASPA | 271 | -7.092  | 38.981 | 13.754 | 1.00   | 0.79 | O    |   |
| ATOM | 1072 | CB  | ASPA | 271 | -10.226 | 37.987 | 13.744 | 1.00   | 0.79 | C    |   |
| ATOM | 1073 | CG  | ASPA | 271 | -11.289 | 37.525 | 12.736 | 1.00   | 0.79 | C    |   |
| ATOM | 1074 | OD1 | ASPA | 271 | -10.912 | 37.118 | 11.616 | 1.00   | 0.79 | O    |   |
| ATOM | 1075 | OD2 | ASPA | 271 | -12.477 | 37.670 | 13.095 | 1.00   | 0.79 | O    |   |
| ATOM | 1076 | N   | SERA | 272 | -7.592  | 37.711 | 15.550 | 1.00   | 0.87 | N    |   |
| ATOM | 1077 | CA  | SERA | 272 | -6.621  | 38.367 | 16.445 | 1.00   | 0.87 | C    |   |
| ATOM | 1078 | C   | SERA | 272 | -6.302  | 37.519 | 17.680 | 1.00   | 0.87 | C    |   |
| ATOM | 1079 | O   | SERA | 272 | -7.010  | 36.564 | 18.005 | 1.00   | 0.87 | O    |   |
| ATOM | 1080 | CB  | SERA | 272 | -7.159  | 39.737 | 16.881 | 1.00   | 0.87 | C    |   |
| ATOM | 1081 | OG  | SERA | 272 | -6.176  | 40.432 | 17.654 | 1.00   | 0.87 | O    |   |
| ATOM | 1082 | N   | GLYA | 273 | -5.170  | 37.881 | 18.287 | 1.00   | 0.92 | N    |   |
| ATOM | 1083 | CA  | GLYA | 273 | -4.626  | 37.242 | 19.496 | 1.00   | 0.92 | C    |   |
| ATOM | 1084 | C   | GLYA | 273 | -3.722  | 36.066 | 19.121 | 1.00   | 0.92 | C    |   |
| ATOM | 1085 | O   | GLYA | 273 | -3.337  | 35.881 | 17.967 | 1.00   | 0.92 | O    |   |
| ATOM | 1086 | N   | VALA | 274 | -3.459  | 35.240 | 20.119 | 1.00   | 0.88 | N    |   |
| ATOM | 1087 | CA  | VALA | 274 | -2.655  | 34.017 | 19.940 | 1.00   | 0.88 | C    |   |
| ATOM | 1088 | C   | VALA | 274 | -3.624  | 32.845 | 19.744 | 1.00   | 0.88 | C    |   |
| ATOM | 1089 | O   | VALA | 274 | -4.318  | 32.432 | 20.673 | 1.00   | 0.88 | O    |   |
| ATOM | 1090 | CB  | VALA | 274 | -1.722  | 33.784 | 21.145 | 1.00   | 0.88 | C    |   |
| ATOM | 1091 | CG1 | VALA | 274 | -0.913  | 32.492 | 20.986 | 1.00   | 0.88 | C    |   |
| ATOM | 1092 | CG2 | VALA | 274 | -0.746  | 34.951 | 21.332 | 1.00   | 0.88 | C    |   |
| ATOM | 1093 | N   | LEUA | 275 | -3.675  | 32.364 | 18.509 | 1.00   | 0.86 | N    |   |
| ATOM | 1094 | CA  | LEUA | 275 | -4.470  | 31.180 | 18.154 | 1.00   | 0.86 | C    |   |
| ATOM | 1095 | C   | LEUA | 275 | -3.914  | 29.972 | 18.922 | 1.00   | 0.86 | C    |   |
| ATOM | 1096 | O   | LEUA | 275 | -2.731  | 29.633 | 18.839 | 1.00   | 0.86 | O    |   |
| ATOM | 1097 | CB  | LEUA | 275 | -4.426  | 30.984 | 16.632 | 1.00   | 0.86 | C    |   |
| ATOM | 1098 | CG  | LEUA | 275 | -5.389  | 29.900 | 16.126 | 1.00   | 0.86 | C    |   |
| ATOM | 1099 | CD1 | LEUA | 275 | -5.738  | 30.164 | 14.663 | 1.00   | 0.86 | C    |   |
| ATOM | 1100 | CD2 | LEUA | 275 | -4.754  | 28.509 | 16.195 | 1.00   | 0.86 | C    |   |
| ATOM | 1101 | N   | GLYA | 276 | -4.845  | 29.341 | 19.637 | 1.00   | 0.87 | N    |   |
| ATOM | 1102 | CA  | GLYA | 276 | -4.558  | 28.167 | 20.480 | 1.00   | 0.87 | C    |   |
| ATOM | 1103 | C   | GLYA | 276 | -5.251  | 26.900 | 19.968 | 1.00   | 0.87 | C    |   |
| ATOM | 1104 | O   | GLYA | 276 | -5.182  | 25.841 | 20.559 | 1.00   | 0.87 | O    |   |
| ATOM | 1105 | N   | GLYA | 277 | -6.105  | 27.065 | 18.965 | 1.00   | 0.84 | N    |   |
| ATOM | 1106 | CA  | GLYA | 277 | -6.864  | 25.942 | 18.413 | 1.00   | 0.84 | C    |   |
| ATOM | 1107 | C   | GLYA | 277 | -8.278  | 26.394 | 18.037 | 1.00   | 0.84 | C    |   |
| ATOM | 1108 | O   | GLYA | 277 | -8.604  | 27.578 | 18.110 | 1.00   | 0.84 | O    |   |
| ATOM | 1109 | N   | ALA  | A   | 278     | -9.087 | 25.461 | 17.550 | 1.00 | 0.81 | N |
| ATOM | 1110 | CA  | ALA  | A   | 278     | -8.732 | 24.035 | 17.392 | 1.00 | 0.81 | C |
| ATOM | 1111 | C   | ALA  | A   | 278     | -8.414 | 23.698 | 15.933 | 1.00 | 0.81 | C |

|      |         |       |     |        |        |        |        |      |      |   |
|------|---------|-------|-----|--------|--------|--------|--------|------|------|---|
| ATOM | 1112O   | ALA   | A   | 278    | -9.039 | 24.231 | 15.014 | 1.00 | 0.81 | O |
| ATOM | 1113CB  | ALA   | A   | 278    | -9.873 | 23.163 | 17.917 | 1.00 | 0.81 | C |
| ATOM | 1114N   | CYSA  | 279 | -7.435 | 22.808 | 15.786 | 1.00   | 0.85 | N    |   |
| ATOM | 1115CA  | CYSA  | 279 | -6.926 | 22.331 | 14.492 | 1.00   | 0.85 | C    |   |
| ATOM | 1116C   | CYSA  | 279 | -6.339 | 20.932 | 14.566 | 1.00   | 0.85 | C    |   |
| ATOM | 1117O   | CYSA  | 279 | -5.717 | 20.591 | 15.571 | 1.00   | 0.85 | O    |   |
| ATOM | 1118CB  | CYSA  | 279 | -5.871 | 23.285 | 13.918 | 1.00   | 0.85 | C    |   |
| ATOM | 1119SG  | CYSA  | 279 | -4.437 | 23.595 | 14.991 | 1.00   | 0.85 | S    |   |
| ATOM | 1120N   | GLYA  | 280 | -6.580 | 20.160 | 13.498 | 1.00   | 0.88 | N    |   |
| ATOM | 1121CA  | GLYA  | 280 | -5.980 | 18.823 | 13.369 | 1.00   | 0.88 | C    |   |
| ATOM | 1122C   | GLYA  | 280 | -4.495 | 18.933 | 12.994 | 1.00   | 0.88 | C    |   |
| ATOM | 1123O   | GLYA  | 280 | -3.914 | 20.015 | 12.939 | 1.00   | 0.88 | O    |   |
| ATOM | 1124N   | THR   | A   | 281    | -3.949 | 17.794 | 12.589 | 1.00 | 0.88 | N |
| ATOM | 1125CA  | THR   | A   | 281    | -2.538 | 17.712 | 12.151 | 1.00 | 0.88 | C |
| ATOM | 1126C   | THR   | A   | 281    | -2.372 | 17.085 | 10.757 | 1.00 | 0.88 | C |
| ATOM | 1127O   | THR   | A   | 281    | -1.284 | 16.675 | 10.362 | 1.00 | 0.88 | O |
| ATOM | 1128CB  | THR   | A   | 281    | -1.702 | 16.926 | 13.173 | 1.00 | 0.88 | C |
| ATOM | 1129OG1 | THR   | A   | 281    | -2.303 | 15.643 | 13.369 | 1.00 | 0.88 | O |
| ATOM | 1130CG2 | THR   | A   | 281    | -1.556 | 17.678 | 14.502 | 1.00 | 0.88 | C |
| ATOM | 1131N   | ASP A | 282 | -3.479 | 17.006 | 10.019 | 1.00   | 0.84 | N    |   |
| ATOM | 1132CA  | ASP A | 282 | -3.470 | 16.571 | 8.617  | 1.00   | 0.84 | C    |   |
| ATOM | 1133C   | ASP A | 282 | -3.057 | 17.755 | 7.732  | 1.00   | 0.84 | C    |   |
| ATOM | 1134O   | ASP A | 282 | -3.860 | 18.634 | 7.422  | 1.00   | 0.84 | O    |   |
| ATOM | 1135CB  | ASP A | 282 | -4.846 | 16.033 | 8.202  | 1.00   | 0.84 | C    |   |
| ATOM | 1136CG  | ASP A | 282 | -4.802 | 15.329 | 6.838  | 1.00   | 0.84 | C    |   |
| ATOM | 1137OD1 | ASP A | 282 | -3.731 | 15.360 | 6.192  | 1.00   | 0.84 | O    |   |
| ATOM | 1138OD2 | ASP A | 282 | -5.847 | 14.743 | 6.490  | 1.00   | 0.84 | O    |   |
| ATOM | 1139N   | LEUA  | 283 | -1.781 | 17.756 | 7.383  | 1.00   | 0.84 | N    |   |
| ATOM | 1140CA  | LEUA  | 283 | -1.161 | 18.848 | 6.609  | 1.00   | 0.84 | C    |   |
| ATOM | 1141C   | LEUA  | 283 | -1.860 | 19.060 | 5.263  | 1.00   | 0.84 | C    |   |
| ATOM | 1142O   | LEUA  | 283 | -2.107 | 18.110 | 4.522  | 1.00   | 0.84 | O    |   |
| ATOM | 1143CB  | LEUA  | 283 | 0.314  | 18.519 | 6.361  | 1.00   | 0.84 | C    |   |
| ATOM | 1144CG  | LEUA  | 283 | 1.093  | 18.257 | 7.656  | 1.00   | 0.84 | C    |   |
| ATOM | 1145CD1 | LEUA  | 283 | 2.515  | 17.811 | 7.318  | 1.00   | 0.84 | C    |   |
| ATOM | 1146CD2 | LEUA  | 283 | 1.119  | 19.488 | 8.566  | 1.00   | 0.84 | C    |   |
| ATOM | 1147N   | ASN   | A   | 284    | -2.186 | 20.318 | 5.000  | 1.00 | 0.83 | N |
| ATOM | 1148CA  | ASN   | A   | 284    | -2.850 | 20.710 | 3.739  | 1.00 | 0.83 | C |
| ATOM | 1149C   | ASN   | A   | 284    | -2.517 | 22.124 | 3.239  | 1.00 | 0.83 | C |
| ATOM | 1150O   | ASN   | A   | 284    | -2.985 | 22.529 | 2.175  | 1.00 | 0.83 | O |
| ATOM | 1151CB  | ASN   | A   | 284    | -4.369 | 20.556 | 3.879  | 1.00 | 0.83 | C |
| ATOM | 1152CG  | ASN   | A   | 284    | -4.966 | 21.457 | 4.962  | 1.00 | 0.83 | C |
| ATOM | 1153OD1 | ASN   | A   | 284    | -4.496 | 22.524 | 5.339  | 1.00 | 0.83 | O |

|      |            |       |     |        |        |        |        |      |      |   |
|------|------------|-------|-----|--------|--------|--------|--------|------|------|---|
| ATOM | 1154ND2ASN | A     | 284 | -6.033 | 20.989 | 5.535  | 1.00   | 0.83 | N    |   |
| ATOM | 1155N      | HIS A | 285 | -1.812 | 22.896 | 4.062  | 1.00   | 0.82 | N    |   |
| ATOM | 1156CA     | HIS A | 285 | -1.500 | 24.294 | 3.741  | 1.00   | 0.82 | C    |   |
| ATOM | 1157C      | HIS A | 285 | -0.029 | 24.583 | 4.036  | 1.00   | 0.82 | C    |   |
| ATOM | 1158O      | HIS A | 285 | 0.498  | 24.185 | 5.075  | 1.00   | 0.82 | O    |   |
| ATOM | 1159CB     | HIS A | 285 | -2.400 | 25.208 | 4.577  | 1.00   | 0.82 | C    |   |
| ATOM | 1160CG     | HIS A | 285 | -2.402 | 26.642 | 4.044  | 1.00   | 0.82 | C    |   |
| ATOM | 1161ND1    | HIS A | 285 | -2.327 | 27.007 | 2.767  | 1.00   | 0.82 | N    |   |
| ATOM | 1162CD2    | HIS A | 285 | -2.523 | 27.739 | 4.785  | 1.00   | 0.82 | C    |   |
| ATOM | 1163CE1    | HIS A | 285 | -2.411 | 28.337 | 2.723  | 1.00   | 0.82 | C    |   |
| ATOM | 1164NE2    | HIS A | 285 | -2.526 | 28.788 | 3.967  | 1.00   | 0.82 | N    |   |
| ATOM | 1165N      | ALA   | A   | 286    | 0.570  | 25.339 | 3.133  | 1.00 | 0.88 | N |
| ATOM | 1166CA     | ALA   | A   | 286    | 1.978  | 25.739 | 3.237  | 1.00 | 0.88 | C |
| ATOM | 1167C      | ALA   | A   | 286    | 2.091  | 27.245 | 3.464  | 1.00 | 0.88 | C |
| ATOM | 1168O      | ALA   | A   | 286    | 1.558  | 28.051 | 2.700  | 1.00 | 0.88 | O |
| ATOM | 1169CB     | ALA   | A   | 286    | 2.631  | 25.381 | 1.914  | 1.00 | 0.88 | C |
| ATOM | 1170N      | ILE A | 287 | 2.730  | 27.575 | 4.574  | 1.00   | 0.80 | N    |   |
| ATOM | 1171CA     | ILE A | 287 | 2.940  | 28.971 | 5.014  | 1.00   | 0.80 | C    |   |
| ATOM | 1172C      | ILE A | 287 | 4.404  | 29.152 | 5.467  | 1.00   | 0.80 | C    |   |
| ATOM | 1173O      | ILE A | 287 | 5.225  | 28.248 | 5.327  | 1.00   | 0.80 | O    |   |
| ATOM | 1174CB     | ILE A | 287 | 1.922  | 29.277 | 6.127  | 1.00   | 0.80 | C    |   |
| ATOM | 1175CG1    | ILE A | 287 | 2.062  | 28.227 | 7.241  | 1.00   | 0.80 | C    |   |
| ATOM | 1176CG2    | ILE A | 287 | 0.492  | 29.330 | 5.567  | 1.00   | 0.80 | C    |   |
| ATOM | 1177CD1    | ILE A | 287 | 1.135  | 28.429 | 8.431  | 1.00   | 0.80 | C    |   |
| ATOM | 1178N      | THR   | A   | 288    | 4.685  | 30.228 | 6.192  | 1.00 | 0.87 | N |
| ATOM | 1179CA     | THR   | A   | 288    | 6.056  | 30.492 | 6.696  | 1.00 | 0.87 | C |
| ATOM | 1180C      | THR   | A   | 288    | 6.122  | 31.249 | 8.033  | 1.00 | 0.87 | C |
| ATOM | 1181O      | THR   | A   | 288    | 5.450  | 32.265 | 8.234  | 1.00 | 0.87 | O |
| ATOM | 1182CB     | THR   | A   | 288    | 6.836  | 31.309 | 5.669  | 1.00 | 0.87 | C |
| ATOM | 1183OG1    | THR   | A   | 288    | 8.184  | 31.440 | 6.130  | 1.00 | 0.87 | O |
| ATOM | 1184CG2    | THR   | A   | 288    | 6.165  | 32.675 | 5.468  | 1.00 | 0.87 | C |
| ATOM | 1185N      | ALA   | A   | 289    | 6.888  | 30.697 | 8.955  | 1.00 | 0.94 | N |
| ATOM | 1186CA     | ALA   | A   | 289    | 7.137  | 31.366 | 10.242 | 1.00 | 0.94 | C |
| ATOM | 1187C      | ALA   | A   | 289    | 8.143  | 32.496 | 10.006 | 1.00 | 0.94 | C |
| ATOM | 1188O      | ALA   | A   | 289    | 9.229  | 32.276 | 9.470  | 1.00 | 0.94 | O |
| ATOM | 1189CB     | ALA   | A   | 289    | 7.682  | 30.360 | 11.255 | 1.00 | 0.94 | C |
| ATOM | 1190N      | VALA  | 290 | 7.750  | 33.696 | 10.401 | 1.00   | 0.87 | N    |   |
| ATOM | 1191CA     | VALA  | 290 | 8.595  | 34.899 | 10.224 | 1.00   | 0.87 | C    |   |
| ATOM | 1192C      | VALA  | 290 | 9.020  | 35.529 | 11.563 | 1.00   | 0.87 | C    |   |
| ATOM | 1193O      | VALA  | 290 | 9.520  | 36.654 | 11.615 | 1.00   | 0.87 | O    |   |
| ATOM | 1194CB     | VALA  | 290 | 7.913  | 35.934 | 9.305  | 1.00   | 0.87 | C    |   |
| ATOM | 1195CG1    | VALA  | 290 | 7.661  | 35.397 | 7.896  | 1.00   | 0.87 | C    |   |

|      |         |         |     |       |        |        |        |      |      |   |
|------|---------|---------|-----|-------|--------|--------|--------|------|------|---|
| ATOM | 1196CG2 | VALA    | 290 | 6.562 | 36.374 | 9.840  | 1.00   | 0.87 | C    |   |
| ATOM | 1197N   | GLYA    | 291 | 8.764 | 34.790 | 12.647 | 1.00   | 0.96 | N    |   |
| ATOM | 1198CA  | GLYA    | 291 | 9.179 | 35.213 | 13.986 | 1.00   | 0.96 | C    |   |
| ATOM | 1199C   | GLYA    | 291 | 8.590 | 34.335 | 15.085 | 1.00   | 0.96 | C    |   |
| ATOM | 1200O   | GLYA    | 291 | 7.800 | 33.424 | 14.832 | 1.00   | 0.96 | O    |   |
| ATOM | 1201    | N TYR   | A   | 292   | 8.962  | 34.707 | 16.297 | 1.00 | 0.88 | N |
| ATOM | 1202    | CA TYR  | A   | 292   | 8.496  | 34.073 | 17.539 | 1.00 | 0.88 | C |
| ATOM | 1203    | C TYR   | A   | 292   | 8.719  | 35.058 | 18.691 | 1.00 | 0.88 | C |
| ATOM | 1204    | O TYR   | A   | 292   | 9.539  | 35.974 | 18.590 | 1.00 | 0.88 | O |
| ATOM | 1205    | CB TYR  | A   | 292   | 9.255  | 32.762 | 17.805 | 1.00 | 0.88 | C |
| ATOM | 1206    | CG TYR  | A   | 292   | 10.735 | 32.969 | 18.142 | 1.00 | 0.88 | C |
| ATOM | 1207    | CD1 TYR | A   | 292   | 11.107 | 33.266 | 19.449 | 1.00 | 0.88 | C |
| ATOM | 1208    | CD2 TYR | A   | 292   | 11.707 | 32.803 | 17.168 | 1.00 | 0.88 | C |
| ATOM | 1209    | CE1 TYR | A   | 292   | 12.446 | 33.391 | 19.784 | 1.00 | 0.88 | C |
| ATOM | 1210    | CE2 TYR | A   | 292   | 13.049 | 32.917 | 17.501 | 1.00 | 0.88 | C |
| ATOM | 1211    | CZ TYR  | A   | 292   | 13.418 | 33.211 | 18.808 | 1.00 | 0.88 | C |
| ATOM | 1212    | OH TYR  | A   | 292   | 14.731 | 33.320 | 19.130 | 1.00 | 0.88 | O |
| ATOM | 1213    | N GLYA  | 293 | 8.008 | 34.786 | 19.783 | 1.00   | 0.89 | N    |   |
| ATOM | 1214    | CA GLYA | 293 | 8.151 | 35.568 | 21.018 | 1.00   | 0.89 | C    |   |
| ATOM | 1215    | C GLYA  | 293 | 7.217 | 35.028 | 22.094 | 1.00   | 0.89 | C    |   |
| ATOM | 1216    | O GLYA  | 293 | 6.751 | 33.888 | 22.036 | 1.00   | 0.89 | O    |   |
| ATOM | 1217    | N THR   | A   | 294   | 6.969  | 35.885 | 23.068 | 1.00 | 0.76 | N |
| ATOM | 1218    | CA THR  | A   | 294   | 6.100  | 35.556 | 24.209 | 1.00 | 0.76 | C |
| ATOM | 1219    | C THR   | A   | 294   | 5.296  | 36.811 | 24.545 | 1.00 | 0.76 | C |
| ATOM | 1220    | O THR   | A   | 294   | 5.862  | 37.894 | 24.688 | 1.00 | 0.76 | O |
| ATOM | 1221    | CB THR  | A   | 294   | 6.958  | 35.127 | 25.409 | 1.00 | 0.76 | C |
| ATOM | 1222    | OG1 THR | A   | 294   | 7.796  | 34.034 | 25.025 | 1.00 | 0.76 | O |
| ATOM | 1223    | CG2 THR | A   | 294   | 6.111  | 34.698 | 26.606 | 1.00 | 0.76 | C |
| ATOM | 1224    | N ALA   | A   | 295   | 3.979  | 36.648 | 24.595 | 1.00 | 0.72 | N |
| ATOM | 1225    | CA ALA  | A   | 295   | 3.080  | 37.749 | 24.993 | 1.00 | 0.72 | C |
| ATOM | 1226    | C ALA   | A   | 295   | 3.432  | 38.190 | 26.423 | 1.00 | 0.72 | C |
| ATOM | 1227    | O ALA   | A   | 295   | 4.012  | 37.416 | 27.183 | 1.00 | 0.72 | O |
| ATOM | 1228    | CB ALA  | A   | 295   | 1.625  | 37.279 | 24.914 | 1.00 | 0.72 | C |
| ATOM | 1229    | N ALA   | A   | 296   | 3.013  | 39.396 | 26.798 | 1.00 | 0.61 | N |
| ATOM | 1230    | CA ALA  | A   | 296   | 3.234  | 39.917 | 28.164 | 1.00 | 0.61 | C |
| ATOM | 1231    | C ALA   | A   | 296   | 2.671  | 38.973 | 29.241 | 1.00 | 0.61 | C |
| ATOM | 1232    | O ALA   | A   | 296   | 3.291  | 38.757 | 30.276 | 1.00 | 0.61 | O |
| ATOM | 1233    | CB ALA  | A   | 296   | 2.584  | 41.295 | 28.305 | 1.00 | 0.61 | C |
| ATOM | 1234    | N ASPA  | 297 | 1.574 | 38.300 | 28.887 | 1.00   | 0.57 | N    |   |
| ATOM | 1235    | CA ASPA | 297 | 0.938 | 37.293 | 29.758 | 1.00   | 0.57 | C    |   |
| ATOM | 1236    | C ASPA  | 297 | 1.661 | 35.938 | 29.836 | 1.00   | 0.57 | C    |   |
| ATOM | 1237    | O ASPA  | 297 | 1.202 | 35.033 | 30.531 | 1.00   | 0.57 | O    |   |



|      |      |     |     |   |     |        |        |        |      |      |   |
|------|------|-----|-----|---|-----|--------|--------|--------|------|------|---|
| ATOM | 1238 | CB  | ASP | A | 297 | -0.543 | 37.130 | 29.400 | 1.00 | 0.57 | C |
| ATOM | 1239 | CG  | ASP | A | 297 | -1.368 | 38.374 | 29.759 | 1.00 | 0.57 | C |
| ATOM | 1240 | OD1 | ASP | A | 297 | -0.861 | 39.233 | 30.515 | 1.00 | 0.57 | O |
| ATOM | 1241 | OD2 | ASP | A | 297 | -2.492 | 38.461 | 29.221 | 1.00 | 0.57 | O |
| ATOM | 1242 | N   | GLY | A | 298 | 2.732  | 35.804 | 29.047 | 1.00 | 0.67 | N |
| ATOM | 1243 | CA  | GLY | A | 298 | 3.596  | 34.611 | 29.080 | 1.00 | 0.67 | C |
| ATOM | 1244 | C   | GLY | A | 298 | 3.168  | 33.483 | 28.130 | 1.00 | 0.67 | C |
| ATOM | 1245 | O   | GLY | A | 298 | 3.598  | 32.345 | 28.297 | 1.00 | 0.67 | O |
| ATOM | 1246 | N   | THR | A | 299 | 2.442  | 33.832 | 27.071 | 1.00 | 0.73 | N |
| ATOM | 1247 | CA  | THR | A | 299 | 2.039  | 32.853 | 26.040 | 1.00 | 0.73 | C |
| ATOM | 1248 | C   | THR | A | 299 | 3.053  | 32.897 | 24.894 | 1.00 | 0.73 | C |
| ATOM | 1249 | O   | THR | A | 299 | 3.149  | 33.901 | 24.184 | 1.00 | 0.73 | O |
| ATOM | 1250 | CB  | THR | A | 299 | 0.632  | 33.146 | 25.491 | 1.00 | 0.73 | C |
| ATOM | 1251 | OG1 | THR | A | 299 | -0.295 | 33.240 | 26.576 | 1.00 | 0.73 | O |
| ATOM | 1252 | CG2 | THR | A | 299 | 0.167  | 32.071 | 24.502 | 1.00 | 0.73 | C |
| ATOM | 1253 | N   | ARG | A | 300 | 3.815  | 31.816 | 24.775 | 1.00 | 0.72 | N |
| ATOM | 1254 | CA  | ARG | A | 300 | 4.763  | 31.643 | 23.657 | 1.00 | 0.72 | C |
| ATOM | 1255 | C   | ARG | A | 300 | 3.996  | 31.465 | 22.342 | 1.00 | 0.72 | C |
| ATOM | 1256 | O   | ARG | A | 300 | 2.956  | 30.806 | 22.300 | 1.00 | 0.72 | O |
| ATOM | 1257 | CB  | ARG | A | 300 | 5.644  | 30.417 | 23.888 | 1.00 | 0.72 | C |
| ATOM | 1258 | CG  | ARG | A | 300 | 6.523  | 30.583 | 25.132 | 1.00 | 0.72 | C |
| ATOM | 1259 | CD  | ARG | A | 300 | 7.442  | 29.384 | 25.367 | 1.00 | 0.72 | C |
| ATOM | 1260 | NE  | ARG | A | 300 | 6.642  | 28.186 | 25.640 | 1.00 | 0.72 | N |
| ATOM | 1261 | CZ  | ARG | A | 300 | 6.426  | 27.190 | 24.785 | 1.00 | 0.72 | C |
| ATOM | 1262 | NH1 | ARG | A | 300 | 6.945  | 27.220 | 23.557 | 1.00 | 0.72 | N |
| ATOM | 1263 | NH2 | ARG | A | 300 | 5.697  | 26.210 | 25.197 | 1.00 | 0.72 | N |
| ATOM | 1264 | N   | TYR | A | 301 | 4.509  | 32.090 | 21.293 | 1.00 | 0.84 | N |
| ATOM | 1265 | CA  | TYR | A | 301 | 3.870  | 32.040 | 19.965 | 1.00 | 0.84 | C |
| ATOM | 1266 | C   | TYR | A | 301 | 4.884  | 32.029 | 18.816 | 1.00 | 0.84 | C |
| ATOM | 1267 | O   | TYR | A | 301 | 6.037  | 32.432 | 18.980 | 1.00 | 0.84 | O |
| ATOM | 1268 | CB  | TYR | A | 301 | 2.886  | 33.210 | 19.805 | 1.00 | 0.84 | C |
| ATOM | 1269 | CG  | TYR | A | 301 | 3.593  | 34.566 | 19.812 | 1.00 | 0.84 | C |
| ATOM | 1270 | CD1 | TYR | A | 301 | 4.107  | 35.079 | 18.628 | 1.00 | 0.84 | C |
| ATOM | 1271 | CD2 | TYR | A | 301 | 3.723  | 35.275 | 20.997 | 1.00 | 0.84 | C |
| ATOM | 1272 | CE1 | TYR | A | 301 | 4.754  | 36.305 | 18.626 | 1.00 | 0.84 | C |
| ATOM | 1273 | CE2 | TYR | A | 301 | 4.361  | 36.506 | 20.998 | 1.00 | 0.84 | C |
| ATOM | 1274 | CZ  | TYR | A | 301 | 4.873  | 37.019 | 19.811 | 1.00 | 0.84 | C |
| ATOM | 1275 | OH  | TYR | A | 301 | 5.484  | 38.230 | 19.805 | 1.00 | 0.84 | O |
| ATOM | 1276 | N   | TRP | A | 302 | 4.370  | 31.623 | 17.665 | 1.00 | 0.90 | N |
| ATOM | 1277 | CA  | TRP | A | 302 | 5.044  | 31.749 | 16.365 | 1.00 | 0.90 | C |
| ATOM | 1278 | C   | TRP | A | 302 | 4.253  | 32.788 | 15.572 | 1.00 | 0.90 | C |
| ATOM | 1279 | O   | TRP | A | 302 | 3.026  | 32.869 | 15.665 | 1.00 | 0.90 | O |

|      |      |     |     |   |     |        |        |        |      |      |   |
|------|------|-----|-----|---|-----|--------|--------|--------|------|------|---|
| ATOM | 1280 | CB  | TRP | A | 302 | 4.989  | 30.450 | 15.557 | 1.00 | 0.90 | C |
| ATOM | 1281 | CG  | TRP | A | 302 | 5.585  | 29.236 | 16.262 | 1.00 | 0.90 | C |
| ATOM | 1282 | CD1 | TRP | A | 302 | 4.922  | 28.163 | 16.693 | 1.00 | 0.90 | C |
| ATOM | 1283 | CD2 | TRP | A | 302 | 6.935  | 28.944 | 16.328 | 1.00 | 0.90 | C |
| ATOM | 1284 | NE1 | TRP | A | 302 | 5.793  | 27.211 | 17.028 | 1.00 | 0.90 | N |
| ATOM | 1285 | CE2 | TRP | A | 302 | 7.029  | 27.653 | 16.821 | 1.00 | 0.90 | C |
| ATOM | 1286 | CE3 | TRP | A | 302 | 8.074  | 29.681 | 16.032 | 1.00 | 0.90 | C |
| ATOM | 1287 | CZ2 | TRP | A | 302 | 8.277  | 27.091 | 17.046 | 1.00 | 0.90 | C |
| ATOM | 1288 | CZ3 | TRP | A | 302 | 9.324  | 29.113 | 16.239 | 1.00 | 0.90 | C |
| ATOM | 1289 | CH2 | TRP | A | 302 | 9.416  | 27.823 | 16.748 | 1.00 | 0.90 | C |
| ATOM | 1290 | N   | LEU | A | 303 | 4.984  | 33.571 | 14.805 | 1.00 | 0.91 | N |
| ATOM | 1291 | CA  | LEU | A | 303 | 4.355  | 34.560 | 13.933 | 1.00 | 0.91 | C |
| ATOM | 1292 | C   | LEU | A | 303 | 4.455  | 34.060 | 12.503 | 1.00 | 0.91 | C |
| ATOM | 1293 | O   | LEU | A | 303 | 5.541  | 33.895 | 11.950 | 1.00 | 0.91 | O |
| ATOM | 1294 | CB  | LEU | A | 303 | 5.102  | 35.864 | 14.087 | 1.00 | 0.91 | C |
| ATOM | 1295 | CG  | LEU | A | 303 | 4.228  | 36.994 | 13.590 | 1.00 | 0.91 | C |
| ATOM | 1296 | CD1 | LEU | A | 303 | 4.670  | 38.132 | 14.470 | 1.00 | 0.91 | C |
| ATOM | 1297 | CD2 | LEU | A | 303 | 4.454  | 37.353 | 12.127 | 1.00 | 0.91 | C |
| ATOM | 1298 | N   | MET | A | 304 | 3.283  | 33.811 | 11.955 | 1.00 | 0.87 | N |
| ATOM | 1299 | CA  | MET | A | 304 | 3.177  | 33.185 | 10.645 | 1.00 | 0.87 | C |
| ATOM | 1300 | C   | MET | A | 304 | 2.593  | 34.146 | 9.608  | 1.00 | 0.87 | C |
| ATOM | 1301 | O   | MET | A | 304 | 1.529  | 34.722 | 9.835  | 1.00 | 0.87 | O |
| ATOM | 1302 | CB  | MET | A | 304 | 2.254  | 32.001 | 10.873 | 1.00 | 0.87 | C |
| ATOM | 1303 | CG  | MET | A | 304 | 2.034  | 31.290 | 9.558  | 1.00 | 0.87 | C |
| ATOM | 1304 | SD  | MET | A | 304 | 3.556  | 30.462 | 9.014  | 1.00 | 0.87 | S |
| ATOM | 1305 | CE  | MET | A | 304 | 3.947  | 29.397 | 10.367 | 1.00 | 0.87 | C |
| ATOM | 1306 | N   | LYS | A | 305 | 3.194  | 34.094 | 8.425  | 1.00 | 0.84 | N |
| ATOM | 1307 | CA  | LYS | A | 305 | 2.721  | 34.843 | 7.250  | 1.00 | 0.84 | C |
| ATOM | 1308 | C   | LYS | A | 305 | 1.875  | 33.916 | 6.369  | 1.00 | 0.84 | C |
| ATOM | 1309 | O   | LYS | A | 305 | 2.363  | 32.898 | 5.870  | 1.00 | 0.84 | O |
| ATOM | 1310 | CB  | LYS | A | 305 | 3.927  | 35.372 | 6.469  | 1.00 | 0.84 | C |
| ATOM | 1311 | CG  | LYS | A | 305 | 3.512  | 36.291 | 5.318  | 1.00 | 0.84 | C |
| ATOM | 1312 | CD  | LYS | A | 305 | 4.737  | 36.764 | 4.540  | 1.00 | 0.84 | C |
| ATOM | 1313 | CE  | LYS | A | 305 | 4.323  | 37.722 | 3.425  | 1.00 | 0.84 | C |
| ATOM | 1314 | NZ  | LYS | A | 305 | 5.486  | 38.185 | 2.658  | 1.00 | 0.84 | N |
| ATOM | 1315 | N   | ASN | A | 306 | 0.591  | 34.247 | 6.299  | 1.00 | 0.86 | N |
| ATOM | 1316 | CA  | ASN | A | 306 | -0.354 | 33.502 | 5.453  | 1.00 | 0.86 | C |
| ATOM | 1317 | C   | ASN | A | 306 | -0.470 | 34.195 | 4.084  | 1.00 | 0.86 | C |
| ATOM | 1318 | O   | ASN | A | 306 | -0.052 | 35.337 | 3.899  | 1.00 | 0.86 | O |
| ATOM | 1319 | CB  | ASN | A | 306 | -1.715 | 33.429 | 6.152  | 1.00 | 0.86 | C |
| ATOM | 1320 | CG  | ASN | A | 306 | -2.580 | 32.264 | 5.655  | 1.00 | 0.86 | C |
| ATOM | 1321 | OD1 | ASN | A | 306 | -2.279 | 31.540 | 4.712  | 1.00 | 0.86 | O |

|      |      |          |   |     |         |        |       |      |      |   |
|------|------|----------|---|-----|---------|--------|-------|------|------|---|
| ATOM | 1322 | ND2ASN   | A | 306 | -3.657  | 32.017 | 6.358 | 1.00 | 0.86 | N |
| ATOM | 1323 | N SERA   |   | 307 | -1.040  | 33.476 | 3.127 | 1.00 | 0.84 | N |
| ATOM | 1324 | CA SERA  |   | 307 | -1.199  | 33.957 | 1.740 | 1.00 | 0.84 | C |
| ATOM | 1325 | C SERA   |   | 307 | -2.675  | 34.135 | 1.344 | 1.00 | 0.84 | C |
| ATOM | 1326 | O SERA   |   | 307 | -3.068  | 33.932 | 0.192 | 1.00 | 0.84 | O |
| ATOM | 1327 | CB SERA  |   | 307 | -0.476  | 32.995 | 0.793 | 1.00 | 0.84 | C |
| ATOM | 1328 | OG SERA  |   | 307 | -0.988  | 31.678 | 1.002 | 1.00 | 0.84 | O |
| ATOM | 1329 | N TRPA   |   | 308 | -3.464  | 34.621 | 2.303 | 1.00 | 0.75 | N |
| ATOM | 1330 | CA TRPA  |   | 308 | -4.904  | 34.886 | 2.095 | 1.00 | 0.75 | C |
| ATOM | 1331 | C TRPA   |   | 308 | -5.253  | 36.380 | 2.136 | 1.00 | 0.75 | C |
| ATOM | 1332 | O TRPA   |   | 308 | -6.400  | 36.769 | 2.364 | 1.00 | 0.75 | O |
| ATOM | 1333 | CB TRPA  |   | 308 | -5.736  | 34.115 | 3.131 | 1.00 | 0.75 | C |
| ATOM | 1334 | CG TRPA  |   | 308 | -5.606  | 32.593 | 3.015 | 1.00 | 0.75 | C |
| ATOM | 1335 | CD1 TRPA |   | 308 | -5.120  | 31.901 | 1.985 | 1.00 | 0.75 | C |
| ATOM | 1336 | CD2 TRPA |   | 308 | -5.971  | 31.681 | 3.991 | 1.00 | 0.75 | C |
| ATOM | 1337 | NE1 TRPA |   | 308 | -5.156  | 30.601 | 2.263 | 1.00 | 0.75 | N |
| ATOM | 1338 | CE2 TRPA |   | 308 | -5.669  | 30.429 | 3.479 | 1.00 | 0.75 | C |
| ATOM | 1339 | CE3 TRPA |   | 308 | -6.573  | 31.810 | 5.236 | 1.00 | 0.75 | C |
| ATOM | 1340 | CZ2 TRPA |   | 308 | -5.971  | 29.293 | 4.218 | 1.00 | 0.75 | C |
| ATOM | 1341 | CZ3 TRPA |   | 308 | -6.885  | 30.672 | 5.972 | 1.00 | 0.75 | C |
| ATOM | 1342 | CH2 TRPA |   | 308 | -6.583  | 29.414 | 5.461 | 1.00 | 0.75 | C |
| ATOM | 1343 | N GLYA   |   | 309 | -4.249  | 37.203 | 1.802 | 1.00 | 0.82 | N |
| ATOM | 1344 | CA GLYA  |   | 309 | -4.409  | 38.666 | 1.768 | 1.00 | 0.82 | C |
| ATOM | 1345 | C GLYA   |   | 309 | -4.291  | 39.274 | 3.170 | 1.00 | 0.82 | C |
| ATOM | 1346 | O GLYA   |   | 309 | -4.491  | 38.617 | 4.190 | 1.00 | 0.82 | O |
| ATOM | 1347 | N ALA    | A | 310 | -4.018  | 40.573 | 3.165 | 1.00 | 0.81 | N |
| ATOM | 1348 | CA ALA   | A | 310 | -3.881  | 41.377 | 4.398 | 1.00 | 0.81 | C |
| ATOM | 1349 | C ALA    | A | 310 | -5.175  | 41.429 | 5.229 | 1.00 | 0.81 | C |
| ATOM | 1350 | O ALA    | A | 310 | -5.148  | 41.705 | 6.424 | 1.00 | 0.81 | O |
| ATOM | 1351 | CB ALA   | A | 310 | -3.441  | 42.796 | 4.034 | 1.00 | 0.81 | C |
| ATOM | 1352 | N SERA   |   | 311 | -6.296  | 41.174 | 4.553 | 1.00 | 0.78 | N |
| ATOM | 1353 | CA SERA  |   | 311 | -7.644  | 41.168 | 5.157 | 1.00 | 0.78 | C |
| ATOM | 1354 | C SERA   |   | 311 | -7.843  | 40.056 | 6.204 | 1.00 | 0.78 | C |
| ATOM | 1355 | O SERA   |   | 311 | -8.707  | 40.160 | 7.073 | 1.00 | 0.78 | O |
| ATOM | 1356 | CB SERA  |   | 311 | -8.701  | 41.038 | 4.056 | 1.00 | 0.78 | C |
| ATOM | 1357 | OG SERA  |   | 311 | -10.006 | 41.180 | 4.622 | 1.00 | 0.78 | O |
| ATOM | 1358 | N TRPA   |   | 312 | -7.043  | 38.995 | 6.103 | 1.00 | 0.78 | N |
| ATOM | 1359 | CA TRPA  |   | 312 | -7.153  | 37.836 | 7.006 | 1.00 | 0.78 | C |
| ATOM | 1360 | C TRPA   |   | 312 | -6.243  | 37.995 | 8.231 | 1.00 | 0.78 | C |
| ATOM | 1361 | O TRPA   |   | 312 | -5.128  | 38.504 | 8.135 | 1.00 | 0.78 | O |
| ATOM | 1362 | CB TRPA  |   | 312 | -6.790  | 36.568 | 6.231 | 1.00 | 0.78 | C |
| ATOM | 1363 | CG TRPA  |   | 312 | -6.940  | 35.314 | 7.095 | 1.00 | 0.78 | C |

|      |      |           |     |        |        |        |      |      |   |
|------|------|-----------|-----|--------|--------|--------|------|------|---|
| ATOM | 1364 | CD1 TRP A | 312 | -8.057 | 34.615 | 7.272  | 1.00 | 0.78 | C |
| ATOM | 1365 | CD2 TRP A | 312 | -5.947 | 34.715 | 7.856  | 1.00 | 0.78 | C |
| ATOM | 1366 | NE1 TRP A | 312 | -7.817 | 33.597 | 8.096  | 1.00 | 0.78 | N |
| ATOM | 1367 | CE2 TRP A | 312 | -6.540 | 33.625 | 8.471  | 1.00 | 0.78 | C |
| ATOM | 1368 | CE3 TRP A | 312 | -4.599 | 34.993 | 8.053  | 1.00 | 0.78 | C |
| ATOM | 1369 | CZ2 TRP A | 312 | -5.776 | 32.792 | 9.277  | 1.00 | 0.78 | C |
| ATOM | 1370 | CZ3 TRP A | 312 | -3.836 | 34.155 | 8.856  | 1.00 | 0.78 | C |
| ATOM | 1371 | CH2 TRP A | 312 | -4.426 | 33.052 | 9.463  | 1.00 | 0.78 | C |
| ATOM | 1372 | N GLYA    | 313 | -6.740 | 37.508 | 9.373  | 1.00 | 0.86 | N |
| ATOM | 1373 | CA GLYA   | 313 | -5.982 | 37.513 | 10.640 | 1.00 | 0.86 | C |
| ATOM | 1374 | C GLYA    | 313 | -5.512 | 38.923 | 11.022 | 1.00 | 0.86 | C |
| ATOM | 1375 | O GLYA    | 313 | -6.155 | 39.927 | 10.721 | 1.00 | 0.86 | O |
| ATOM | 1376 | N GLU A   | 314 | -4.322 | 38.975 | 11.605 | 1.00 | 0.82 | N |
| ATOM | 1377 | CA GLU A  | 314 | -3.685 | 40.245 | 12.002 | 1.00 | 0.82 | C |
| ATOM | 1378 | C GLU A   | 314 | -2.848 | 40.819 | 10.851 | 1.00 | 0.82 | C |
| ATOM | 1379 | O GLU A   | 314 | -1.674 | 40.480 | 10.678 | 1.00 | 0.82 | O |
| ATOM | 1380 | CB GLU A  | 314 | -2.801 | 40.033 | 13.228 | 1.00 | 0.82 | C |
| ATOM | 1381 | CG GLU A  | 314 | -3.592 | 39.487 | 14.416 | 1.00 | 0.82 | C |
| ATOM | 1382 | CD GLU A  | 314 | -2.719 | 39.327 | 15.661 | 1.00 | 0.82 | C |
| ATOM | 1383 | OE1 GLU A | 314 | -1.496 | 39.096 | 15.524 | 1.00 | 0.82 | O |
| ATOM | 1384 | OE2 GLU A | 314 | -3.301 | 39.431 | 16.762 | 1.00 | 0.82 | O |
| ATOM | 1385 | N GLYA    | 315 | -3.556 | 41.549 | 9.980  | 1.00 | 0.83 | N |
| ATOM | 1386 | CA GLYA   | 315 | -2.959 | 42.165 | 8.775  | 1.00 | 0.83 | C |
| ATOM | 1387 | C GLYA    | 315 | -2.303 | 41.150 | 7.821  | 1.00 | 0.83 | C |
| ATOM | 1388 | O GLYA    | 315 | -1.314 | 41.464 | 7.161  | 1.00 | 0.83 | O |
| ATOM | 1389 | N GLYA    | 316 | -2.798 | 39.908 | 7.862  | 1.00 | 0.86 | N |
| ATOM | 1390 | CA GLYA   | 316 | -2.307 | 38.817 | 6.994  | 1.00 | 0.86 | C |
| ATOM | 1391 | C GLYA    | 316 | -1.555 | 37.720 | 7.761  | 1.00 | 0.86 | C |
| ATOM | 1392 | O GLYA    | 316 | -1.289 | 36.641 | 7.229  | 1.00 | 0.86 | O |
| ATOM | 1393 | N TYR A   | 317 | -1.204 | 38.031 | 9.005  | 1.00 | 0.84 | N |
| ATOM | 1394 | CA TYR A  | 317 | -0.427 | 37.136 | 9.875  | 1.00 | 0.84 | C |
| ATOM | 1395 | C TYR A   | 317 | -1.312 | 36.529 | 10.965 | 1.00 | 0.84 | C |
| ATOM | 1396 | O TYR A   | 317 | -2.422 | 36.981 | 11.243 | 1.00 | 0.84 | O |
| ATOM | 1397 | CB TYR A  | 317 | 0.721  | 37.902 | 10.541 | 1.00 | 0.84 | C |
| ATOM | 1398 | CG TYR A  | 317 | 1.691  | 38.491 | 9.518  | 1.00 | 0.84 | C |
| ATOM | 1399 | CD1 TYR A | 317 | 1.442  | 39.754 | 8.999  | 1.00 | 0.84 | C |
| ATOM | 1400 | CD2 TYR A | 317 | 2.822  | 37.788 | 9.130  | 1.00 | 0.84 | C |
| ATOM | 1401 | CE1 TYR A | 317 | 2.325  | 40.313 | 8.089  | 1.00 | 0.84 | C |
| ATOM | 1402 | CE2 TYR A | 317 | 3.709  | 38.346 | 8.220  | 1.00 | 0.84 | C |
| ATOM | 1403 | CZ TYR A  | 317 | 3.452  | 39.604 | 7.693  | 1.00 | 0.84 | C |
| ATOM | 1404 | OH TYR A  | 317 | 4.297  | 40.149 | 6.785  | 1.00 | 0.84 | O |
| ATOM | 1405 | N VALA    | 318 | -0.804 | 35.435 | 11.507 | 1.00 | 0.88 | N |

|      |      |     |      |     |        |        |        |        |      |      |   |
|------|------|-----|------|-----|--------|--------|--------|--------|------|------|---|
| ATOM | 1406 | CA  | VALA | 318 | -1.421 | 34.728 | 12.638 | 1.00   | 0.88 | C    |   |
| ATOM | 1407 | C   | VALA | 318 | -0.331 | 34.386 | 13.659 | 1.00   | 0.88 | C    |   |
| ATOM | 1408 | O   | VALA | 318 | 0.727  | 33.862 | 13.304 | 1.00   | 0.88 | O    |   |
| ATOM | 1409 | CB  | VALA | 318 | -2.185 | 33.484 | 12.132 | 1.00   | 0.88 | C    |   |
| ATOM | 1410 | CG1 | VALA | 318 | -1.298 | 32.451 | 11.426 | 1.00   | 0.88 | C    |   |
| ATOM | 1411 | CG2 | VALA | 318 | -2.971 | 32.799 | 13.252 | 1.00   | 0.88 | C    |   |
| ATOM | 1412 | N   | ARG  | A   | 319    | -0.650 | 34.648 | 14.915 | 1.00 | 0.87 | N |
| ATOM | 1413 | CA  | ARG  | A   | 319    | 0.220  | 34.233 | 16.025 | 1.00 | 0.87 | C |
| ATOM | 1414 | C   | ARG  | A   | 319    | -0.341 | 32.944 | 16.603 | 1.00 | 0.87 | C |
| ATOM | 1415 | O   | ARG  | A   | 319    | -1.488 | 32.894 | 17.040 | 1.00 | 0.87 | O |
| ATOM | 1416 | CB  | ARG  | A   | 319    | 0.294  | 35.290 | 17.121 | 1.00 | 0.87 | C |
| ATOM | 1417 | CG  | ARG  | A   | 319    | 1.100  | 36.501 | 16.652 | 1.00 | 0.87 | C |
| ATOM | 1418 | CD  | ARG  | A   | 319    | 1.187  | 37.559 | 17.750 | 1.00 | 0.87 | C |
| ATOM | 1419 | NE  | ARG  | A   | 319    | -0.147 | 38.120 | 18.031 | 1.00 | 0.87 | N |
| ATOM | 1420 | CZ  | ARG  | A   | 319    | -0.581 | 38.567 | 19.211 | 1.00 | 0.87 | C |
| ATOM | 1421 | NH1 | ARG  | A   | 319    | 0.191  | 38.537 | 20.289 | 1.00 | 0.87 | N |
| ATOM | 1422 | NH2 | ARG  | A   | 319    | -1.798 | 39.080 | 19.315 | 1.00 | 0.87 | N |
| ATOM | 1423 | N   | ILE  | A   | 320    | 0.422  | 31.886 | 16.425 | 1.00 | 0.85 | N |
| ATOM | 1424 | CA  | ILE  | A   | 320    | -0.017 | 30.554 | 16.864 | 1.00 | 0.85 | C |
| ATOM | 1425 | C   | ILE  | A   | 320    | 0.796  | 30.159 | 18.098 | 1.00 | 0.85 | C |
| ATOM | 1426 | O   | ILE  | A   | 320    | 2.007  | 30.374 | 18.149 | 1.00 | 0.85 | O |
| ATOM | 1427 | CB  | ILE  | A   | 320    | 0.169  | 29.552 | 15.722 | 1.00 | 0.85 | C |
| ATOM | 1428 | CG1 | ILE  | A   | 320    | 1.645  | 29.479 | 15.344 | 1.00 | 0.85 | C |
| ATOM | 1429 | CG2 | ILE  | A   | 320    | -0.708 | 29.925 | 14.510 | 1.00 | 0.85 | C |
| ATOM | 1430 | CD1 | ILE  | A   | 320    | 1.858  | 28.283 | 14.459 | 1.00 | 0.85 | C |
| ATOM | 1431 | N   | ARG  | A   | 321    | 0.120  | 29.561 | 19.064 | 1.00 | 0.80 | N |
| ATOM | 1432 | CA  | ARG  | A   | 321    | 0.785  | 29.102 | 20.296 | 1.00 | 0.80 | C |
| ATOM | 1433 | C   | ARG  | A   | 321    | 1.985  | 28.195 | 19.975 | 1.00 | 0.80 | C |
| ATOM | 1434 | O   | ARG  | A   | 321    | 1.935  | 27.323 | 19.104 | 1.00 | 0.80 | O |
| ATOM | 1435 | CB  | ARG  | A   | 321    | -0.221 | 28.391 | 21.203 | 1.00 | 0.80 | C |
| ATOM | 1436 | CG  | ARG  | A   | 321    | -0.830 | 27.151 | 20.545 | 1.00 | 0.80 | C |
| ATOM | 1437 | CD  | ARG  | A   | 321    | -1.742 | 26.456 | 21.540 | 1.00 | 0.80 | C |
| ATOM | 1438 | NE  | ARG  | A   | 321    | -2.281 | 25.214 | 20.961 | 1.00 | 0.80 | N |
| ATOM | 1439 | CZ  | ARG  | A   | 321    | -3.164 | 24.420 | 21.571 | 1.00 | 0.80 | C |
| ATOM | 1440 | NH1 | ARG  | A   | 321    | -3.665 | 24.747 | 22.760 | 1.00 | 0.80 | N |
| ATOM | 1441 | NH2 | ARG  | A   | 321    | -3.675 | 23.371 | 20.933 | 1.00 | 0.80 | N |
| ATOM | 1442 | N   | ARG  | A   | 322    | 3.076  | 28.483 | 20.659 | 1.00 | 0.79 | N |
| ATOM | 1443 | CA  | ARG  | A   | 322    | 4.354  | 27.782 | 20.463 | 1.00 | 0.79 | C |
| ATOM | 1444 | C   | ARG  | A   | 322    | 4.661  | 26.920 | 21.691 | 1.00 | 0.79 | C |
| ATOM | 1445 | O   | ARG  | A   | 322    | 4.165  | 27.208 | 22.776 | 1.00 | 0.79 | O |
| ATOM | 1446 | CB  | ARG  | A   | 322    | 5.426  | 28.843 | 20.216 | 1.00 | 0.79 | C |
| ATOM | 1447 | CG  | ARG  | A   | 322    | 6.843  | 28.279 | 20.094 | 1.00 | 0.79 | C |

|      |      |     |      |     |        |        |        |        |      |      |   |
|------|------|-----|------|-----|--------|--------|--------|--------|------|------|---|
| ATOM | 1448 | CD  | ARG  | A   | 322    | 7.824  | 29.345 | 19.608 | 1.00 | 0.79 | C |
| ATOM | 1449 | NE  | ARG  | A   | 322    | 7.917  | 30.468 | 20.550 | 1.00 | 0.79 | N |
| ATOM | 1450 | CZ  | ARG  | A   | 322    | 8.621  | 30.473 | 21.681 | 1.00 | 0.79 | C |
| ATOM | 1451 | NH1 | ARG  | A   | 322    | 9.315  | 29.409 | 22.071 | 1.00 | 0.79 | N |
| ATOM | 1452 | NH2 | ARG  | A   | 322    | 8.677  | 31.575 | 22.412 | 1.00 | 0.79 | N |
| ATOM | 1453 | N   | GLYA | 323 | 5.360  | 25.807 | 21.410 | 1.00   | 0.80 | N    |   |
| ATOM | 1454 | CA  | GLYA | 323 | 5.779  | 24.774 | 22.386 | 1.00   | 0.80 | C    |   |
| ATOM | 1455 | C   | GLYA | 323 | 4.604  | 24.177 | 23.171 | 1.00   | 0.80 | C    |   |
| ATOM | 1456 | O   | GLYA | 323 | 4.614  | 23.950 | 24.372 | 1.00   | 0.80 | O    |   |
| ATOM | 1457 | N   | VALA | 324 | 3.667  | 23.693 | 22.393 | 1.00   | 0.75 | N    |   |
| ATOM | 1458 | CA  | VALA | 324 | 2.491  | 23.038 | 22.978 | 1.00   | 0.75 | C    |   |
| ATOM | 1459 | C   | VALA | 324 | 2.589  | 21.514 | 22.846 | 1.00   | 0.75 | C    |   |
| ATOM | 1460 | O   | VALA | 324 | 2.460  | 20.770 | 23.813 | 1.00   | 0.75 | O    |   |
| ATOM | 1461 | CB  | VALA | 324 | 1.202  | 23.657 | 22.406 | 1.00   | 0.75 | C    |   |
| ATOM | 1462 | CG1 | VALA | 324 | 1.072  | 23.545 | 20.880 | 1.00   | 0.75 | C    |   |
| ATOM | 1463 | CG2 | VALA | 324 | -0.025 | 23.090 | 23.124 | 1.00   | 0.75 | C    |   |
| ATOM | 1464 | N   | ARG  | A   | 325    | 2.761  | 21.081 | 21.607 | 1.00 | 0.68 | N |
| ATOM | 1465 | CA  | ARG  | A   | 325    | 2.767  | 19.653 | 21.276 | 1.00 | 0.68 | C |
| ATOM | 1466 | C   | ARG  | A   | 325    | 3.966  | 19.293 | 20.403 | 1.00 | 0.68 | C |
| ATOM | 1467 | O   | ARG  | A   | 325    | 4.493  | 20.134 | 19.676 | 1.00 | 0.68 | O |
| ATOM | 1468 | CB  | ARG  | A   | 325    | 1.435  | 19.240 | 20.637 | 1.00 | 0.68 | C |
| ATOM | 1469 | CG  | ARG  | A   | 325    | 1.124  | 20.034 | 19.373 | 1.00 | 0.68 | C |
| ATOM | 1470 | CD  | ARG  | A   | 325    | -0.138 | 19.564 | 18.674 | 1.00 | 0.68 | C |
| ATOM | 1471 | NE  | ARG  | A   | 325    | -1.281 | 19.921 | 19.520 | 1.00 | 0.68 | N |
| ATOM | 1472 | CZ  | ARG  | A   | 325    | -2.536 | 19.561 | 19.284 | 1.00 | 0.68 | C |
| ATOM | 1473 | NH1 | ARG  | A   | 325    | -2.848 | 18.830 | 18.220 | 1.00 | 0.68 | N |
| ATOM | 1474 | NH2 | ARG  | A   | 325    | -3.489 | 19.921 | 20.129 | 1.00 | 0.68 | N |
| ATOM | 1475 | N   | GLYA | 326 | 4.289  | 17.999 | 20.453 | 1.00   | 0.75 | N    |   |
| ATOM | 1476 | CA  | GLYA | 326 | 5.398  | 17.406 | 19.677 | 1.00   | 0.75 | C    |   |
| ATOM | 1477 | C   | GLYA | 326 | 5.276  | 17.679 | 18.171 | 1.00   | 0.75 | C    |   |
| ATOM | 1478 | O   | GLYA | 326 | 6.210  | 18.173 | 17.553 | 1.00   | 0.75 | O    |   |
| ATOM | 1479 | N   | GLU  | A   | 327    | 4.070  | 17.500 | 17.638 | 1.00 | 0.72 | N |
| ATOM | 1480 | CA  | GLU  | A   | 327    | 3.749  | 17.854 | 16.236 | 1.00 | 0.72 | C |
| ATOM | 1481 | C   | GLU  | A   | 327    | 3.628  | 19.373 | 16.031 | 1.00 | 0.72 | C |
| ATOM | 1482 | O   | GLU  | A   | 327    | 3.736  | 19.883 | 14.916 | 1.00 | 0.72 | O |
| ATOM | 1483 | CB  | GLU  | A   | 327    | 2.461  | 17.181 | 15.739 | 1.00 | 0.72 | C |
| ATOM | 1484 | CG  | GLU  | A   | 327    | 2.537  | 15.648 | 15.751 | 1.00 | 0.72 | C |
| ATOM | 1485 | CD  | GLU  | A   | 327    | 2.260  | 14.998 | 17.113 | 1.00 | 0.72 | C |
| ATOM | 1486 | OE1 | GLU  | A   | 327    | 2.069  | 15.736 | 18.112 | 1.00 | 0.72 | O |
| ATOM | 1487 | OE2 | GLU  | A   | 327    | 2.171  | 13.756 | 17.124 | 1.00 | 0.72 | O |
| ATOM | 1488 | N   | GLYA | 328 | 3.397  | 20.088 | 17.136 | 1.00   | 0.83 | N    |   |
| ATOM | 1489 | CA  | GLYA | 328 | 3.170  | 21.547 | 17.112 | 1.00   | 0.83 | C    |   |

|      |      |     |      |     |        |        |        |        |      |      |   |
|------|------|-----|------|-----|--------|--------|--------|--------|------|------|---|
| ATOM | 1490 | C   | GLYA | 328 | 1.711  | 21.824 | 16.730 | 1.00   | 0.83 | C    |   |
| ATOM | 1491 | O   | GLYA | 328 | 1.006  | 20.961 | 16.204 | 1.00   | 0.83 | O    |   |
| ATOM | 1492 | N   | VALA | 329 | 1.250  | 23.018 | 17.077 | 1.00   | 0.86 | N    |   |
| ATOM | 1493 | CA  | VALA | 329 | -0.124 | 23.463 | 16.762 | 1.00   | 0.86 | C    |   |
| ATOM | 1494 | C   | VALA | 329 | -0.394 | 23.348 | 15.252 | 1.00   | 0.86 | C    |   |
| ATOM | 1495 | O   | VALA | 329 | 0.412  | 23.789 | 14.431 | 1.00   | 0.86 | O    |   |
| ATOM | 1496 | CB  | VALA | 329 | -0.352 | 24.900 | 17.265 | 1.00   | 0.86 | C    |   |
| ATOM | 1497 | CG1 | VALA | 329 | 0.586  | 25.914 | 16.609 | 1.00   | 0.86 | C    |   |
| ATOM | 1498 | CG2 | VALA | 329 | -1.813 | 25.332 | 17.100 | 1.00   | 0.86 | C    |   |
| ATOM | 1499 | N   | CYSA | 330 | -1.476 | 22.650 | 14.931 | 1.00   | 0.91 | N    |   |
| ATOM | 1500 | CA  | CYSA | 330 | -1.893 | 22.395 | 13.533 | 1.00   | 0.91 | C    |   |
| ATOM | 1501 | C   | CYSA | 330 | -0.800 | 21.643 | 12.747 | 1.00   | 0.91 | C    |   |
| ATOM | 1502 | O   | CYSA | 330 | -0.760 | 21.670 | 11.517 | 1.00   | 0.91 | O    |   |
| ATOM | 1503 | CB  | CYSA | 330 | -2.267 | 23.717 | 12.833 | 1.00   | 0.91 | C    |   |
| ATOM | 1504 | SG  | CYSA | 330 | -3.323 | 24.840 | 13.823 | 1.00   | 0.91 | S    |   |
| ATOM | 1505 | N   | GLYA | 331 | 0.066  | 20.956 | 13.508 | 1.00   | 0.97 | N    |   |
| ATOM | 1506 | CA  | GLYA | 331 | 1.201  | 20.181 | 12.977 | 1.00   | 0.97 | C    |   |
| ATOM | 1507 | C   | GLYA | 331 | 2.273  | 21.054 | 12.313 | 1.00   | 0.97 | C    |   |
| ATOM | 1508 | O   | GLYA | 331 | 3.023  | 20.568 | 11.470 | 1.00   | 0.97 | O    |   |
| ATOM | 1509 | N   | LEUA | 332 | 2.455  | 22.268 | 12.835 | 1.00   | 0.87 | N    |   |
| ATOM | 1510 | CA  | LEUA | 332 | 3.449  | 23.212 | 12.293 | 1.00   | 0.87 | C    |   |
| ATOM | 1511 | C   | LEUA | 332 | 4.897  | 22.675 | 12.320 | 1.00   | 0.87 | C    |   |
| ATOM | 1512 | O   | LEUA | 332 | 5.734  | 23.075 | 11.510 | 1.00   | 0.87 | O    |   |
| ATOM | 1513 | CB  | LEUA | 332 | 3.313  | 24.566 | 13.002 | 1.00   | 0.87 | C    |   |
| ATOM | 1514 | CG  | LEUA | 332 | 4.324  | 25.545 | 12.403 | 1.00   | 0.87 | C    |   |
| ATOM | 1515 | CD1 | LEUA | 332 | 3.894  | 26.968 | 12.505 | 1.00   | 0.87 | C    |   |
| ATOM | 1516 | CD2 | LEUA | 332 | 5.566  | 25.599 | 13.260 | 1.00   | 0.87 | C    |   |
| ATOM | 1517 | N   | ALA  | A   | 333    | 5.191  | 21.811 | 13.286 | 1.00 | 0.83 | N |
| ATOM | 1518 | CA  | ALA  | A   | 333    | 6.548  | 21.254 | 13.454 | 1.00 | 0.83 | C |
| ATOM | 1519 | C   | ALA  | A   | 333    | 6.815  | 19.976 | 12.637 | 1.00 | 0.83 | C |
| ATOM | 1520 | O   | ALA  | A   | 333    | 7.924  | 19.443 | 12.670 | 1.00 | 0.83 | O |
| ATOM | 1521 | CB  | ALA  | A   | 333    | 6.800  | 21.004 | 14.942 | 1.00 | 0.83 | C |
| ATOM | 1522 | N   | LYS  | A   | 334    | 5.799  | 19.497 | 11.919 | 1.00 | 0.76 | N |
| ATOM | 1523 | CA  | LYS  | A   | 334    | 5.883  | 18.251 | 11.135 | 1.00 | 0.76 | C |
| ATOM | 1524 | C   | LYS  | A   | 334    | 6.776  | 18.346 | 9.881  | 1.00 | 0.76 | C |
| ATOM | 1525 | O   | LYS  | A   | 334    | 7.732  | 17.597 | 9.734  | 1.00 | 0.76 | O |
| ATOM | 1526 | CB  | LYS  | A   | 334    | 4.474  | 17.804 | 10.735 | 1.00 | 0.76 | C |
| ATOM | 1527 | CG  | LYS  | A   | 334    | 3.590  | 17.352 | 11.902 | 1.00 | 0.76 | C |
| ATOM | 1528 | CD  | LYS  | A   | 334    | 4.062  | 16.066 | 12.578 | 1.00 | 0.76 | C |
| ATOM | 1529 | CE  | LYS  | A   | 334    | 4.138  | 14.789 | 11.746 | 1.00 | 0.76 | C |
| ATOM | 1530 | NZ  | LYS  | A   | 334    | 4.785  | 13.688 | 12.479 | 1.00 | 0.76 | N |
| ATOM | 1531 | N   | LEUA | 335 | 6.569  | 19.384 | 9.074  | 1.00   | 0.82 | N    |   |

|      |      |     |      |     |        |        |        |       |      |      |   |
|------|------|-----|------|-----|--------|--------|--------|-------|------|------|---|
| ATOM | 1532 | CA  | LEUA | 335 | 7.336  | 19.519 | 7.815  | 1.00  | 0.82 | C    |   |
| ATOM | 1533 | C   | LEUA | 335 | 7.898  | 20.949 | 7.632  | 1.00  | 0.82 | C    |   |
| ATOM | 1534 | O   | LEUA | 335 | 7.373  | 21.744 | 6.854  | 1.00  | 0.82 | O    |   |
| ATOM | 1535 | CB  | LEUA | 335 | 6.450  | 19.025 | 6.660  | 1.00  | 0.82 | C    |   |
| ATOM | 1536 | CG  | LEUA | 335 | 7.154  | 18.871 | 5.301  | 1.00  | 0.82 | C    |   |
| ATOM | 1537 | CD1 | LEUA | 335 | 6.379  | 17.852 | 4.476  | 1.00  | 0.82 | C    |   |
| ATOM | 1538 | CD2 | LEUA | 335 | 7.153  | 20.152 | 4.462  | 1.00  | 0.82 | C    |   |
| ATOM | 1539 | N   | PROA | 336 | 8.846  | 21.347 | 8.483  | 1.00  | 0.87 | N    |   |
| ATOM | 1540 | CA  | PROA | 336 | 9.509  | 22.647 | 8.320  | 1.00  | 0.87 | C    |   |
| ATOM | 1541 | C   | PROA | 336 | 10.826 | 22.475 | 7.561  | 1.00  | 0.87 | C    |   |
| ATOM | 1542 | O   | PROA | 336 | 11.562 | 21.513 | 7.754  | 1.00  | 0.87 | O    |   |
| ATOM | 1543 | CB  | PROA | 336 | 9.718  | 23.122 | 9.753  | 1.00  | 0.87 | C    |   |
| ATOM | 1544 | CG  | PROA | 336 | 9.955  | 21.835 | 10.541 | 1.00  | 0.87 | C    |   |
| ATOM | 1545 | CD  | PROA | 336 | 9.084  | 20.807 | 9.838  | 1.00  | 0.87 | C    |   |
| ATOM | 1546 | N   | SERA | 337 | 11.156 | 23.463 | 6.750  | 1.00  | 0.85 | N    |   |
| ATOM | 1547 | CA  | SERA | 337 | 12.389 | 23.458 | 5.940  | 1.00  | 0.85 | C    |   |
| ATOM | 1548 | C   | SERA | 337 | 12.735 | 24.881 | 5.512  | 1.00  | 0.85 | C    |   |
| ATOM | 1549 | O   | SERA | 337 | 11.893 | 25.780 | 5.532  | 1.00  | 0.85 | O    |   |
| ATOM | 1550 | CB  | SERA | 337 | 12.235 | 22.576 | 4.697  | 1.00  | 0.85 | C    |   |
| ATOM | 1551 | OG  | SERA | 337 | 11.191 | 23.067 | 3.851  | 1.00  | 0.85 | O    |   |
| ATOM | 1552 | N   | TYR  | A   | 338    | 14.011 | 25.067 | 5.213 | 1.00 | 0.79 | N |
| ATOM | 1553 | CA  | TYR  | A   | 338    | 14.555 | 26.392 | 4.884 | 1.00 | 0.79 | C |
| ATOM | 1554 | C   | TYR  | A   | 338    | 15.670 | 26.315 | 3.827 | 1.00 | 0.79 | C |
| ATOM | 1555 | O   | TYR  | A   | 338    | 16.324 | 25.271 | 3.707 | 1.00 | 0.79 | O |
| ATOM | 1556 | CB  | TYR  | A   | 338    | 15.057 | 27.074 | 6.167 | 1.00 | 0.79 | C |
| ATOM | 1557 | CG  | TYR  | A   | 338    | 16.081 | 26.205 | 6.891 | 1.00 | 0.79 | C |
| ATOM | 1558 | CD1 | TYR  | A   | 338    | 17.420 | 26.255 | 6.528 | 1.00 | 0.79 | C |
| ATOM | 1559 | CD2 | TYR  | A   | 338    | 15.638 | 25.299 | 7.842 | 1.00 | 0.79 | C |
| ATOM | 1560 | CE1 | TYR  | A   | 338    | 18.325 | 25.392 | 7.126 | 1.00 | 0.79 | C |
| ATOM | 1561 | CE2 | TYR  | A   | 338    | 16.541 | 24.437 | 8.443 | 1.00 | 0.79 | C |
| ATOM | 1562 | CZ  | TYR  | A   | 338    | 17.882 | 24.485 | 8.080 | 1.00 | 0.79 | C |
| ATOM | 1563 | OH  | TYR  | A   | 338    | 18.763 | 23.620 | 8.642 | 1.00 | 0.79 | O |
| ATOM | 1564 | N   | PROA | 339 | 15.823 | 27.397 | 3.050  | 1.00  | 0.78 | N    |   |
| ATOM | 1565 | CA  | PROA | 339 | 16.882 | 27.532 | 2.041  | 1.00  | 0.78 | C    |   |
| ATOM | 1566 | C   | PROA | 339 | 18.226 | 27.809 | 2.713  | 1.00  | 0.78 | C    |   |
| ATOM | 1567 | O   | PROA | 339 | 18.318 | 28.268 | 3.848  | 1.00  | 0.78 | O    |   |
| ATOM | 1568 | CB  | PROA | 339 | 16.439 | 28.722 | 1.187  | 1.00  | 0.78 | C    |   |
| ATOM | 1569 | CG  | PROA | 339 | 15.733 | 29.627 | 2.194  | 1.00  | 0.78 | C    |   |
| ATOM | 1570 | CD  | PROA | 339 | 14.999 | 28.625 | 3.081  | 1.00  | 0.78 | C    |   |
| ATOM | 1571 | N   | VALA | 340 | 19.263 | 27.458 | 1.981  | 1.00  | 0.66 | N    |   |
| ATOM | 1572 | CA  | VALA | 340 | 20.643 | 27.704 | 2.418  | 1.00  | 0.66 | C    |   |
| ATOM | 1573 | C   | VALA | 340 | 21.285 | 28.738 | 1.460  | 1.00  | 0.66 | C    |   |



|      |      |     |      |     |        |        |       |      |      |   |
|------|------|-----|------|-----|--------|--------|-------|------|------|---|
| ATOM | 1574 | O   | VALA | 340 | 21.072 | 28.541 | 0.232 | 1.00 | 0.66 | O |
| ATOM | 1575 | CB  | VALA | 340 | 21.394 | 26.361 | 2.579 | 1.00 | 0.66 | C |
| ATOM | 1576 | CG1 | VALA | 340 | 20.800 | 25.435 | 3.638 | 1.00 | 0.66 | C |
| ATOM | 1577 | CG2 | VALA | 340 | 21.404 | 25.497 | 1.341 | 1.00 | 0.66 | C |
| ATOM | 1578 | OXT | VALA | 340 | 21.586 | 29.837 | 1.931 | 1.00 | 0.66 | O |
| TER  | 1579 |     | VALA | 340 |        |        |       |      |      |   |
| END  |      |     |      |     |        |        |       |      |      |   |

## 2. The Structure of R'-7-Amido-4-methylcoumarin (R'-AMC) and R''-R-AMC

**Figure S1.** (a) the structure of R'-7-Amido-4-methylcoumarin (R'-AMC); (b) the structure of R''-R-AMC. (R', R'' refers to G, A, V, L, I, F, W, M, Y, S, T, N, Q, D, E, K, R, and H residues).

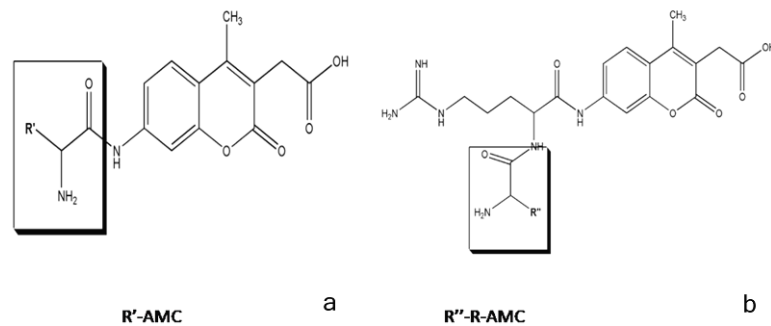

© 2014 by the authors; licensee MDPI, Basel, Switzerland. This article is an open access article distributed under the terms and conditions of the Creative Commons Attribution license (<http://creativecommons.org/licenses/by/3.0/>).
